# Supplementary material for: Histone Deacetylase Inhibitory Activity and Antiproliferative Potential of New [6]-Shogaol Derivatives
Source: Molecules. 2022 May 22;27(10):3332. doi: 10.3390/molecules27103332 (PMC9144829; doi:10.3390/molecules27103332)
Supplement: Supplementary file 1 [file molecules-27-03332-s001.zip › molecules-1719646-supplementary.pdf]

# **Histone Deacetylase Inhibitory Activity and Antiproliferative Potential of New [6]-Shogaol Derivatives**

Chanokbhorn Phaosiri <sup>1</sup>, Chavi Yenjai <sup>1</sup>, Thanaset Senawong <sup>2</sup>, Gulsiri Senawong <sup>2</sup>, Somprasong Saenglee <sup>3</sup>, La-or Somsakeesit <sup>4</sup>, Pakit Kumboonma <sup>5\*</sup>

<sup>1</sup> Natural Products Research Unit, Center of Excellence for Innovation in Chemistry, Ministry of Higher Education, Science, Research and Innovation (Implementation Unit-IU, Khon Kaen University), Department of Chemistry, Faculty of Science, Khon Kaen University, Khon Kaen, 40002 Thailand

<sup>2</sup> Natural Products Research Unit, Department of Biochemistry, Faculty of Science, Khon Kaen University, Khon Kaen, 40002 Thailand

<sup>3</sup> Ban Dong Subdistrict Administration Organization, Ubolratana District, Khon Kaen, 40250 Thailand

<sup>4</sup> Department of Chemistry, Faculty of Engineering, Rajamangala University of Technology Isan, Khon Kaen, 40000 Thailand

<sup>5</sup> Department of Applied Chemistry, Faculty of Science and Liberal Arts, Rajamangala University of Technology Isan, Nakhon Ratchasima, 30000 Thailand

\* To whom correspondence should be addressed. e-mail: pakit.ku@rmuti.ac.th

## **Supporting Information**

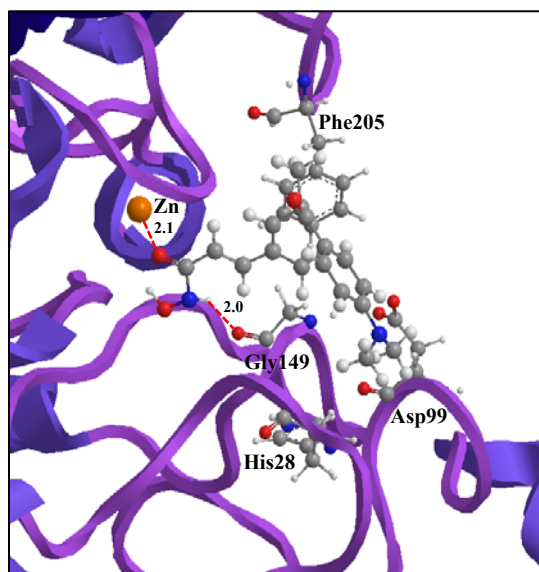

**Figure S1.** The interaction mode of TSA in the active site of HDAC1.

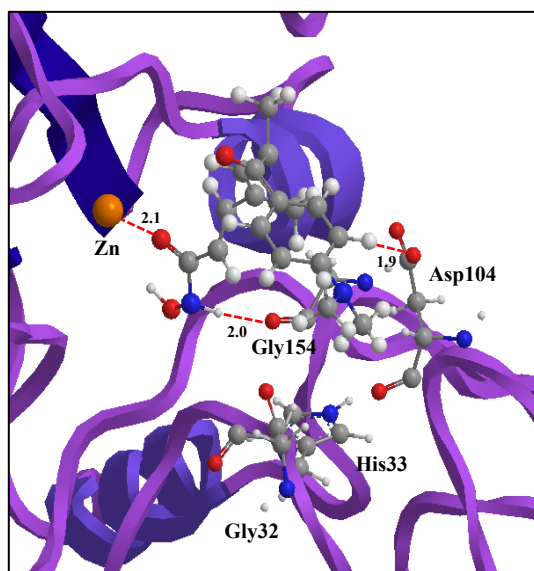

**Figure S2.** The interaction mode of TSA in the active site of HDAC2.

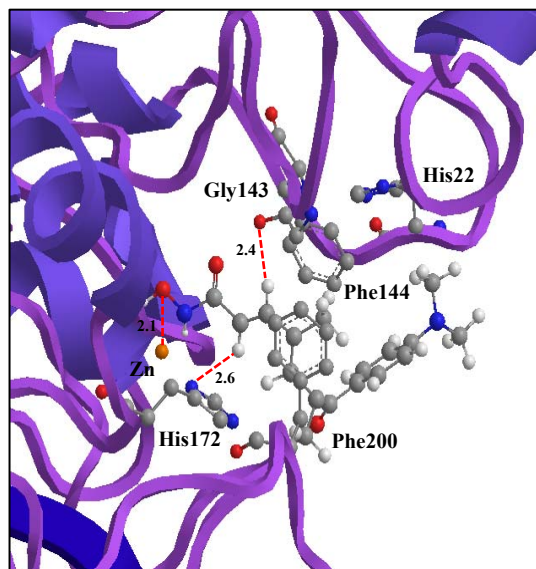

**Figure S3.** The interaction mode of TSA in the active site of HDAC3.

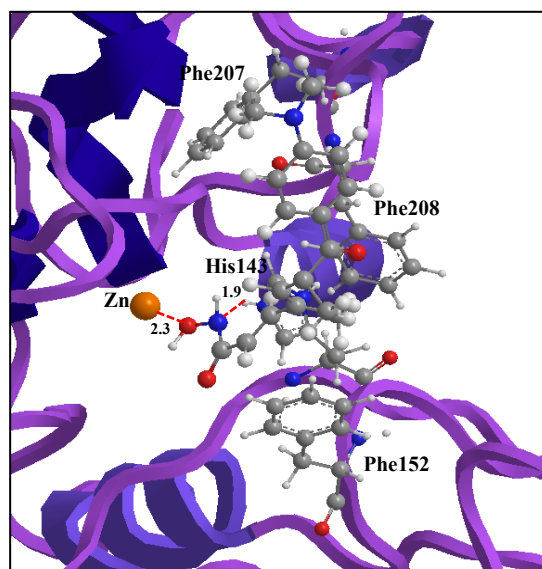

**Figure S4.** The interaction mode of TSA in the active site of HDAC8.

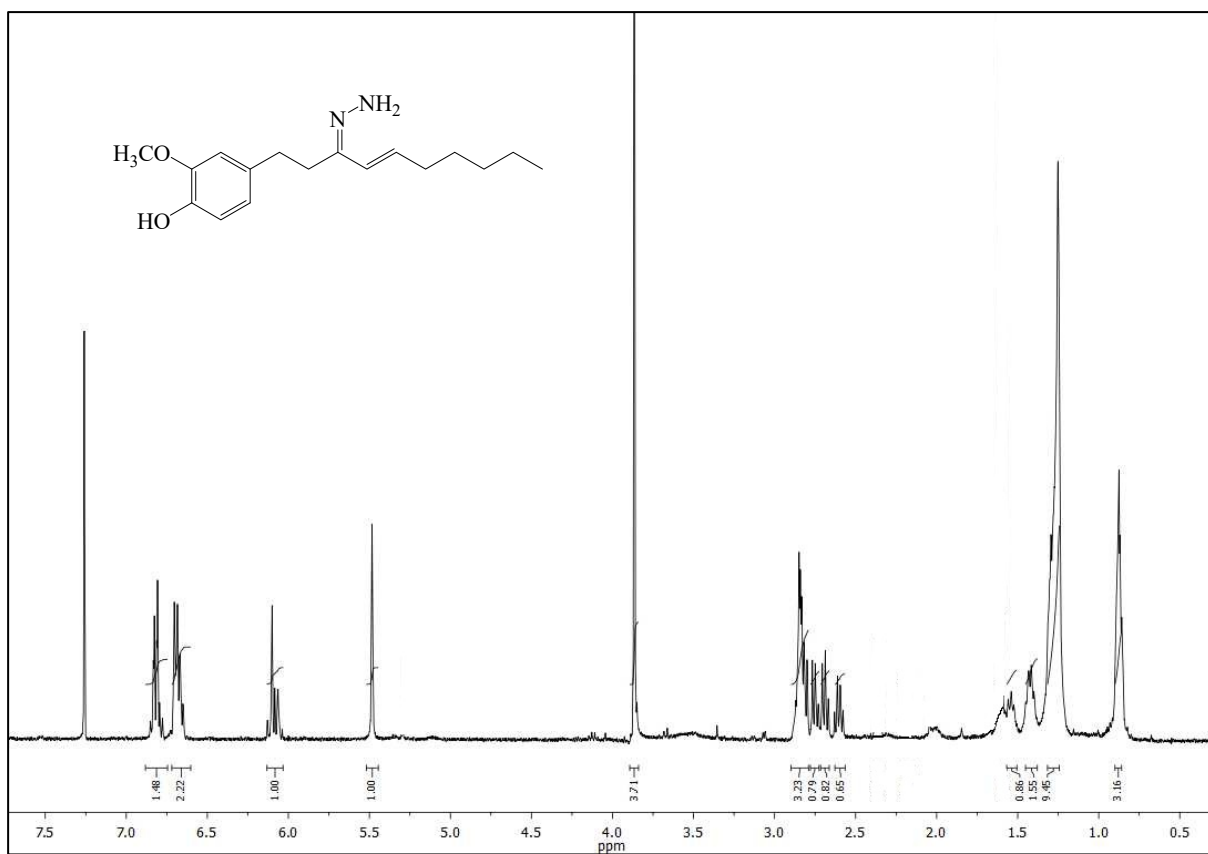

Figure S5. <sup>1</sup>H NMR spectrum of 4a.

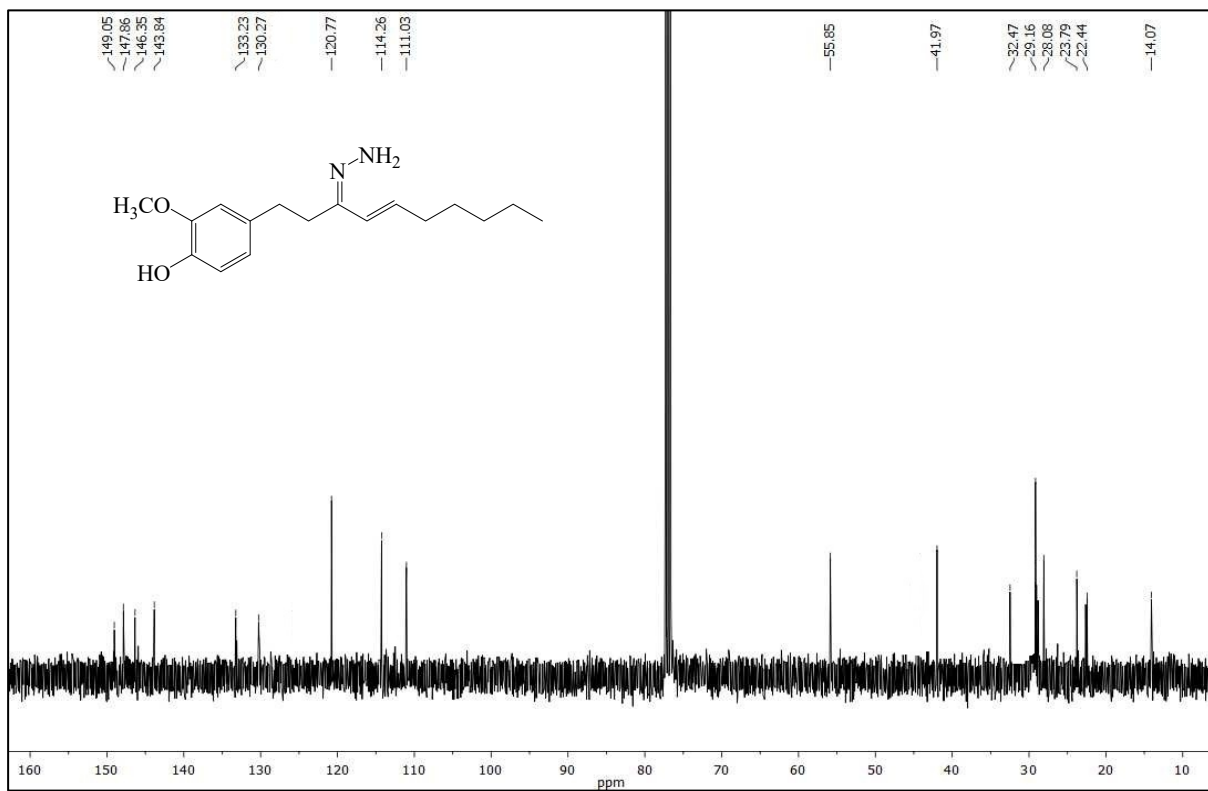

Figure S6. <sup>13</sup>C NMR spectrum of 4a.

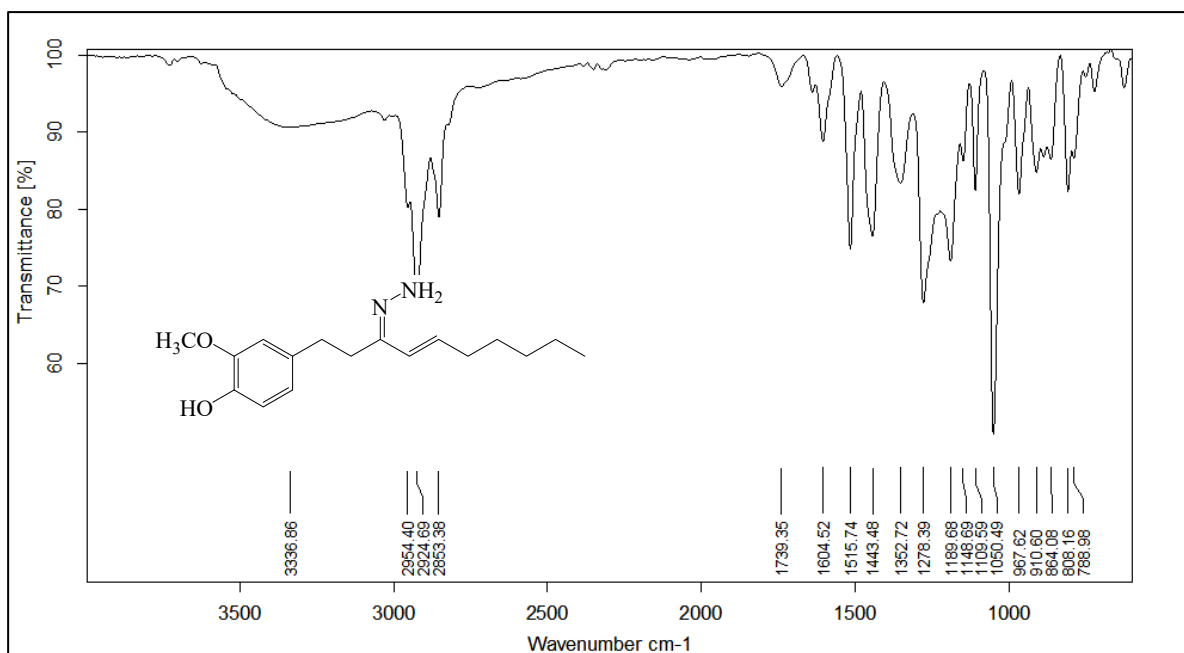

**Figure S7.** IR spectrum of **4a**.

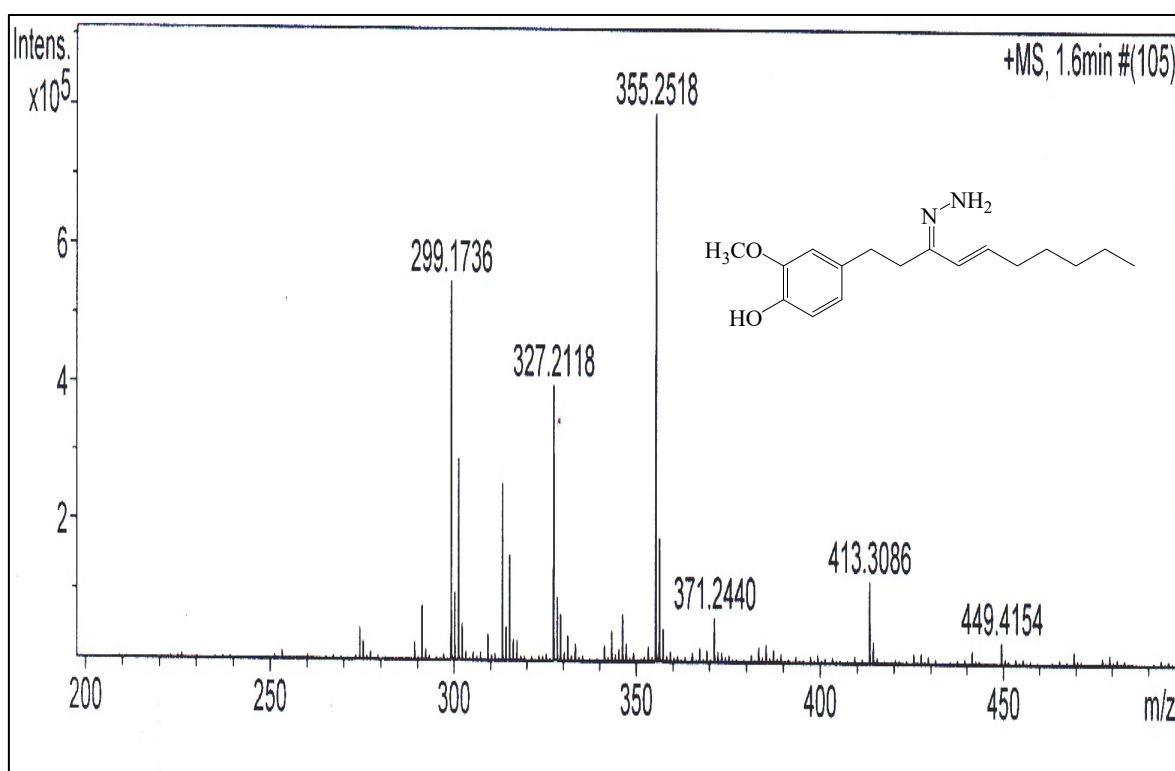

**Figure S8.** Mass spectrum of **4a**.

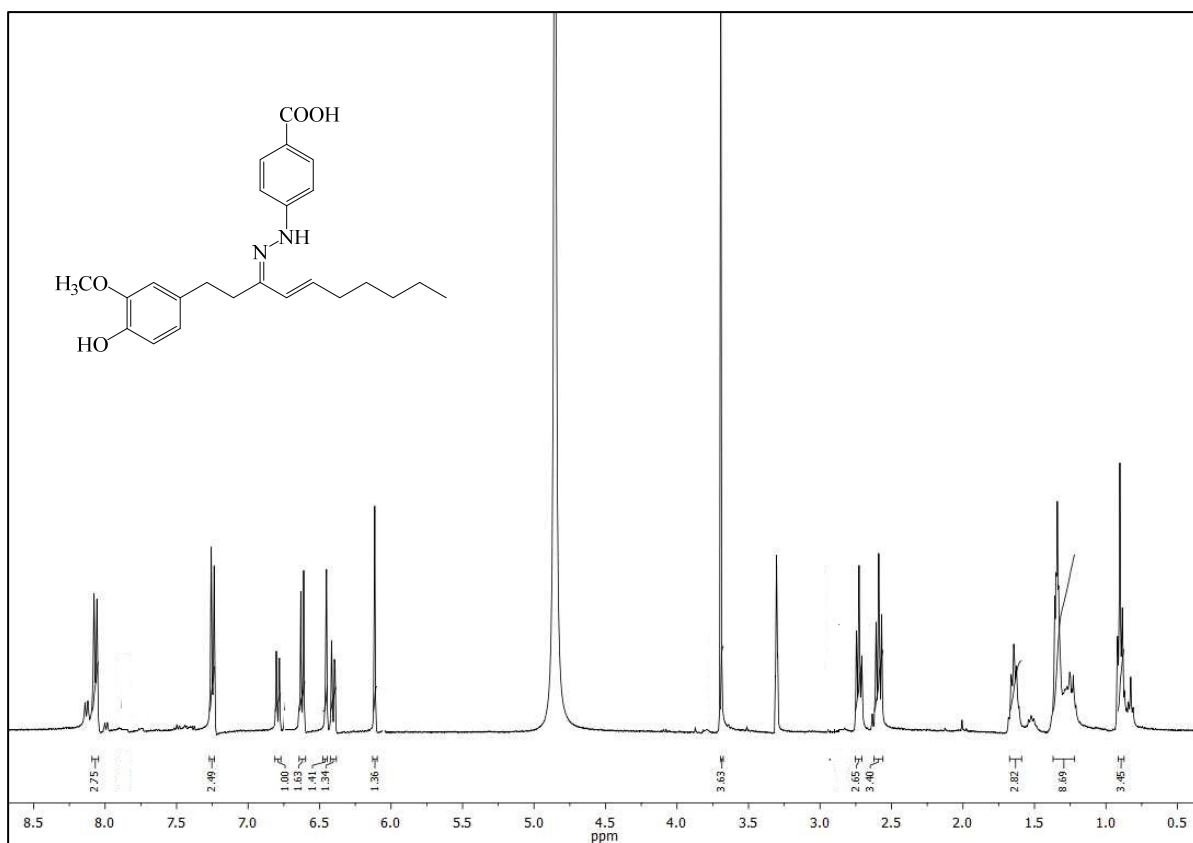

**Figure S9.** <sup>1</sup>H NMR spectrum of **4b**.

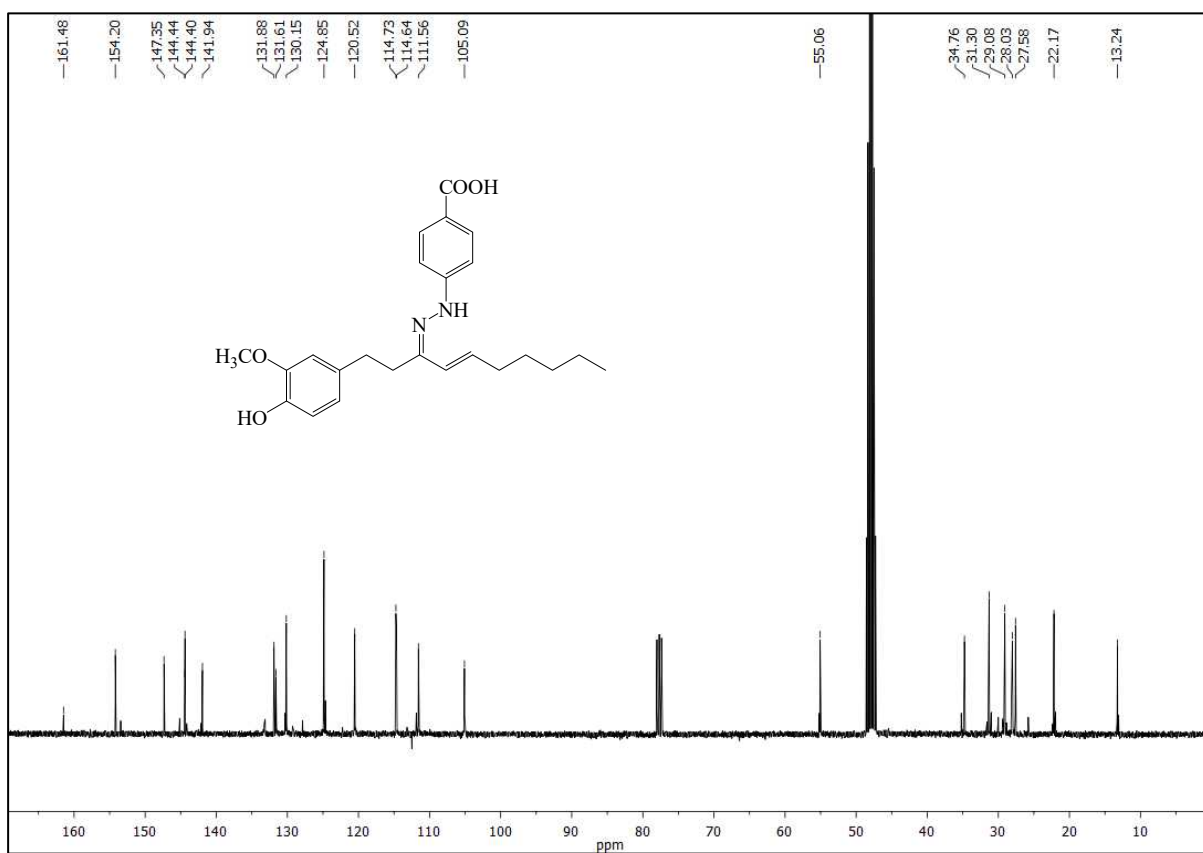

**Figure S10.** <sup>13</sup>C NMR spectrum of **4b**.

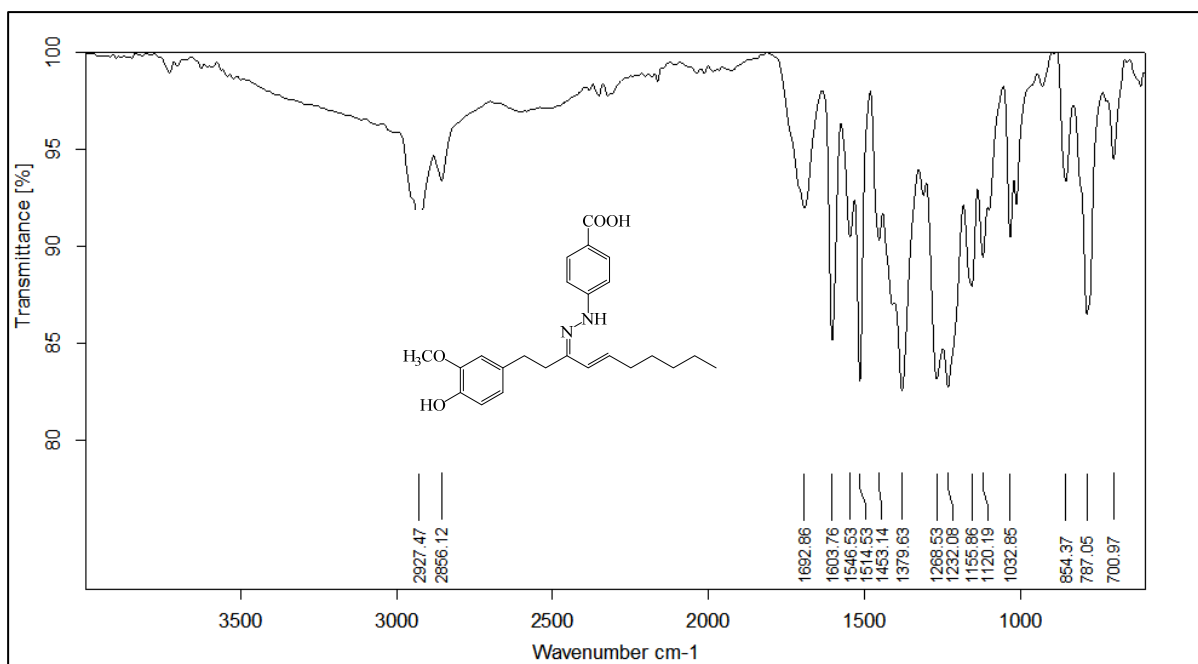

**Figure S11.** IR spectrum of **4b**.

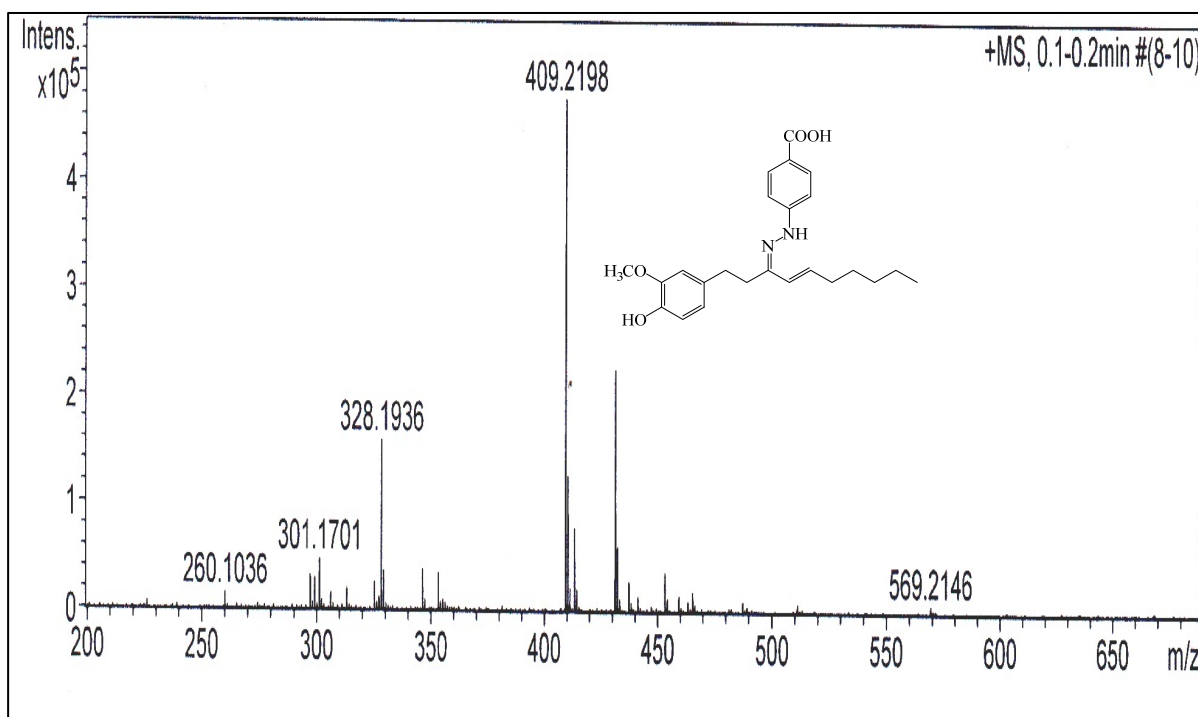

**Figure S12.** Mass spectrum of **4b**.

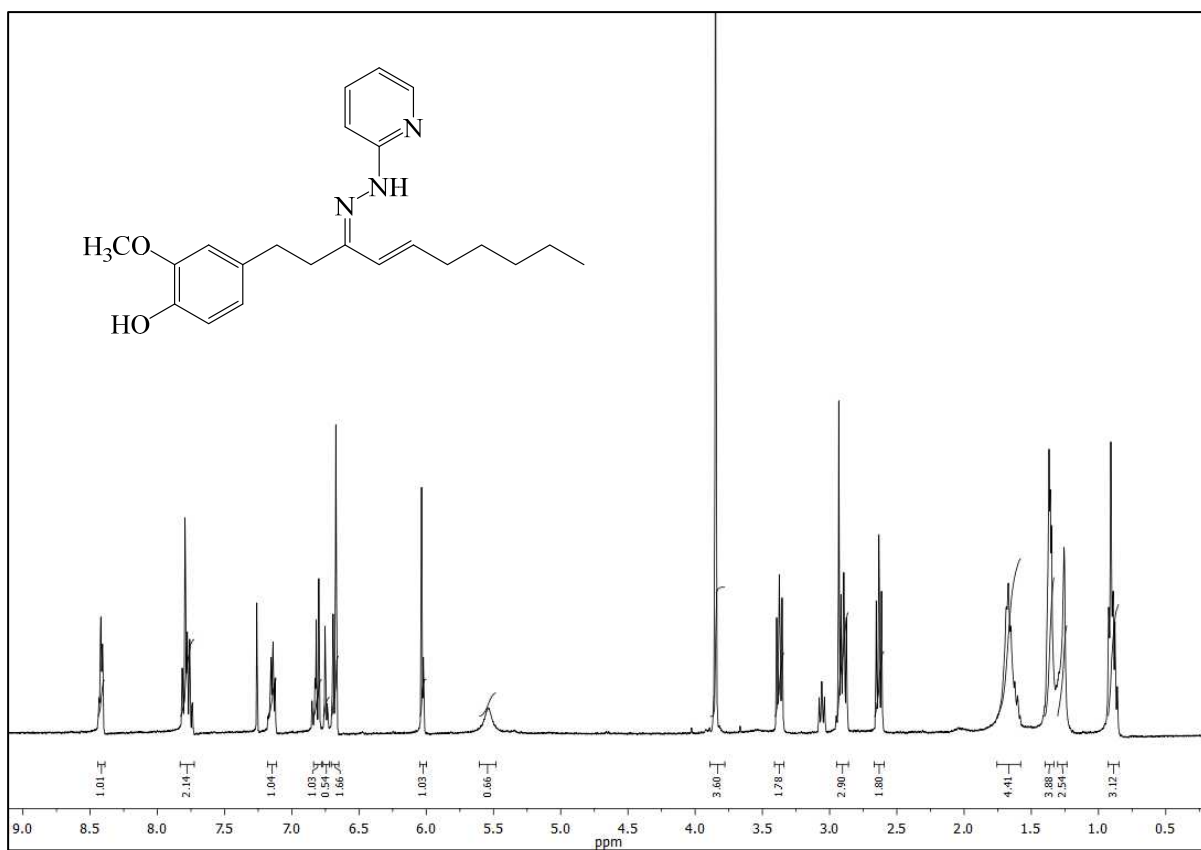

Figure S13. <sup>1</sup>H NMR spectrum of 4c.

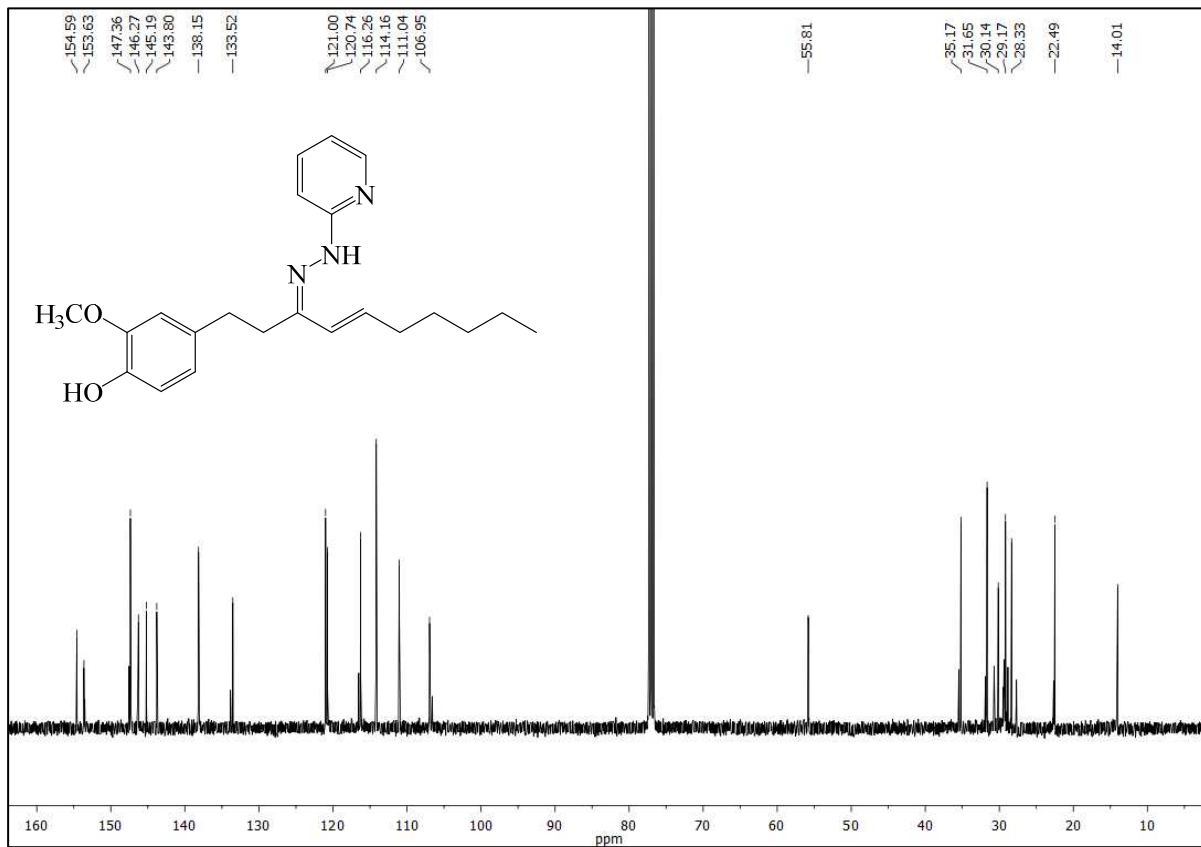

Figure S14. <sup>13</sup>C NMR spectrum of 4c.

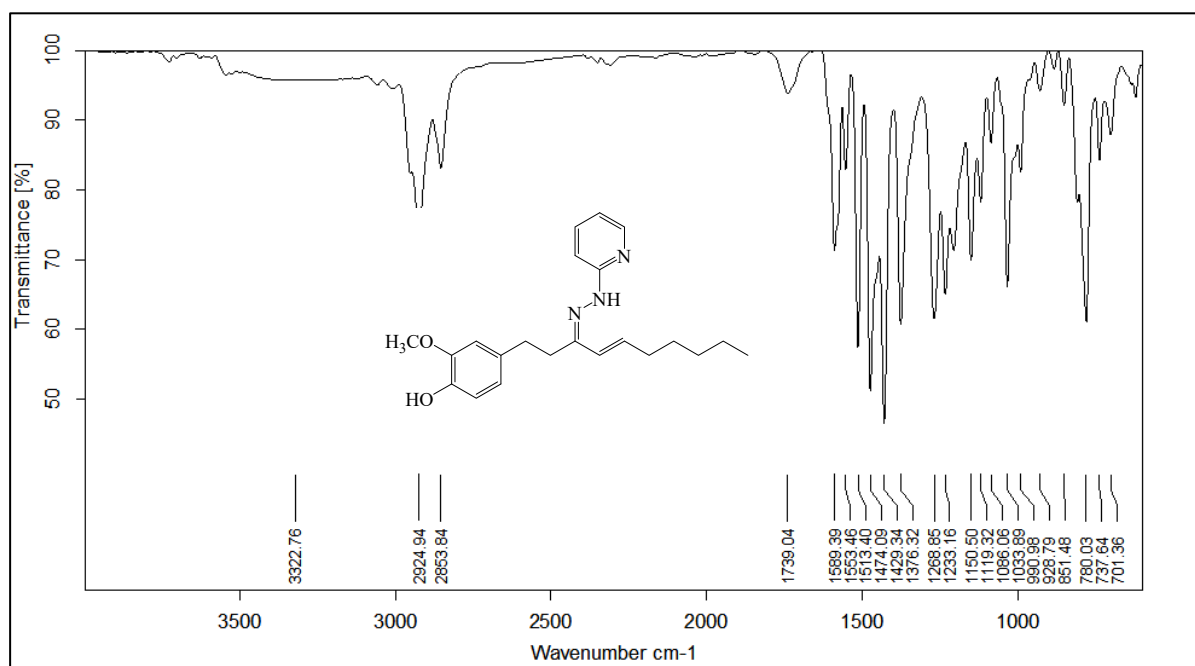

**Figure S15.** IR spectrum of **4c**.

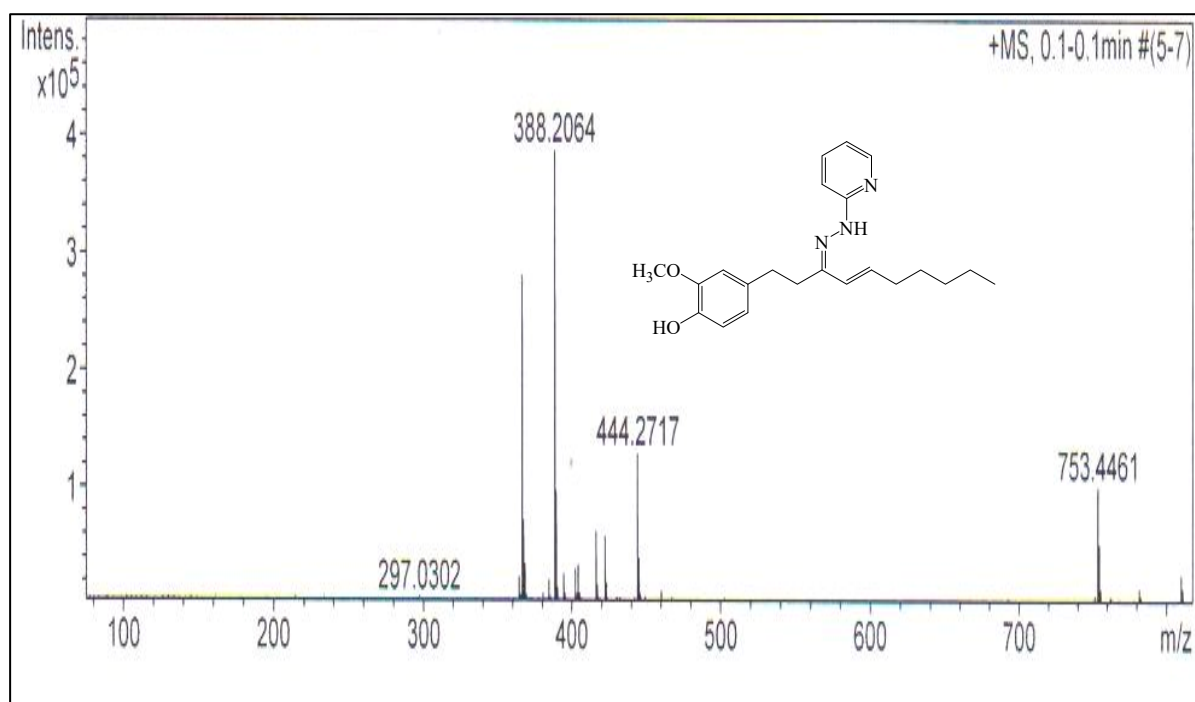

**Figure S16.** Mass spectrum of **4c**.

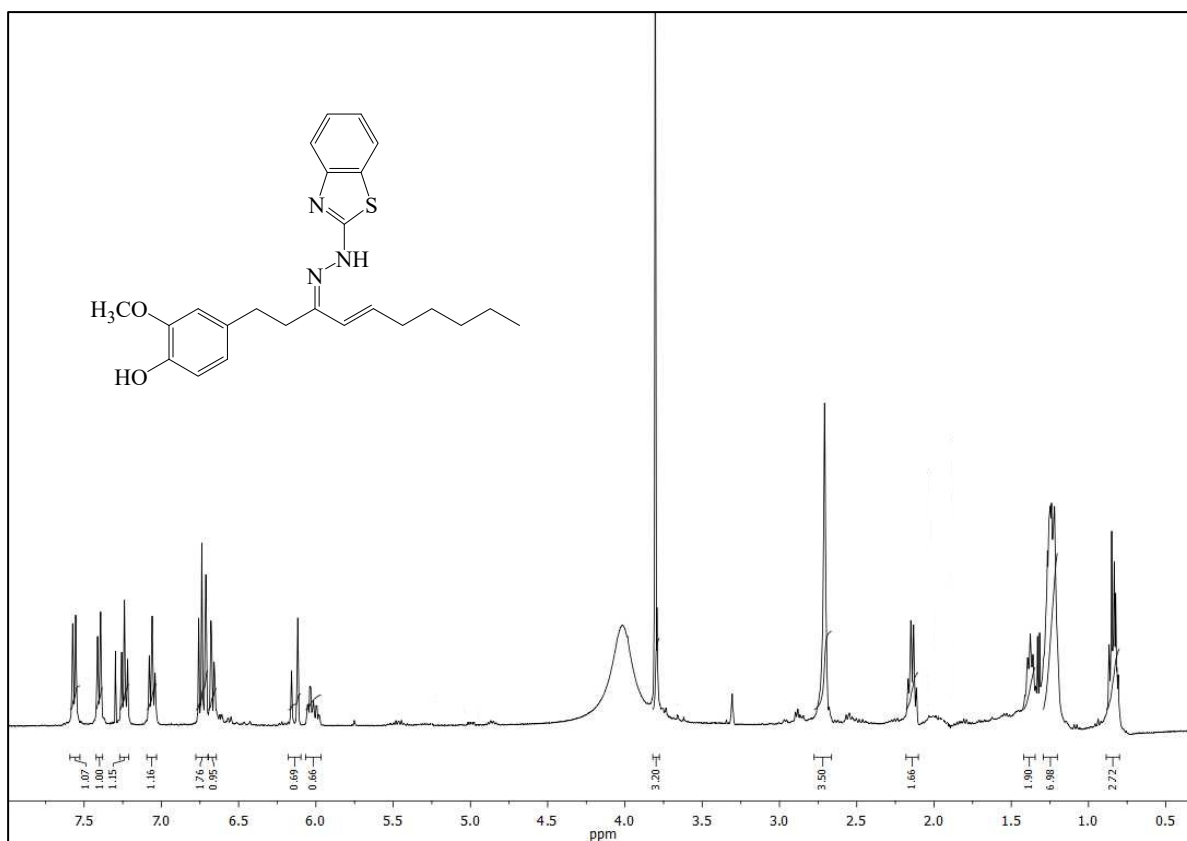

**Figure S17.**  $^1\text{H}$  NMR spectrum of **4d**.

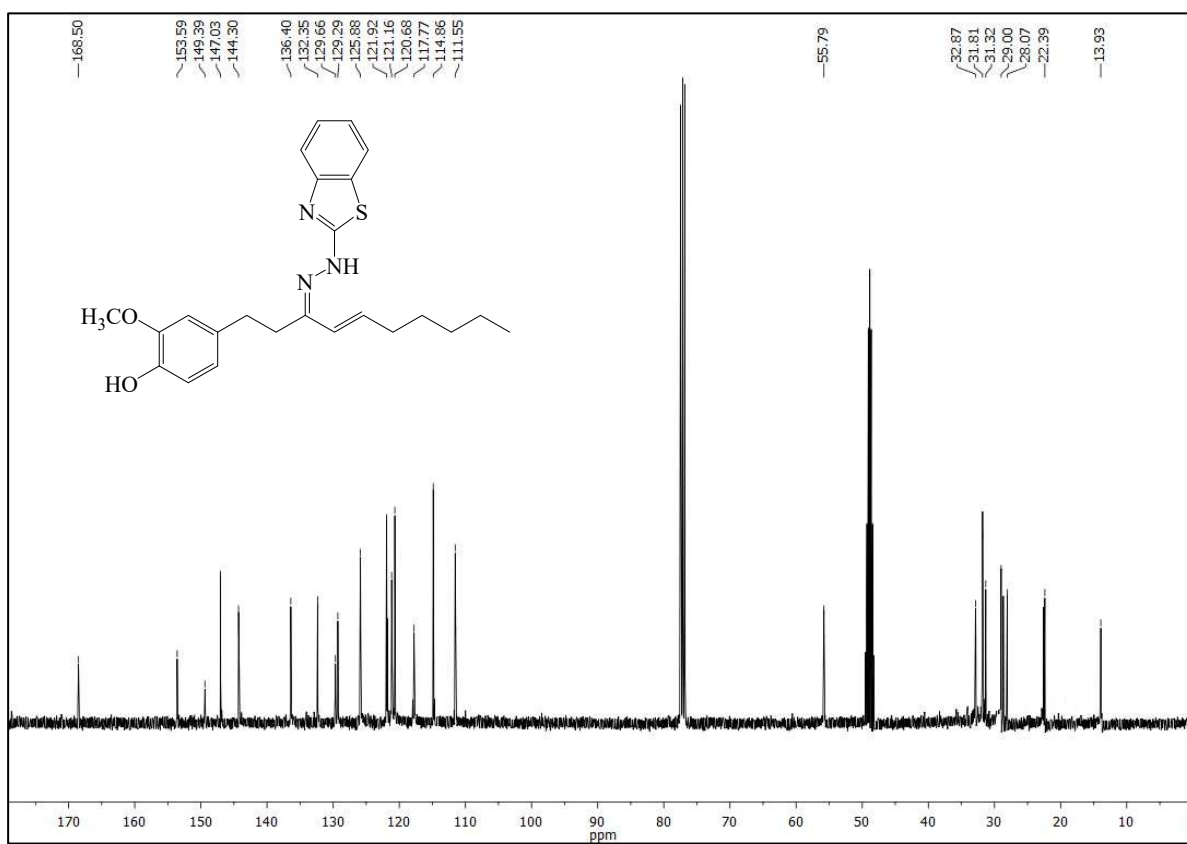

**Figure S18.**  $^{13}\text{C}$  NMR spectrum of **4d**.

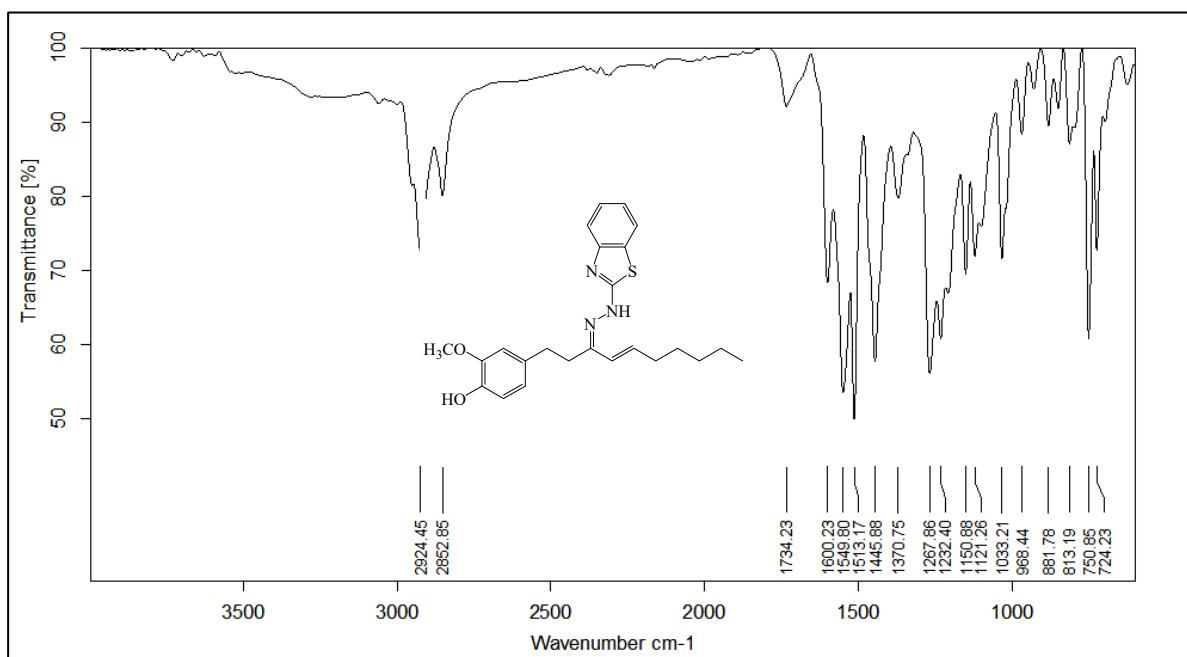

**Figure S19.** IR spectrum of **4d**.

#

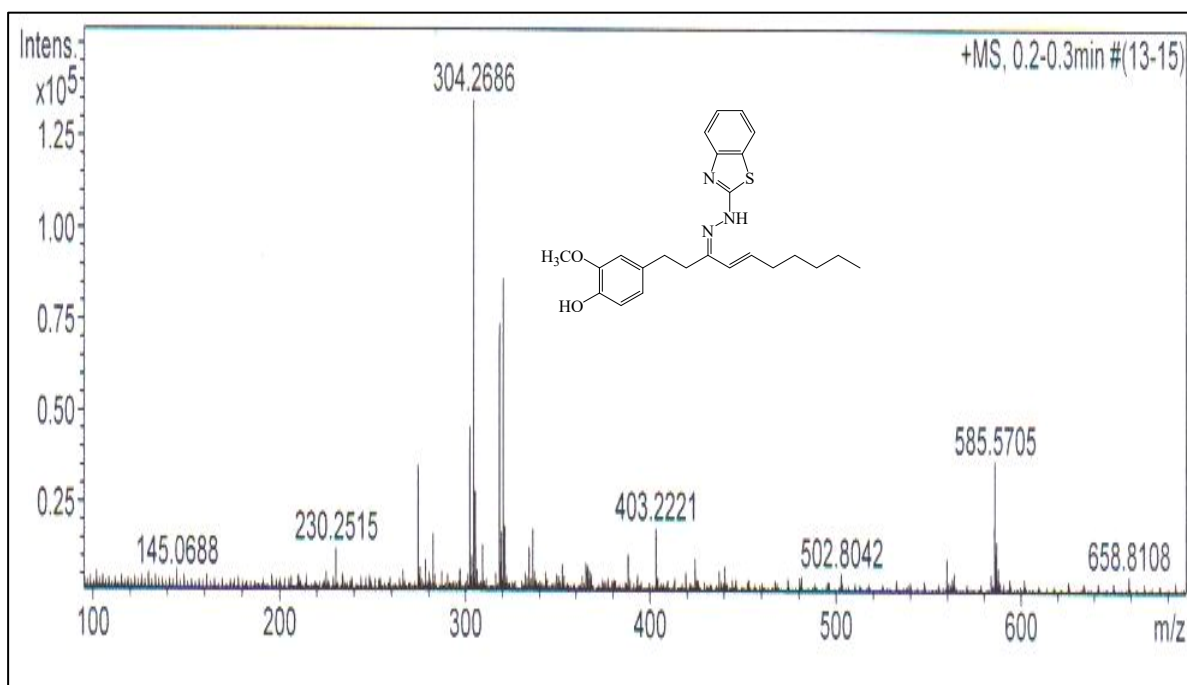

**Figure S20.** Mass spectrum of **4d**.

#

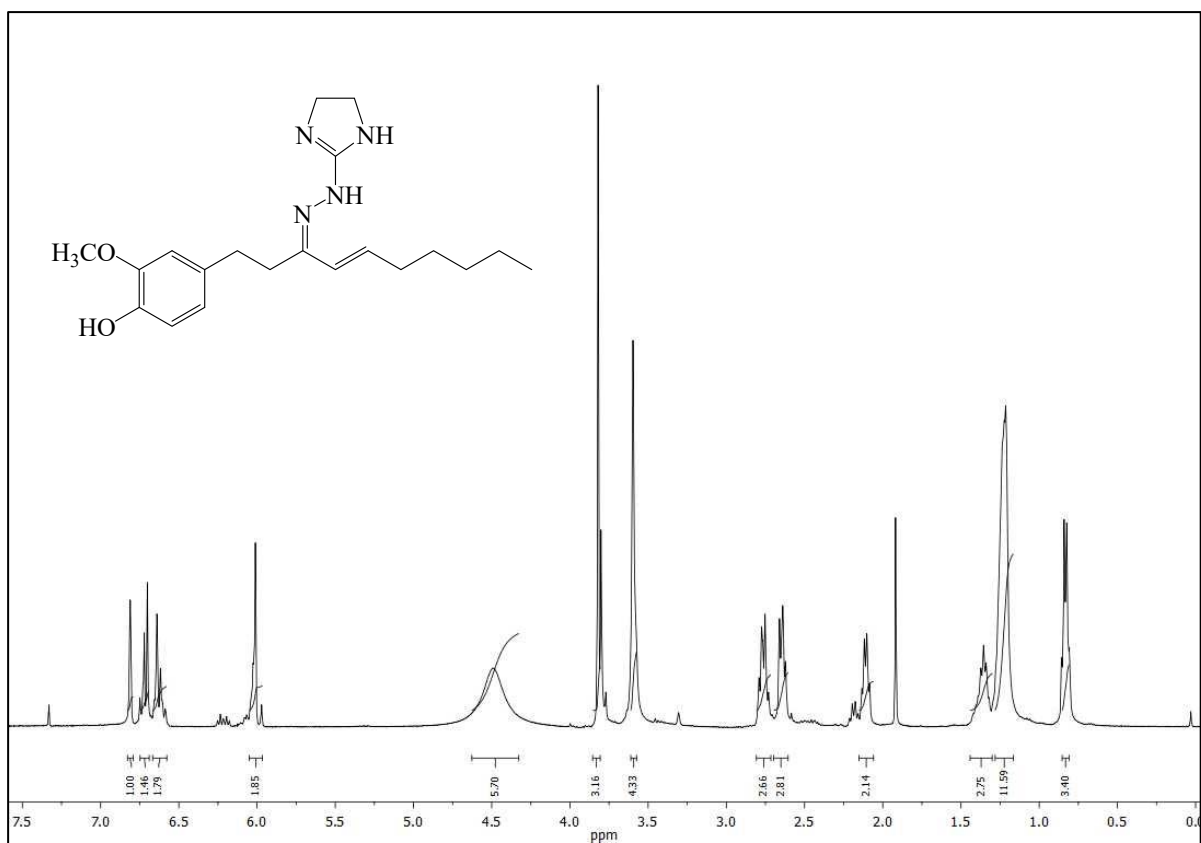

Figure S21. <sup>1</sup>H NMR spectrum of 4e.

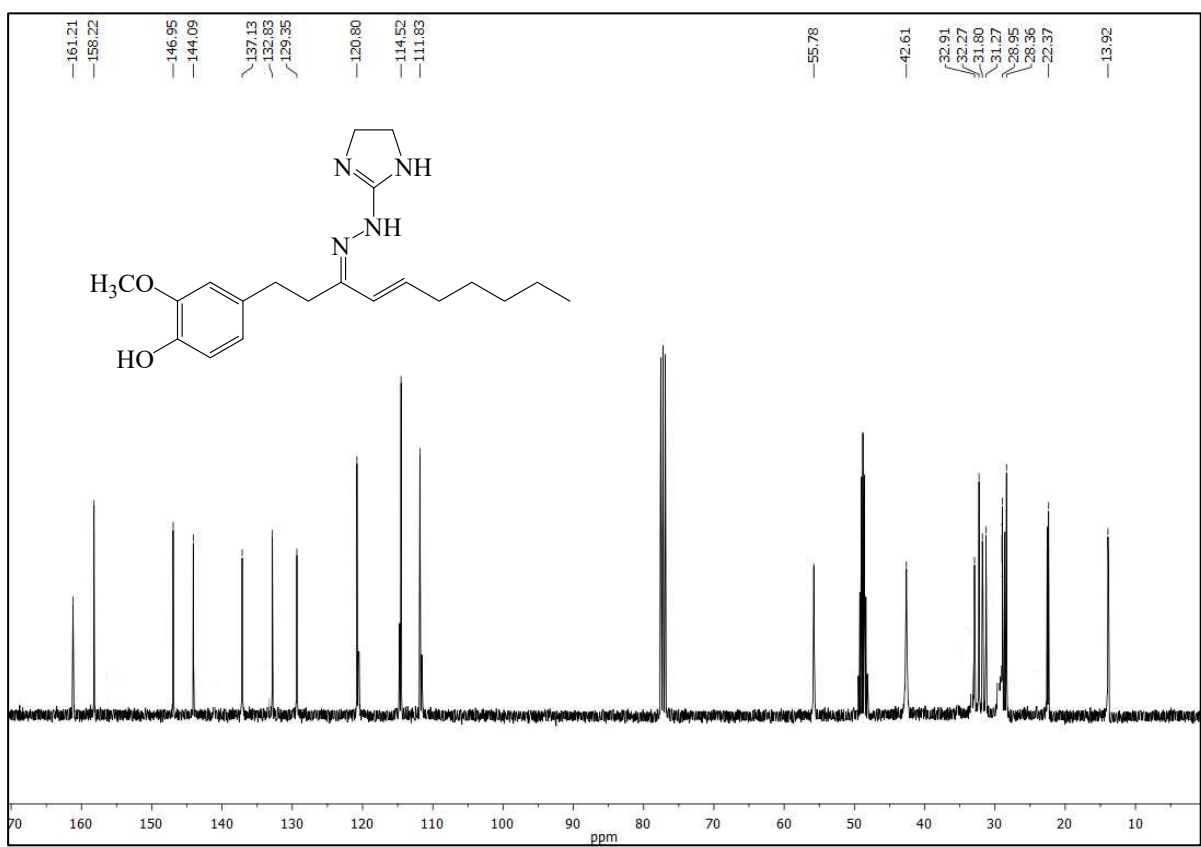

Figure S22. <sup>13</sup>C NMR spectrum of 4e.

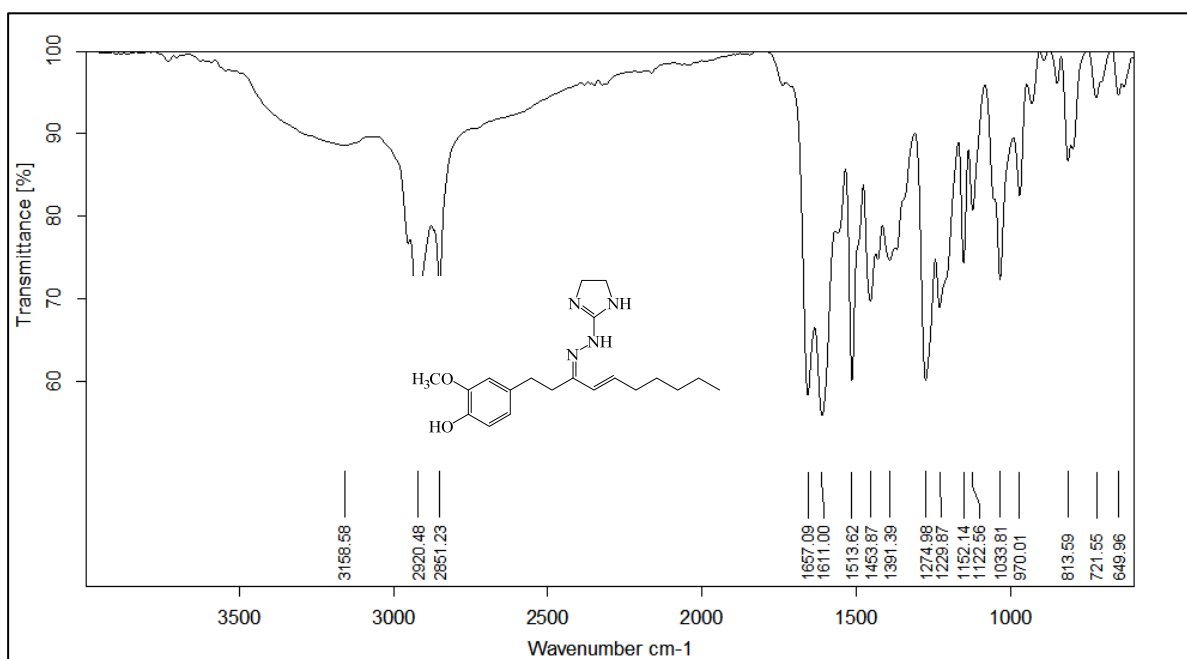

**Figure S23.** IR spectrum of **4e**.

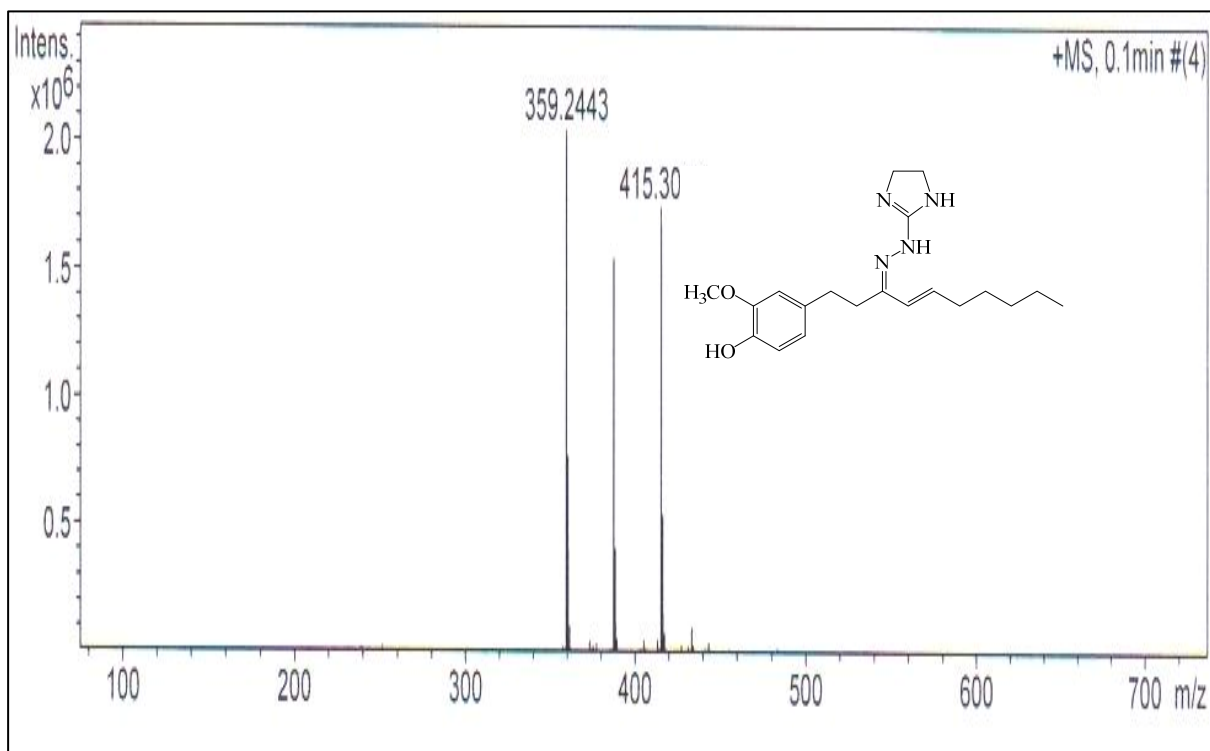

**Figure S24.** Mass spectrum of **4e**.

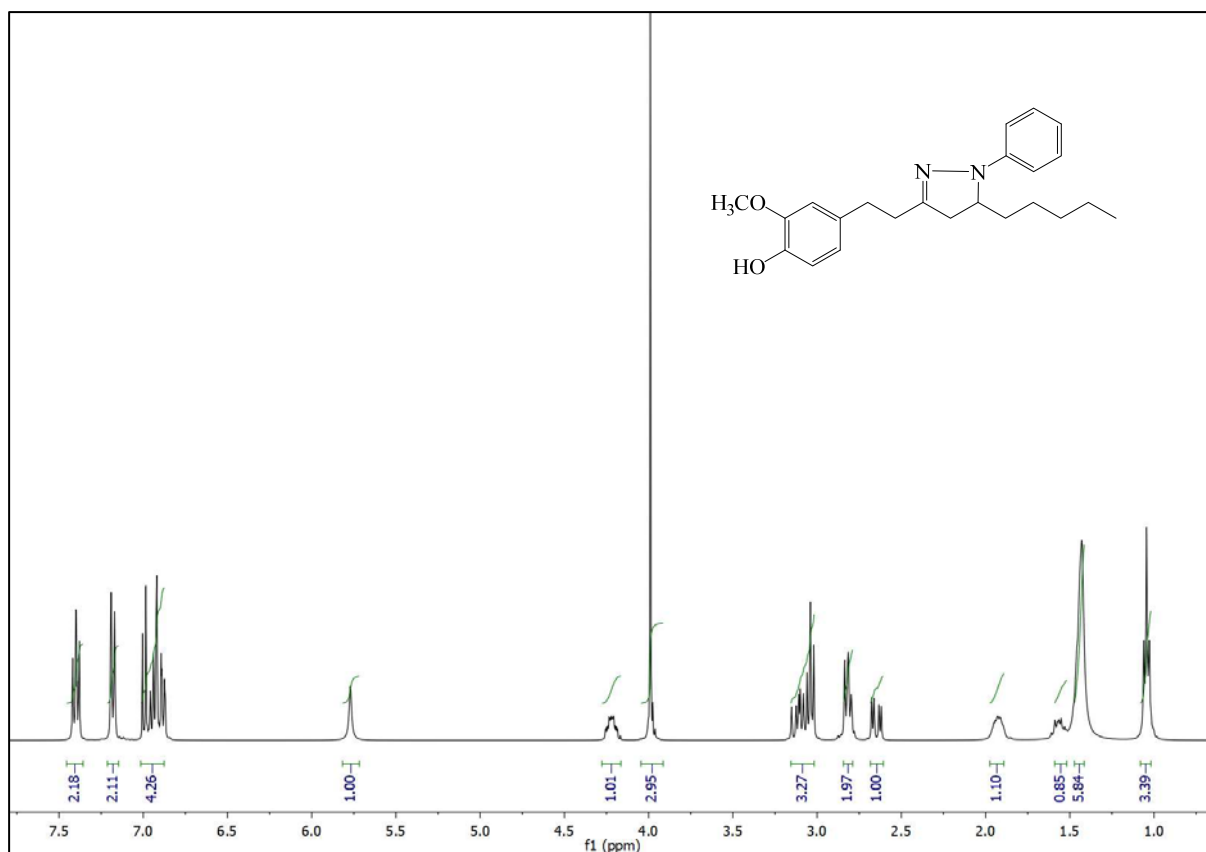

Figure S25. <sup>1</sup>H NMR spectrum of 5a.

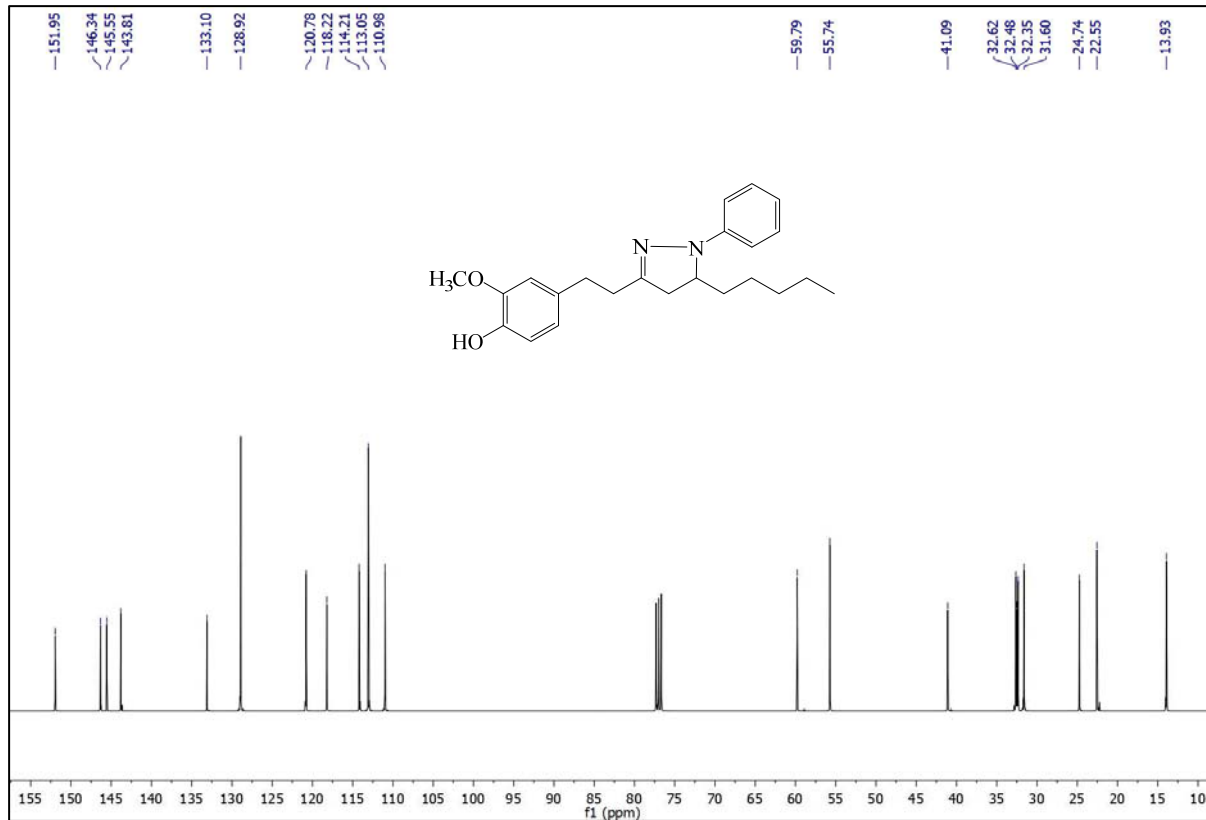

Figure S26. <sup>13</sup>C NMR spectrum of 5a.

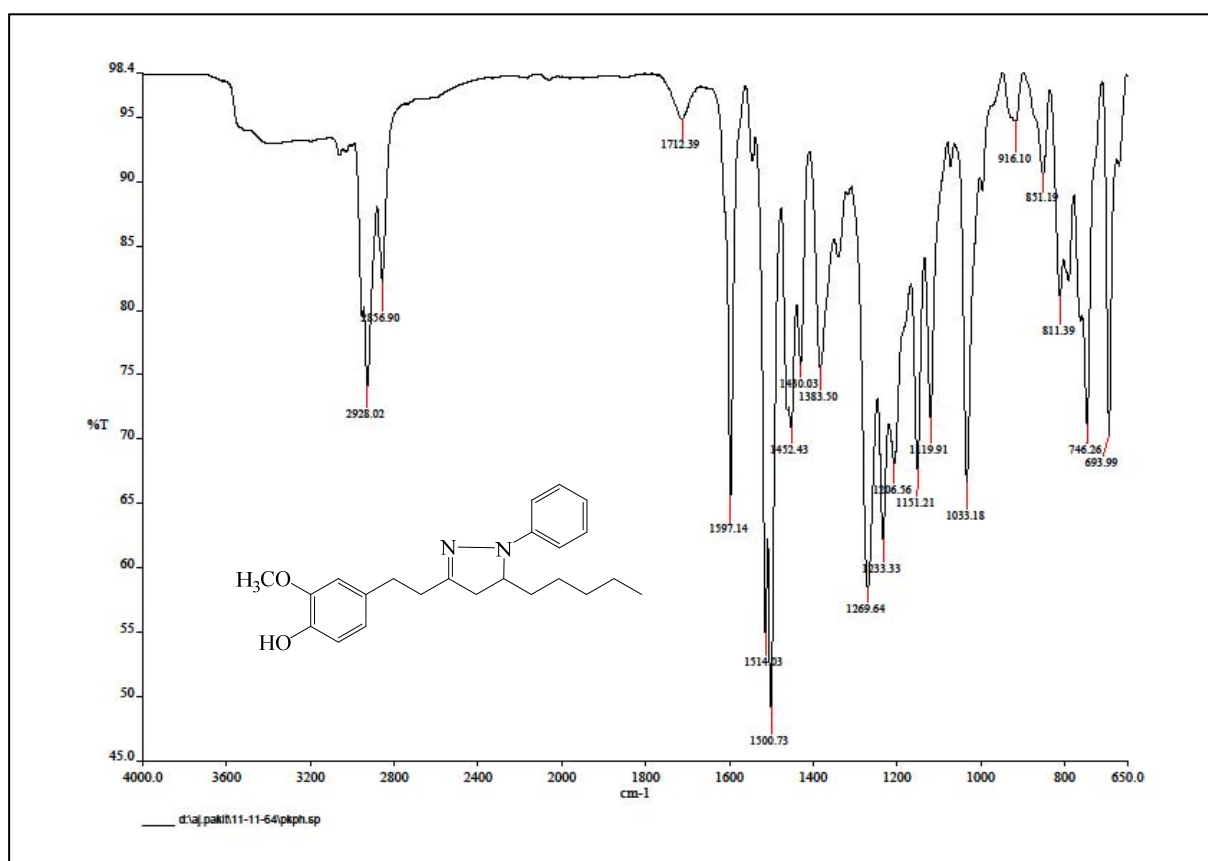

Figure S27. IR spectrum of 5a.

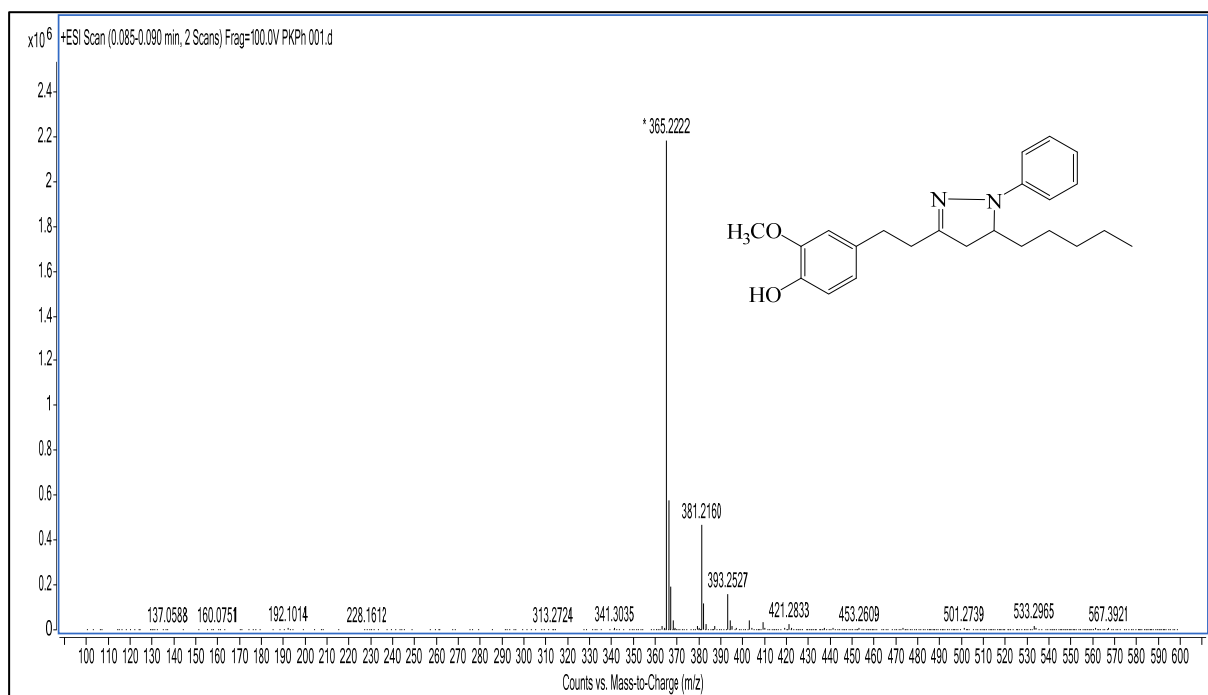

Figure S28. Mass spectrum of 5a.

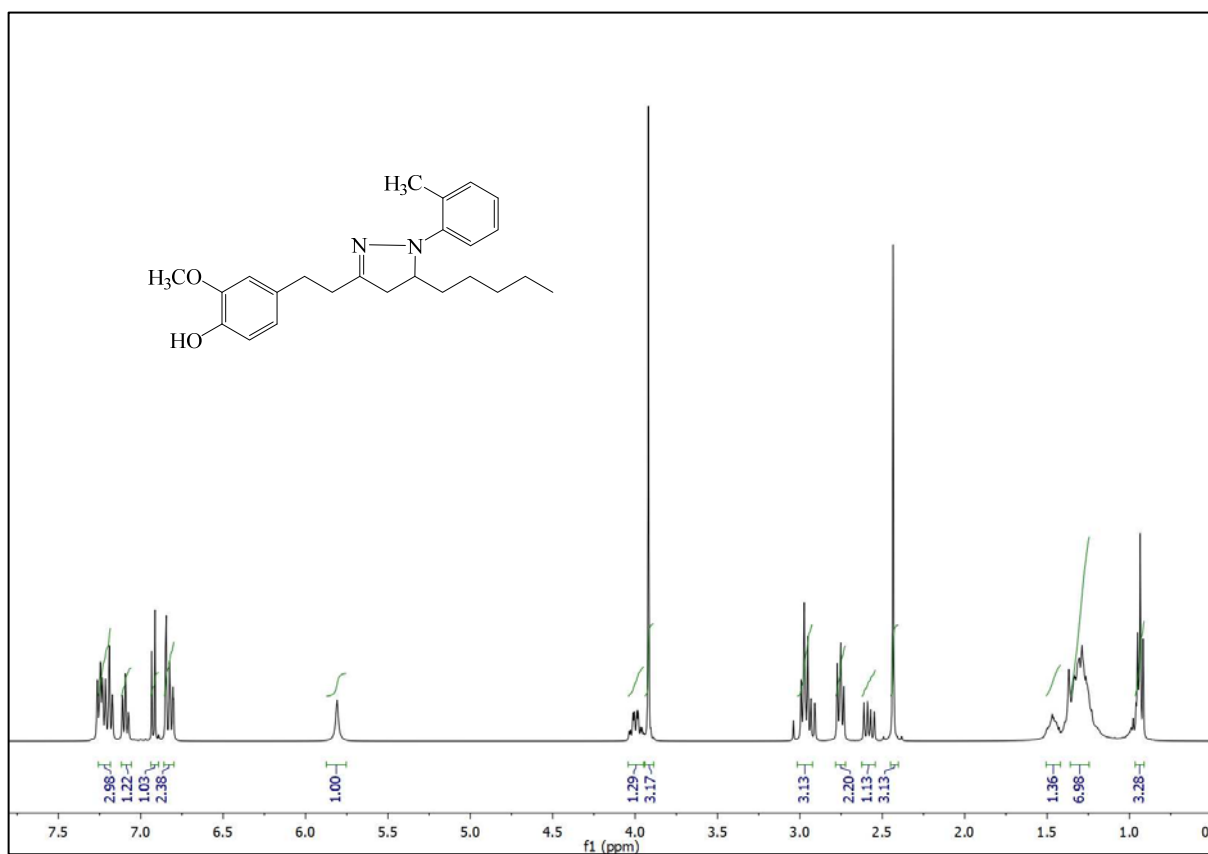

**Figure S29.** <sup>1</sup>H NMR spectrum of **5b**.

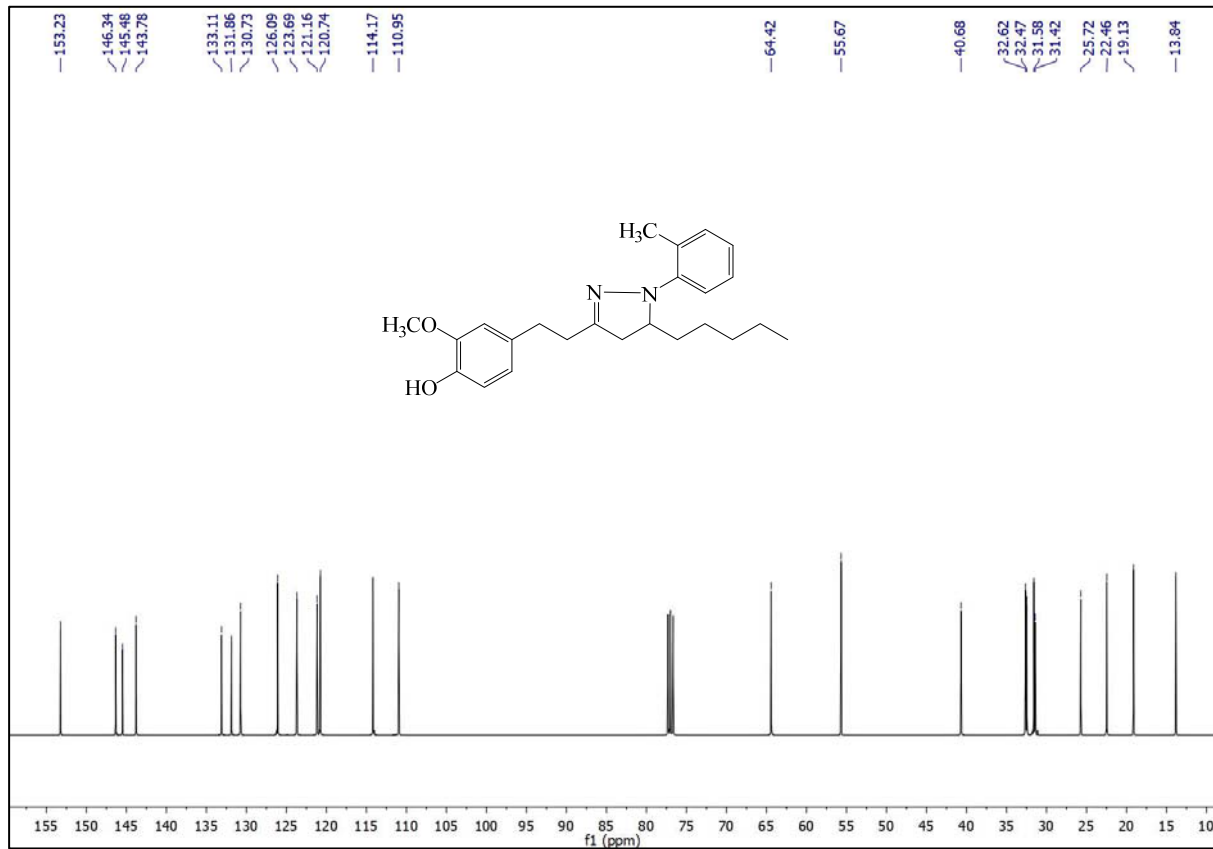

**Figure S30.** <sup>13</sup>C NMR spectrum of **5b**.

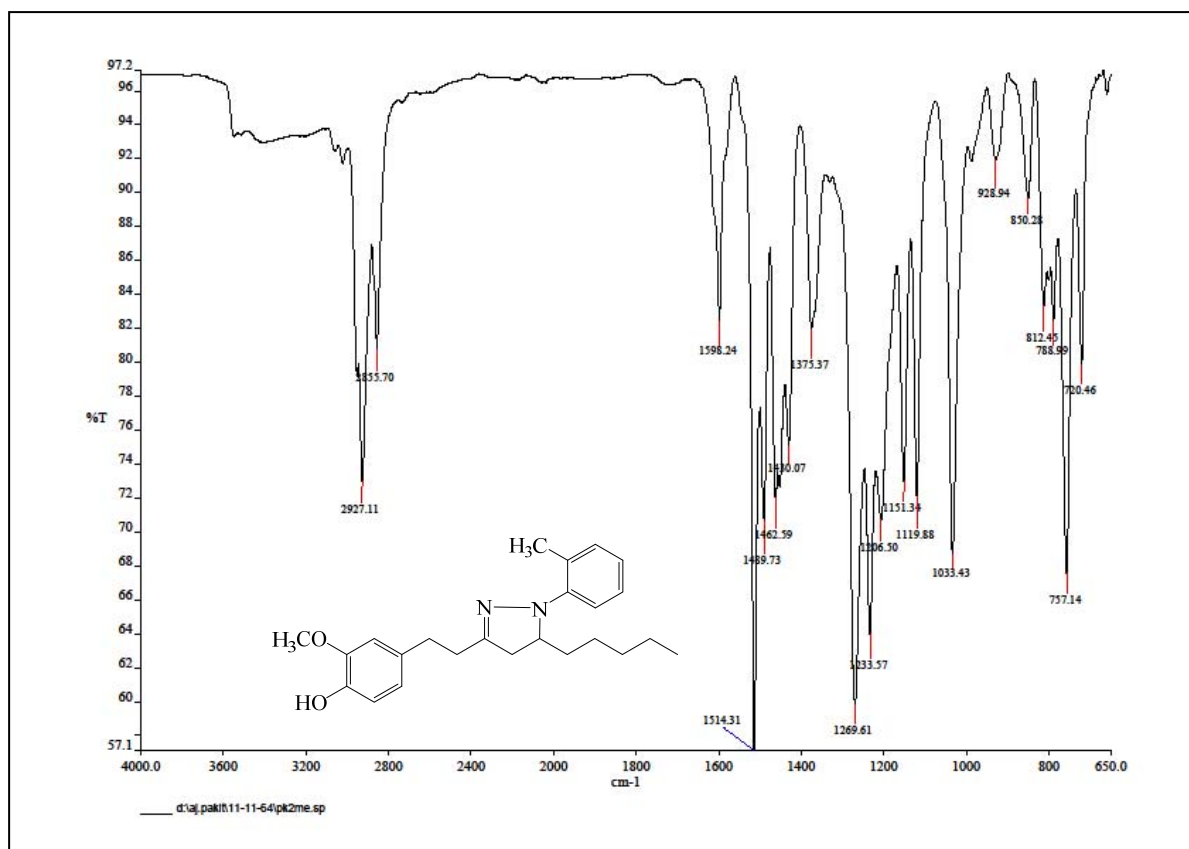

**Figure S31.** IR spectrum of **5b**.

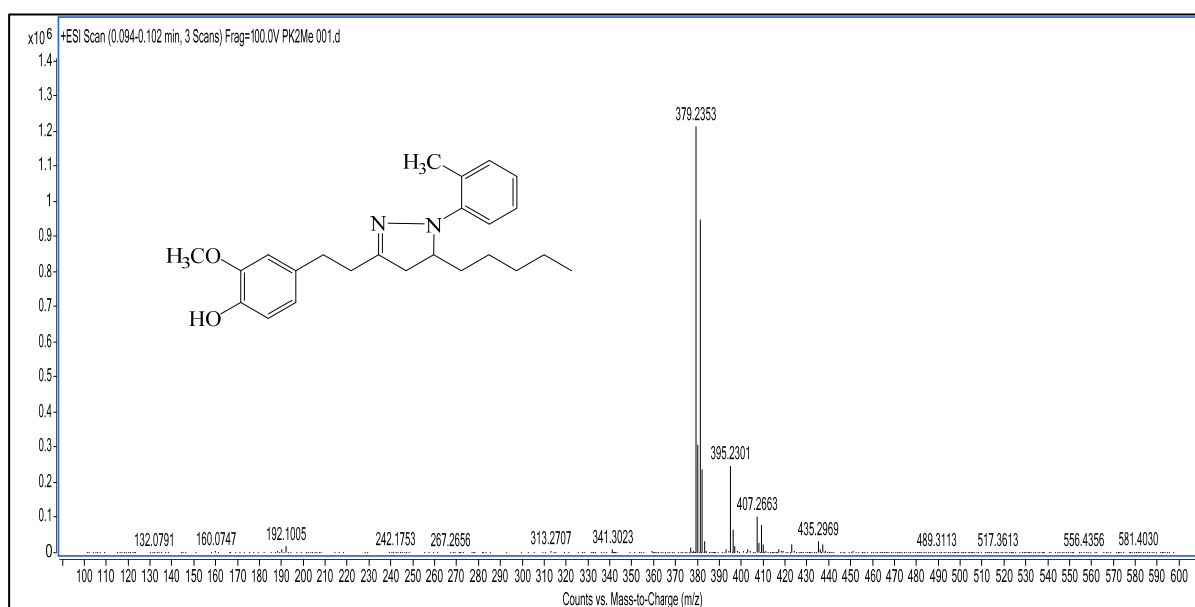

**Figure S32.** Mass spectrum of **5b**.

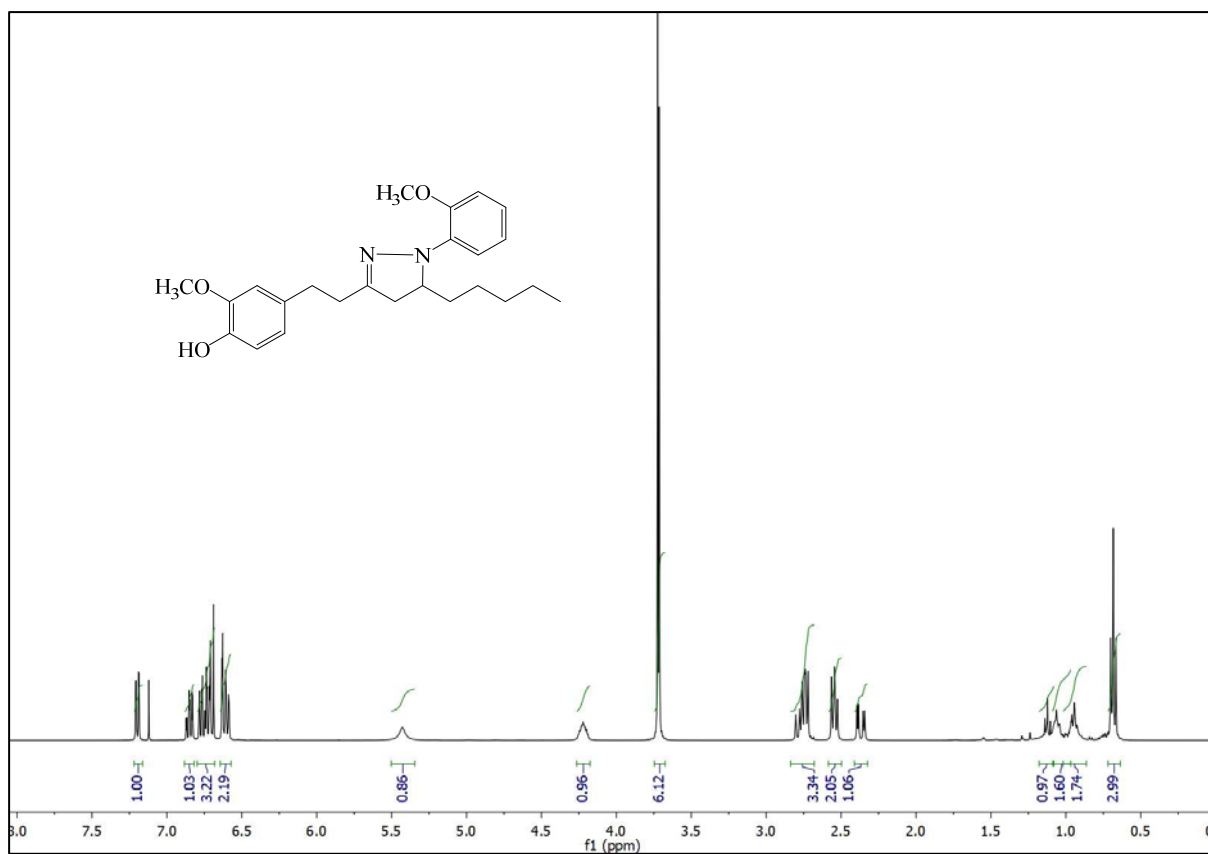

**Figure S33.** <sup>1</sup>H NMR spectrum of **5c**.

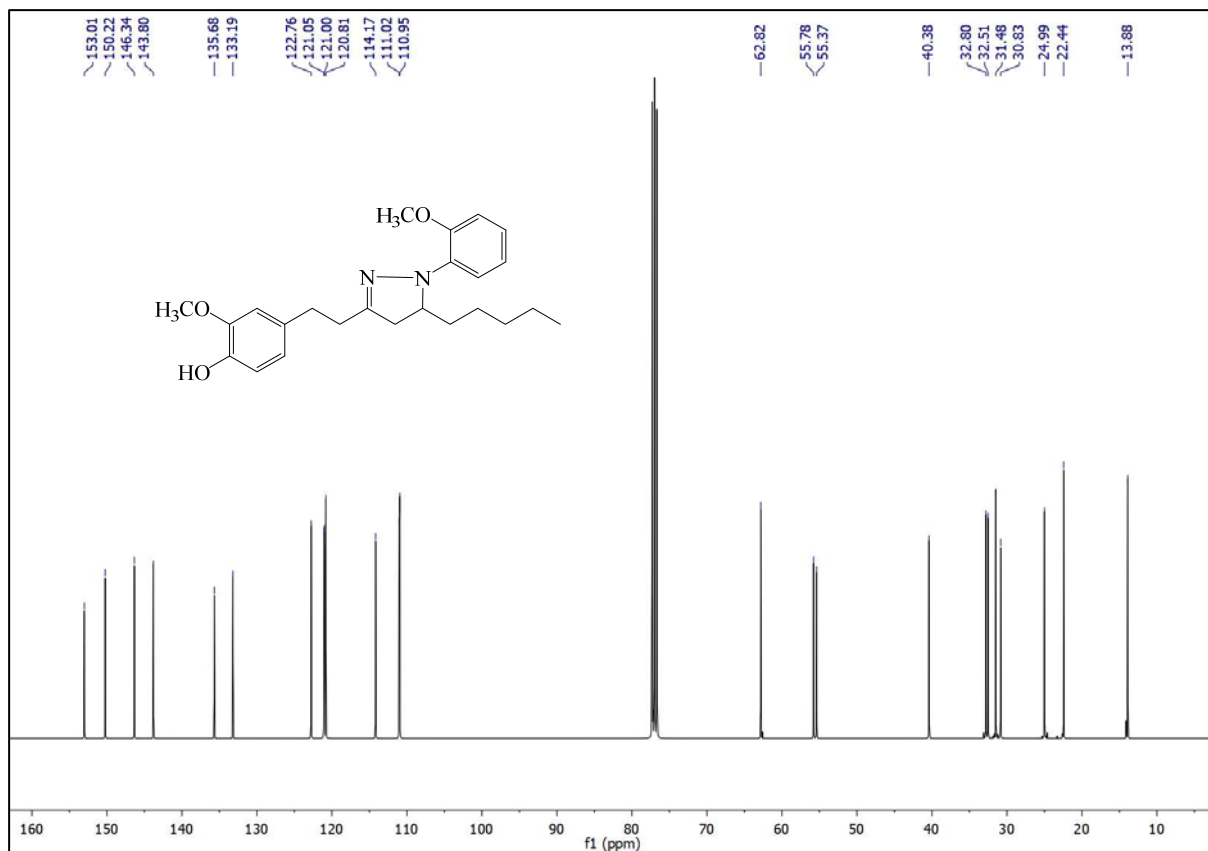

**Figure S34.** <sup>13</sup>C NMR spectrum of **5c**.

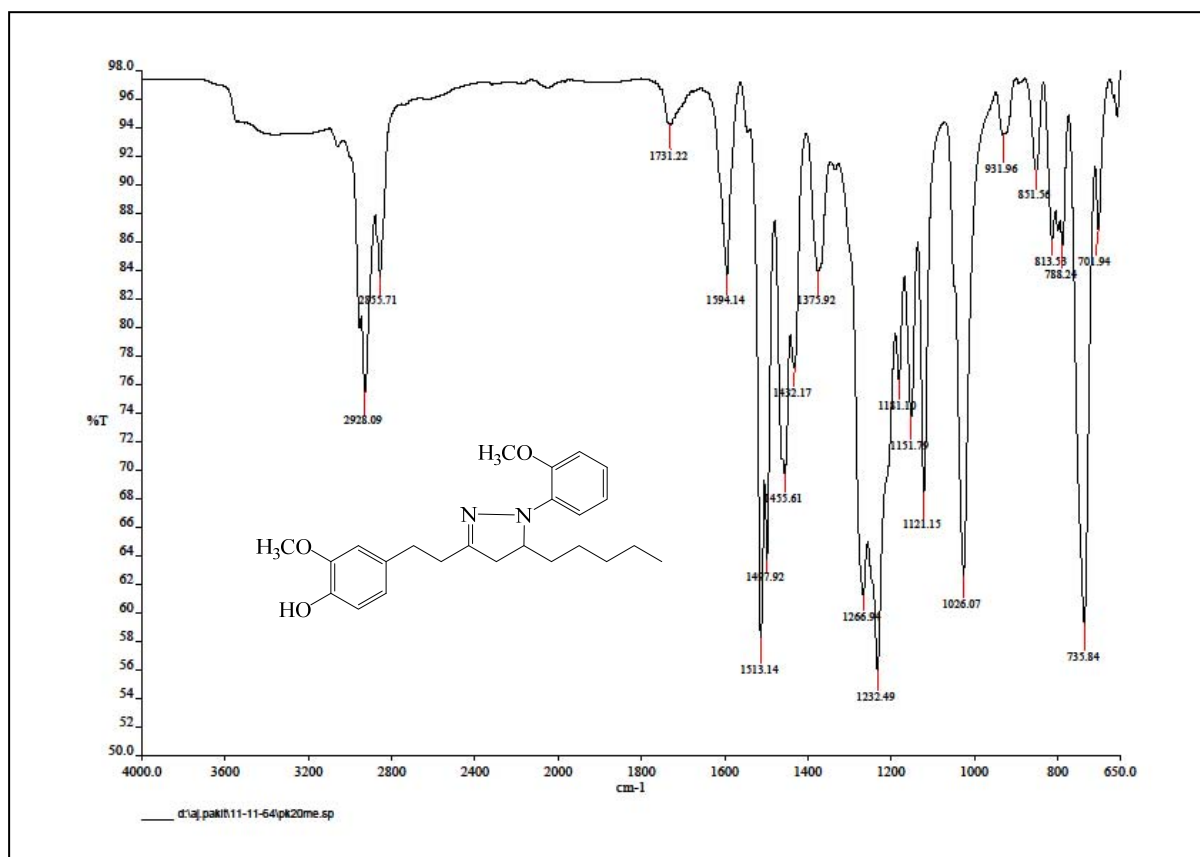

Figure S35. IR spectrum of 5c.

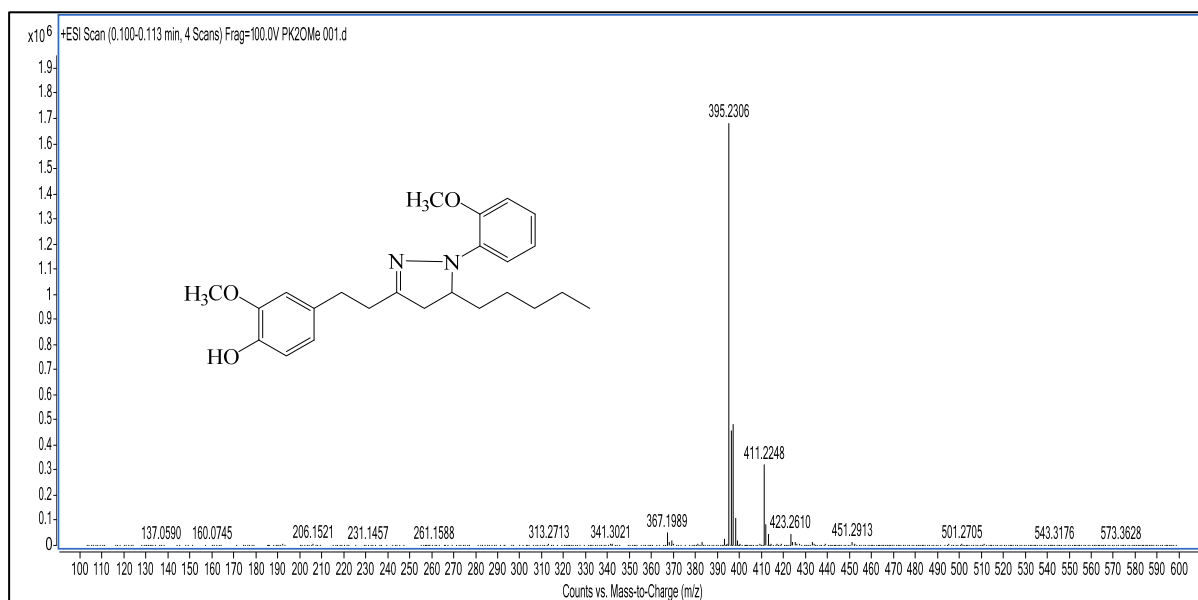

Figure S36. Mass spectrum of 5c.

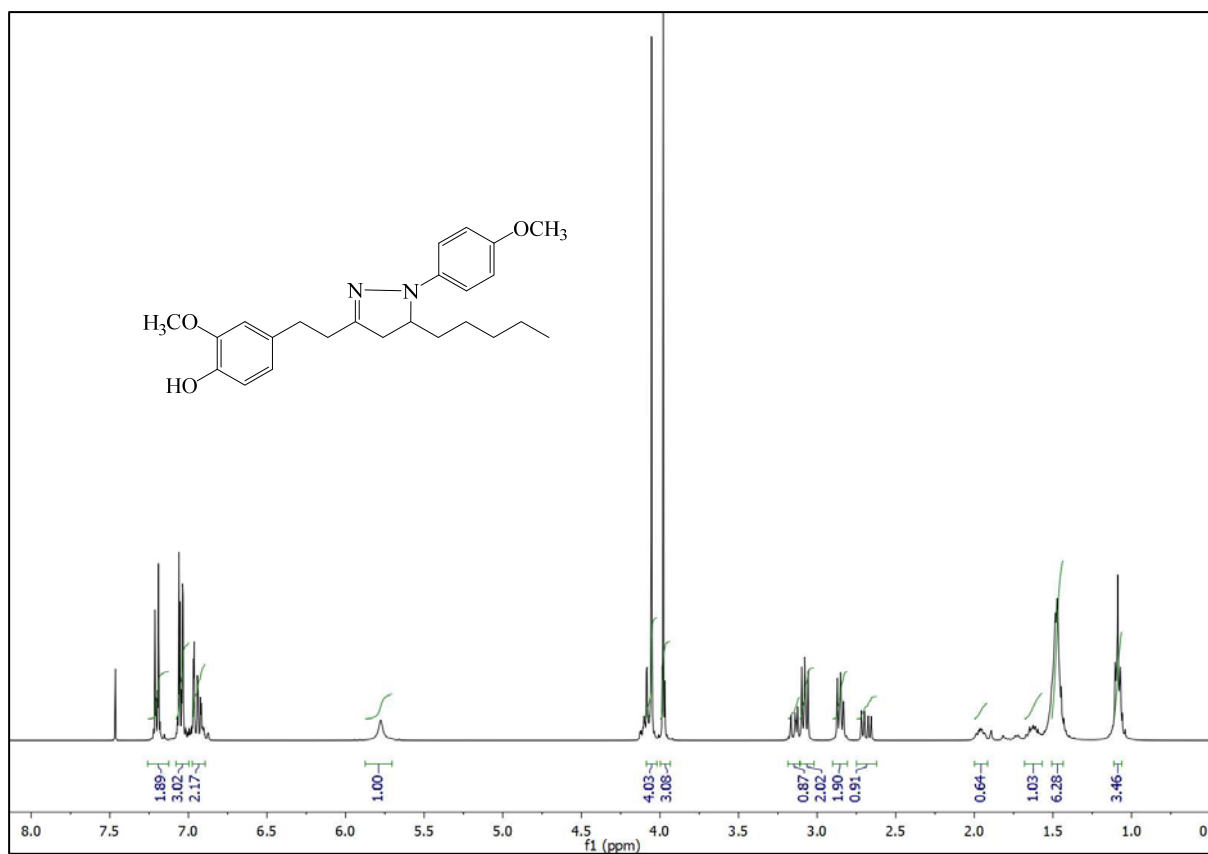

**Figure S37.** <sup>1</sup>H NMR spectrum of **5d**.

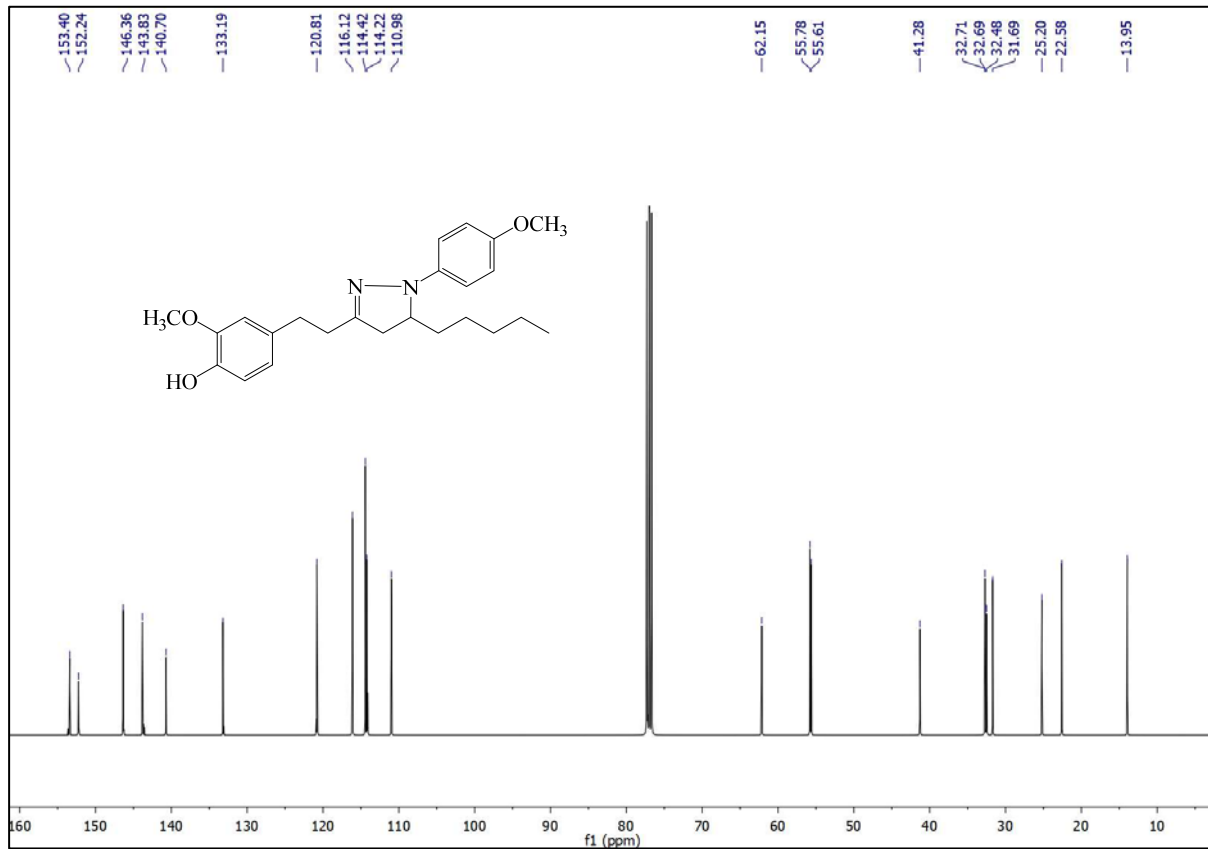

**Figure S38.** <sup>13</sup>C NMR spectrum of **5d**.

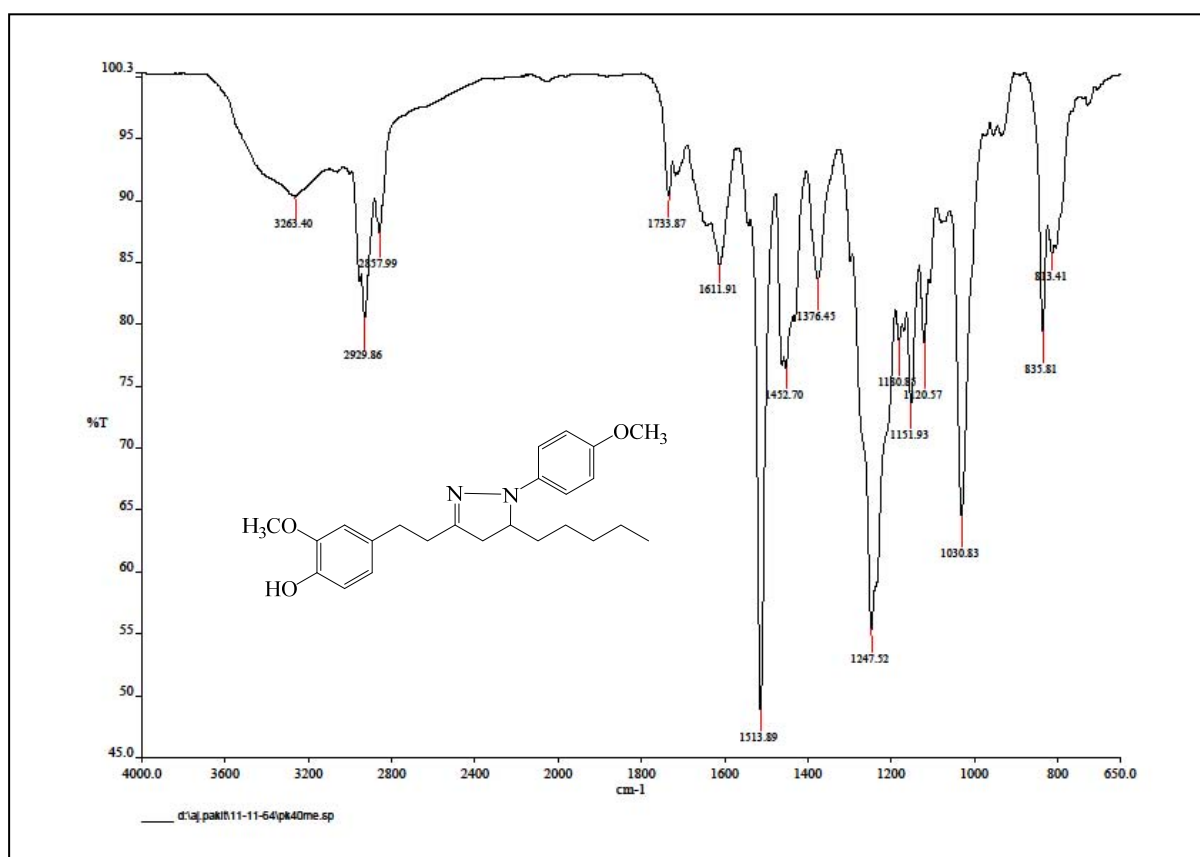

Figure S39. IR spectrum of 5d.

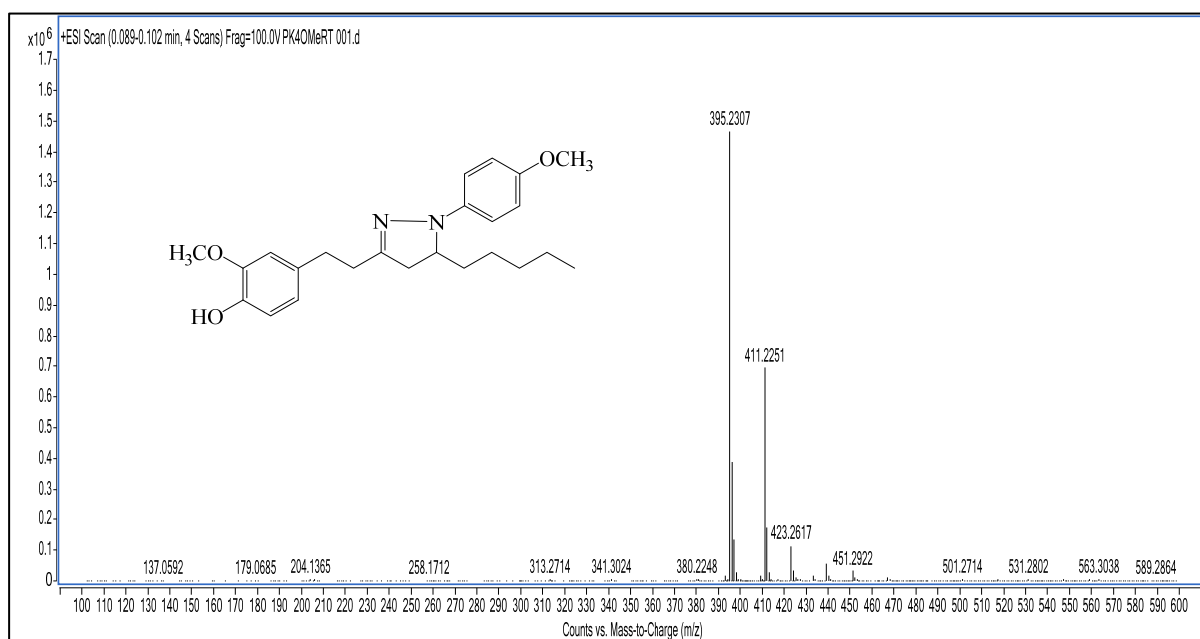

Figure S40. Mass spectrum of 5d.

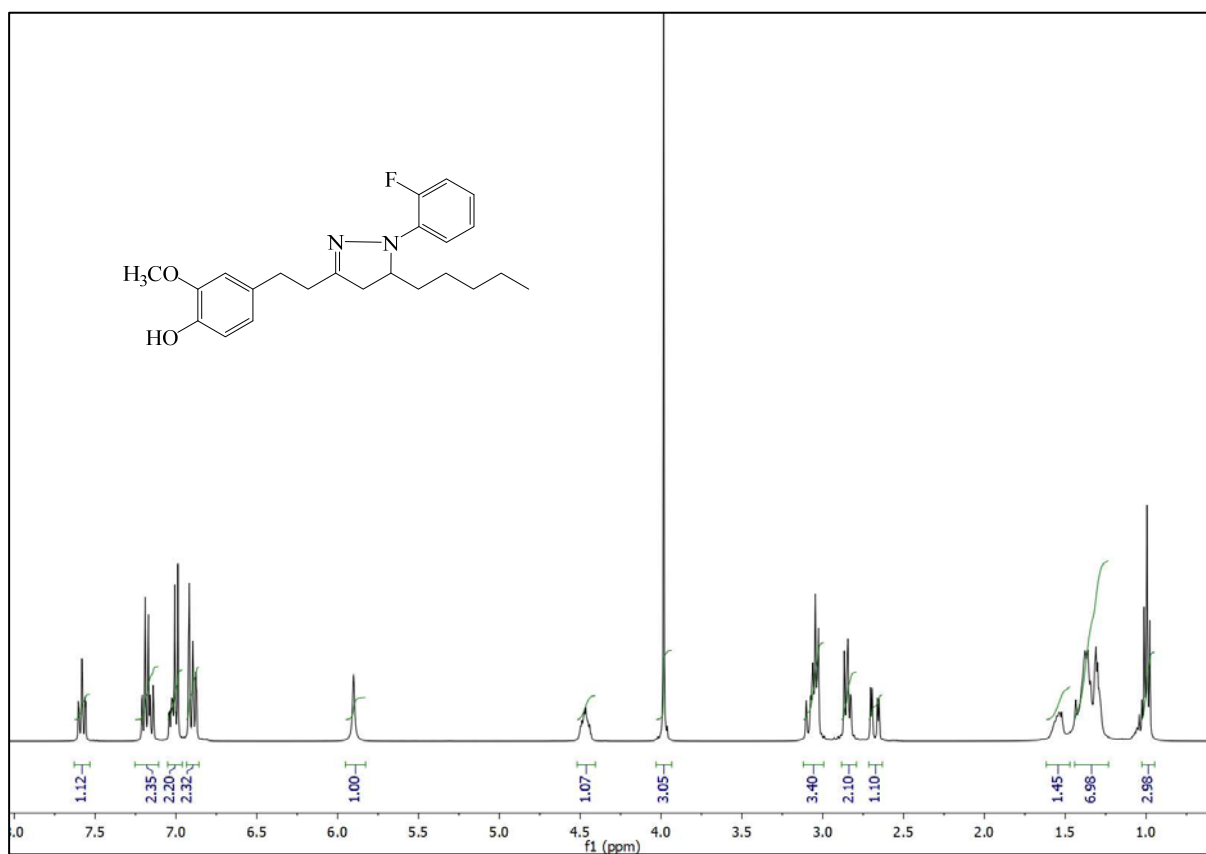

**Figure S41.** <sup>1</sup>H NMR spectrum of **5e**.

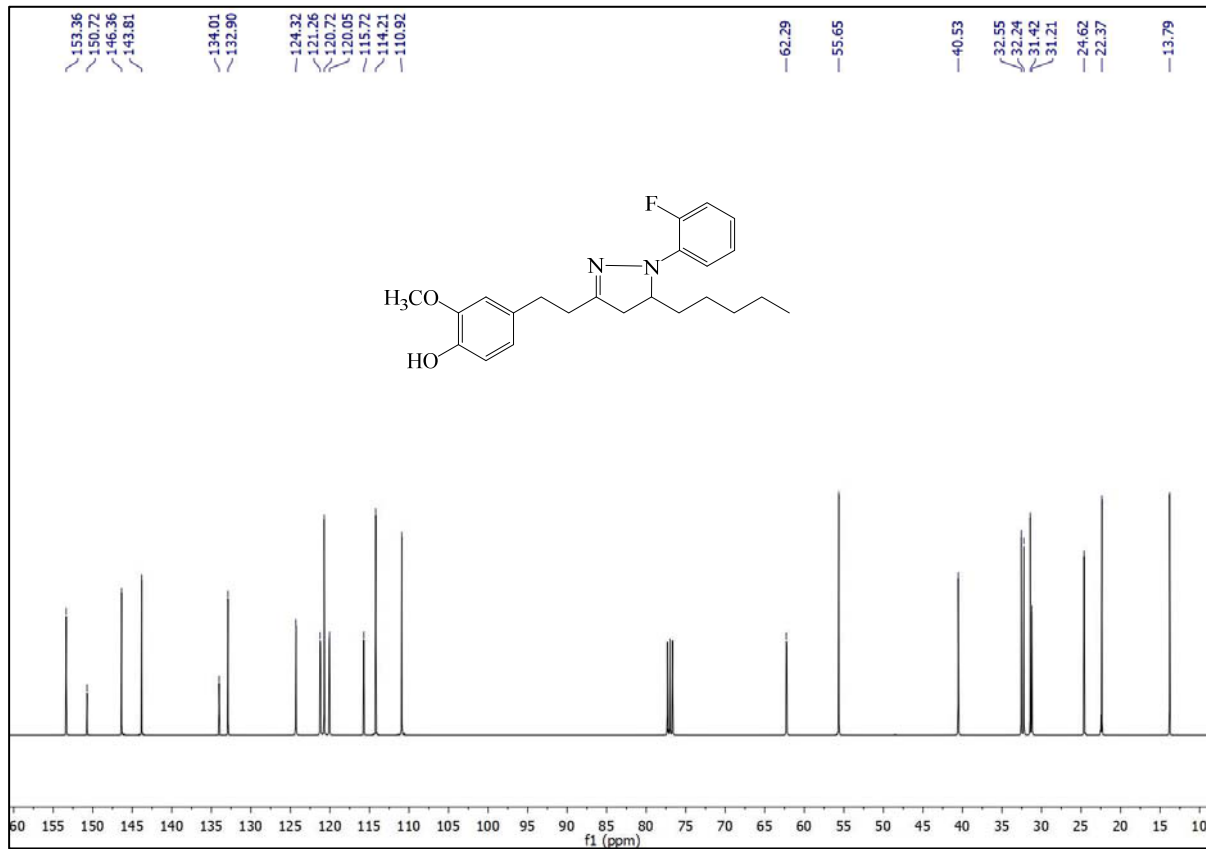

**Figure S42.** <sup>13</sup>C NMR spectrum of **5e**.

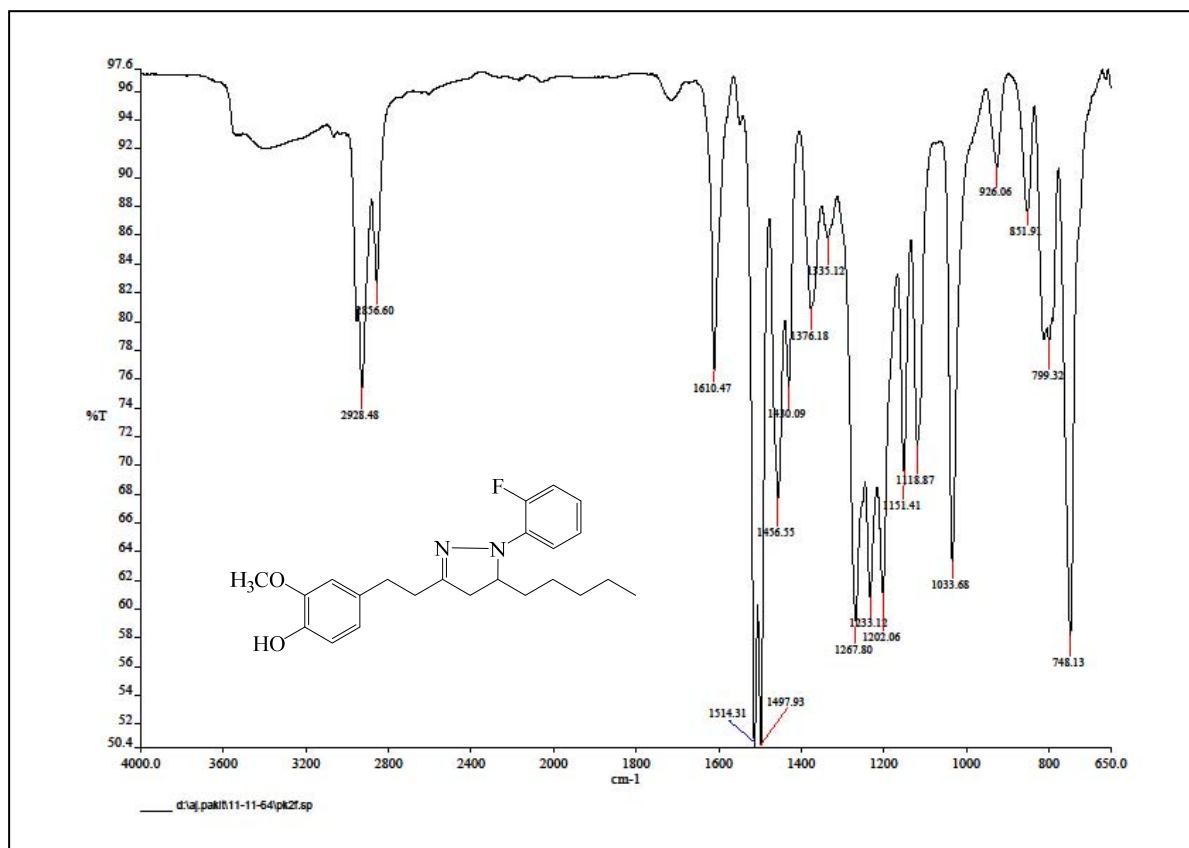

**Figure S43.** IR spectrum of **5e**.

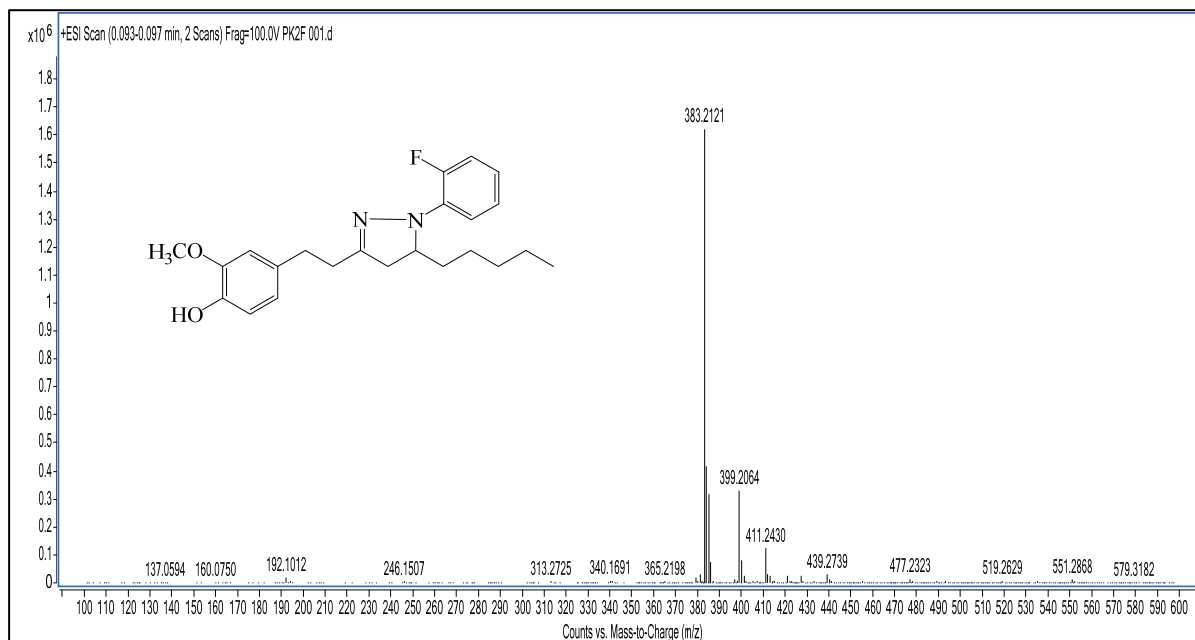

**Figure S44.** Mass spectrum of **5e**.

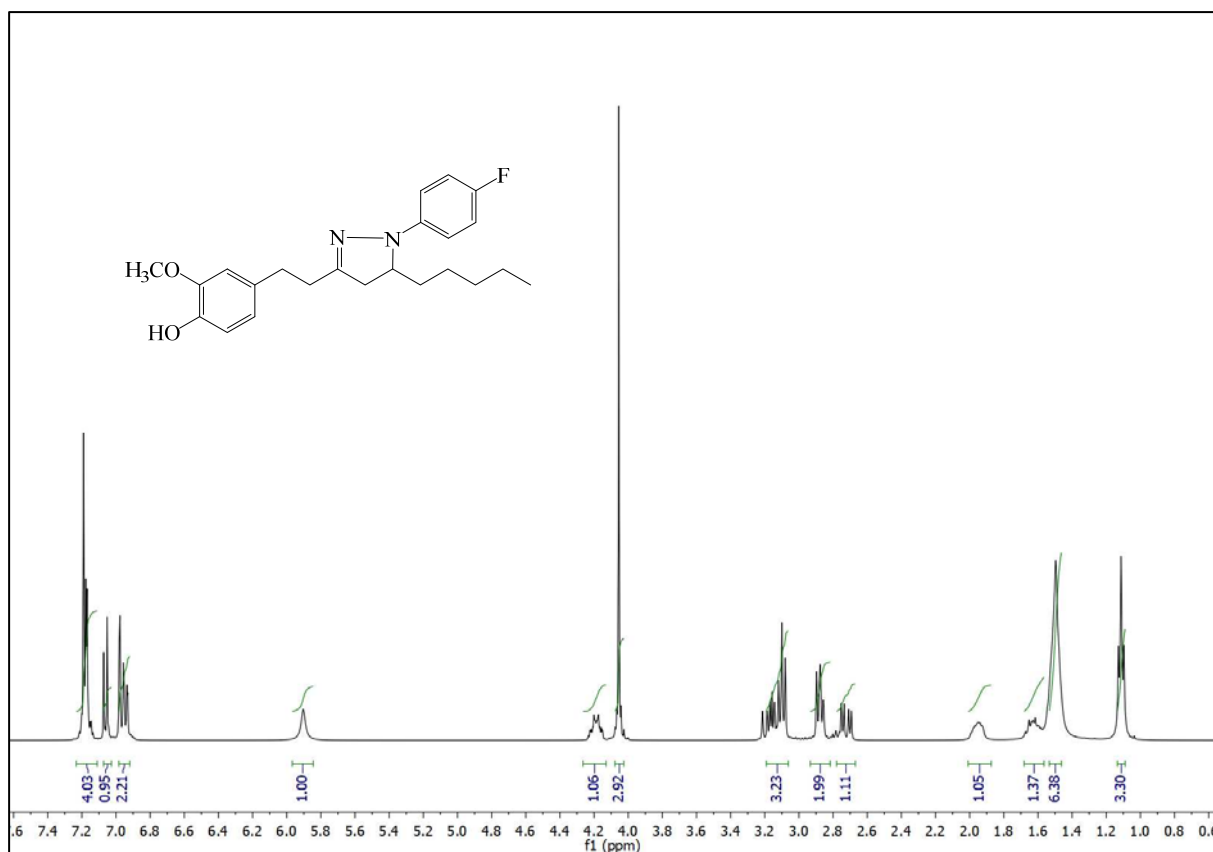

**Figure S45.** <sup>1</sup>H NMR spectrum of **5f**.

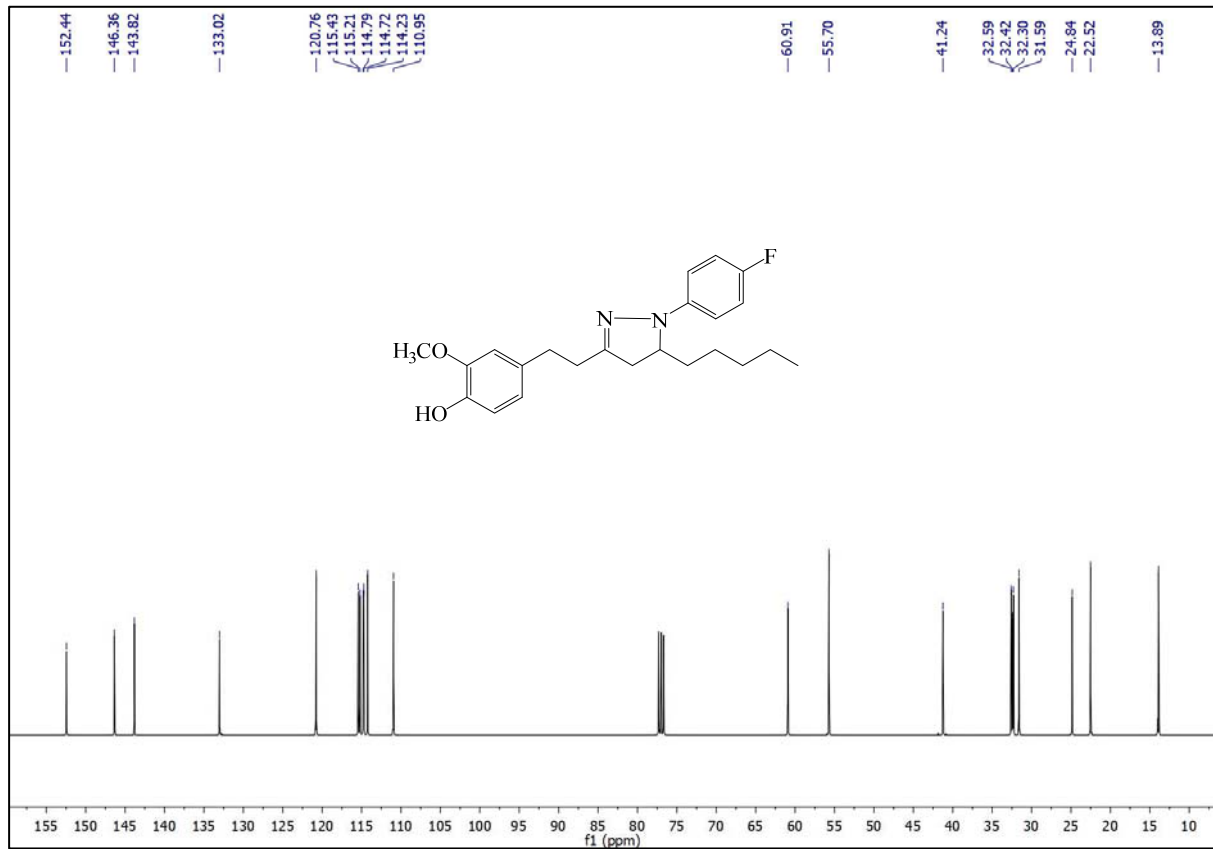

**Figure S46.** <sup>13</sup>C NMR spectrum of **5f**.

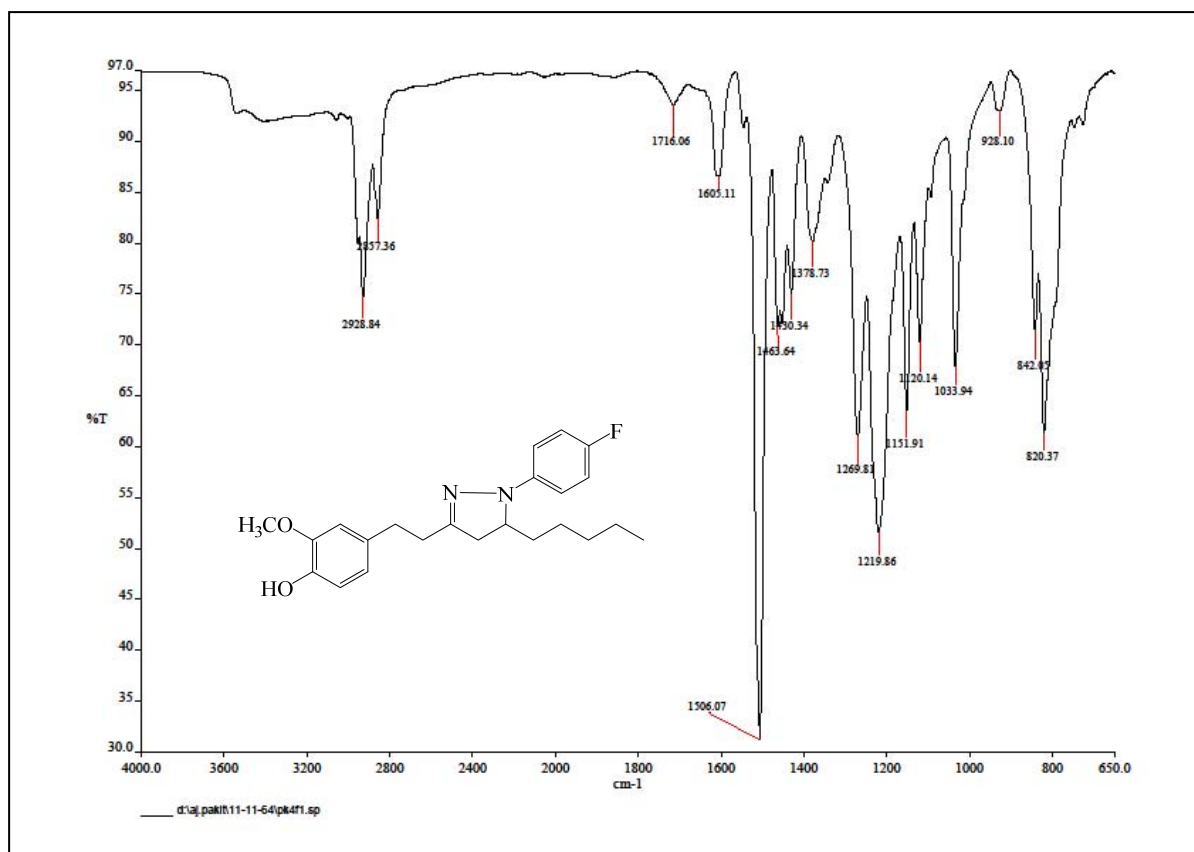

**Figure S47.** IR spectrum of **5f**.

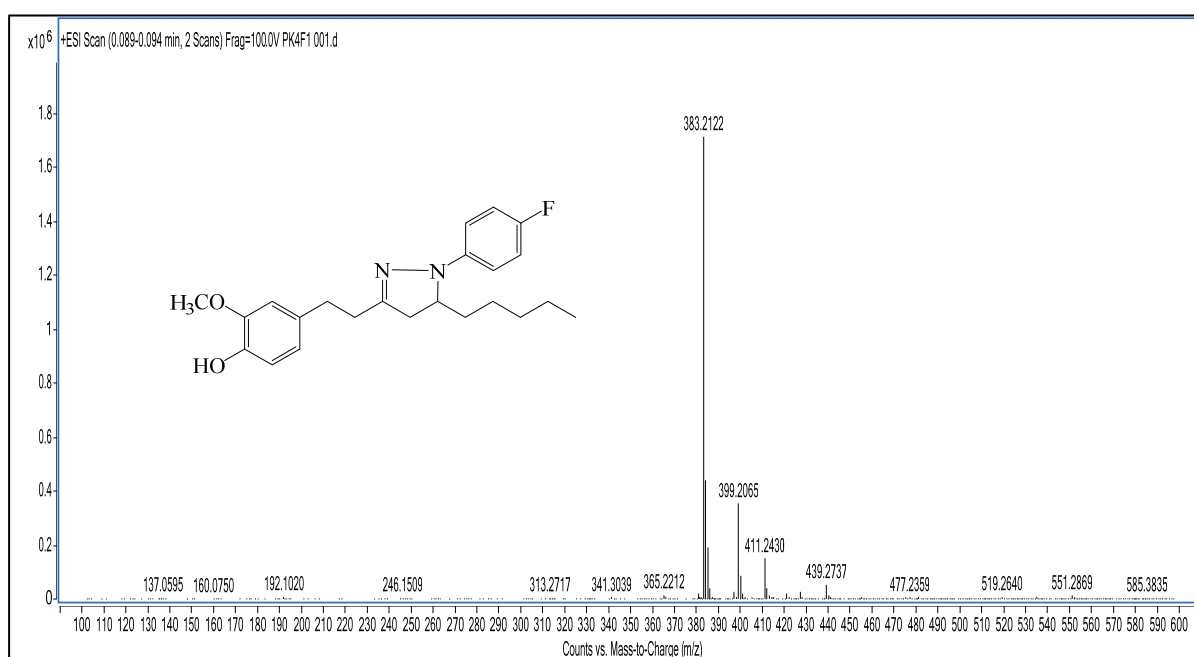

**Figure S48.** Mass spectrum of **5f**.

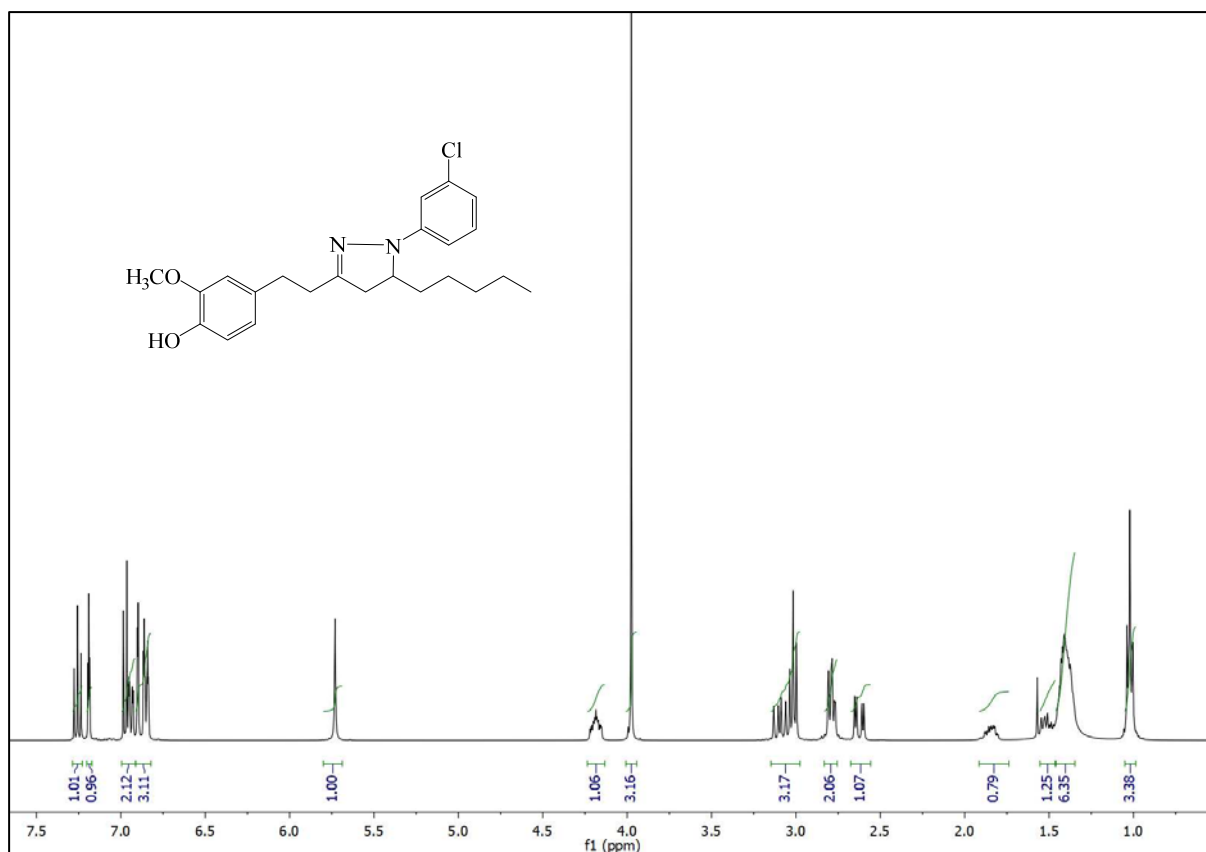

**Figure S49.** <sup>1</sup>H NMR spectrum of **5g**.

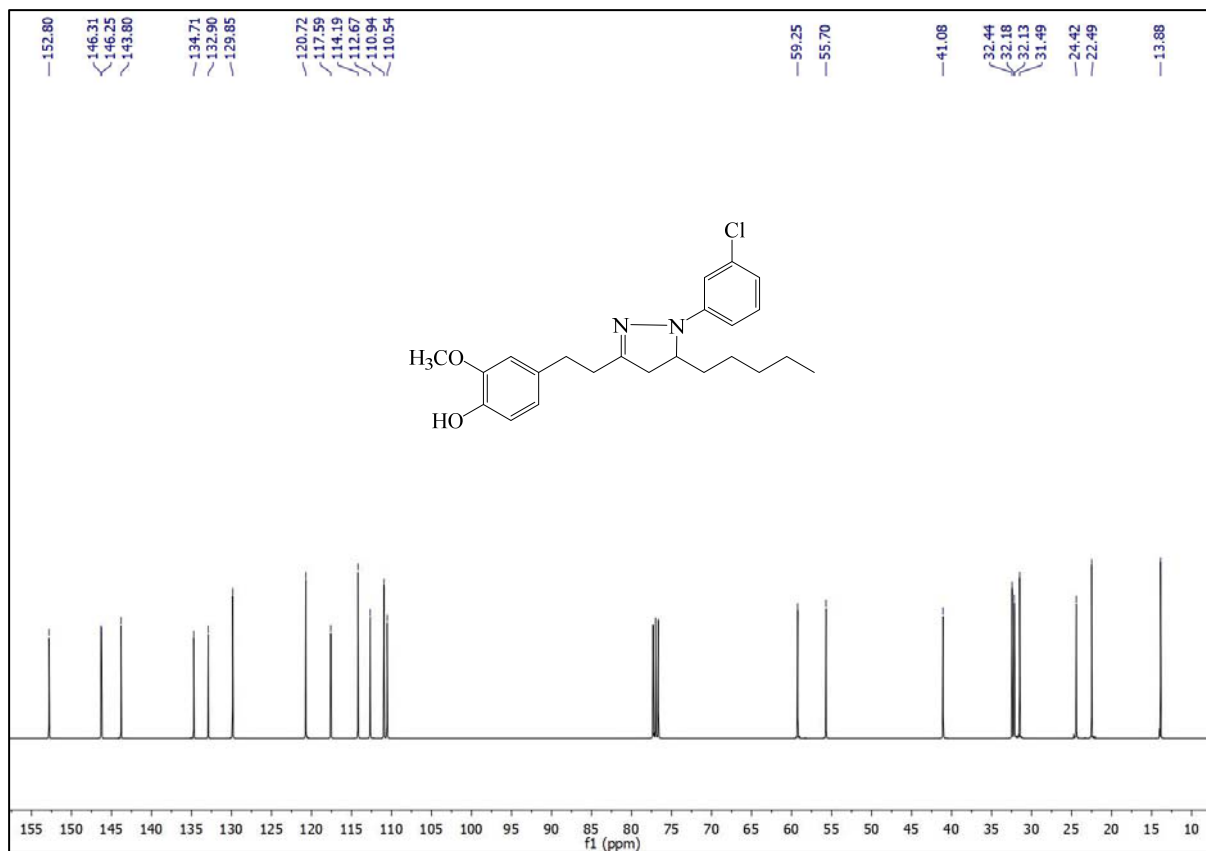

**Figure S50.** <sup>13</sup>C NMR spectrum of **5g**.

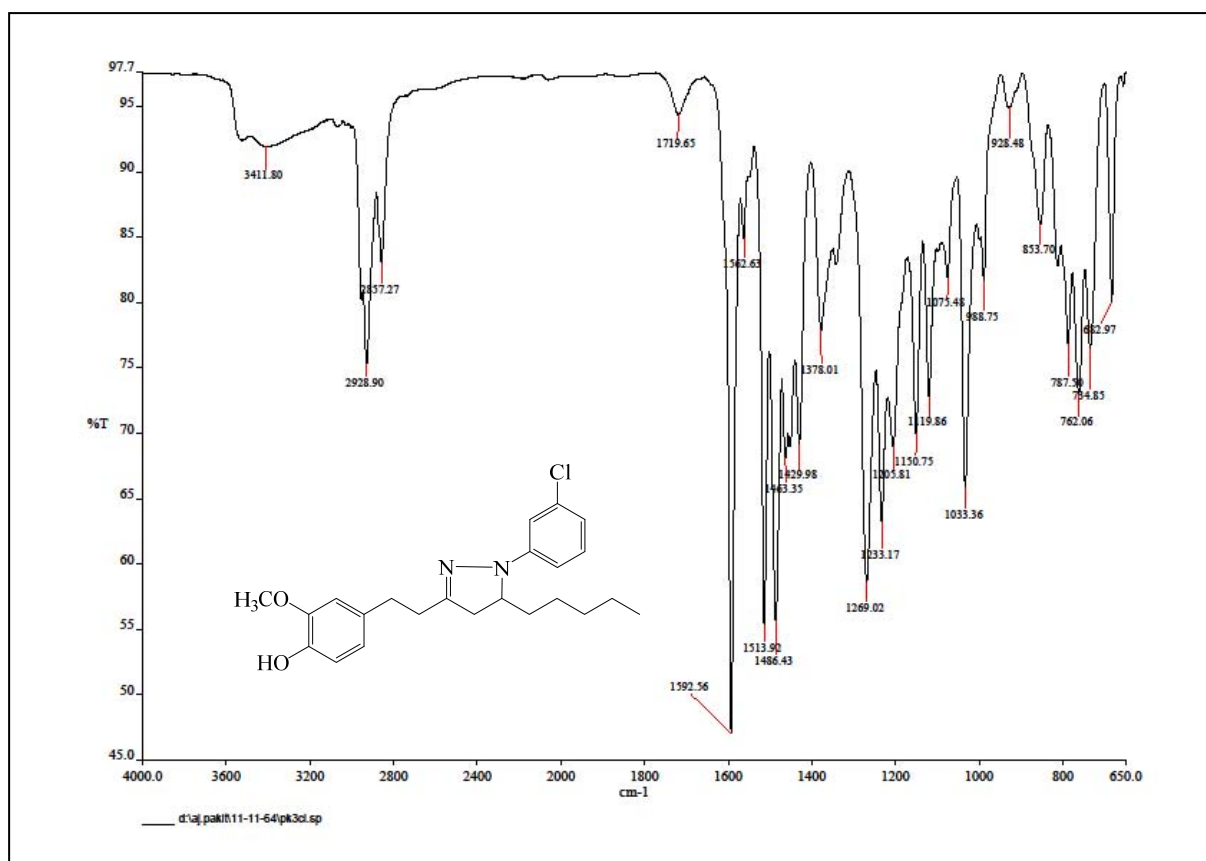

**Figure S51.** IR spectrum of **5g**.

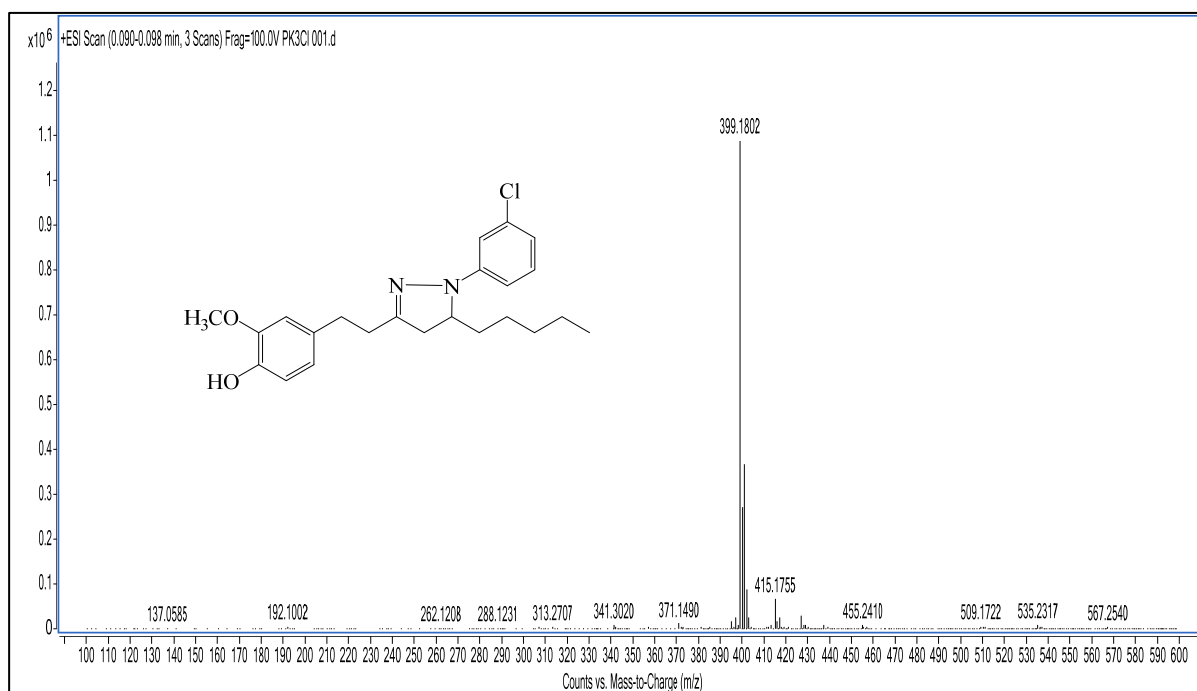

**Figure S52.** Mass spectrum of **5g**.

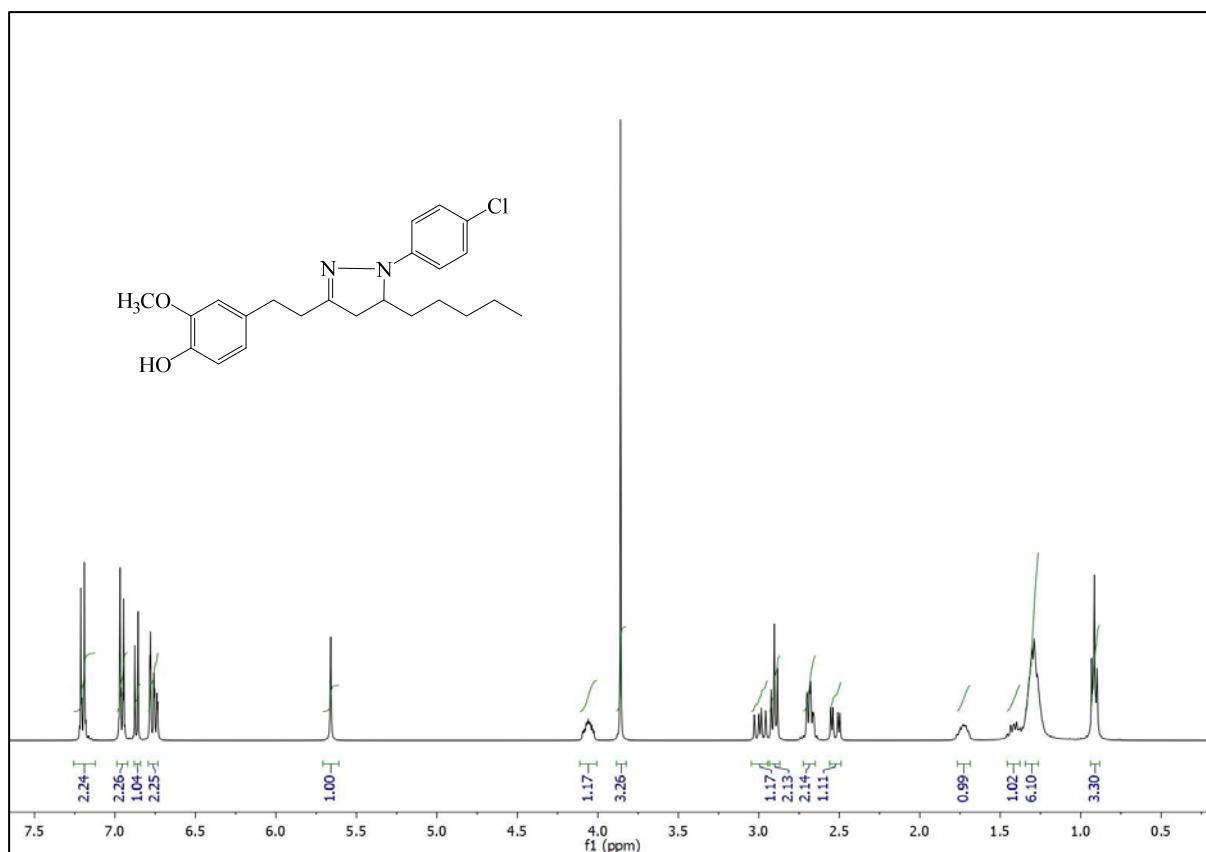

**Figure S53.** <sup>1</sup>H NMR spectrum of **5h**.

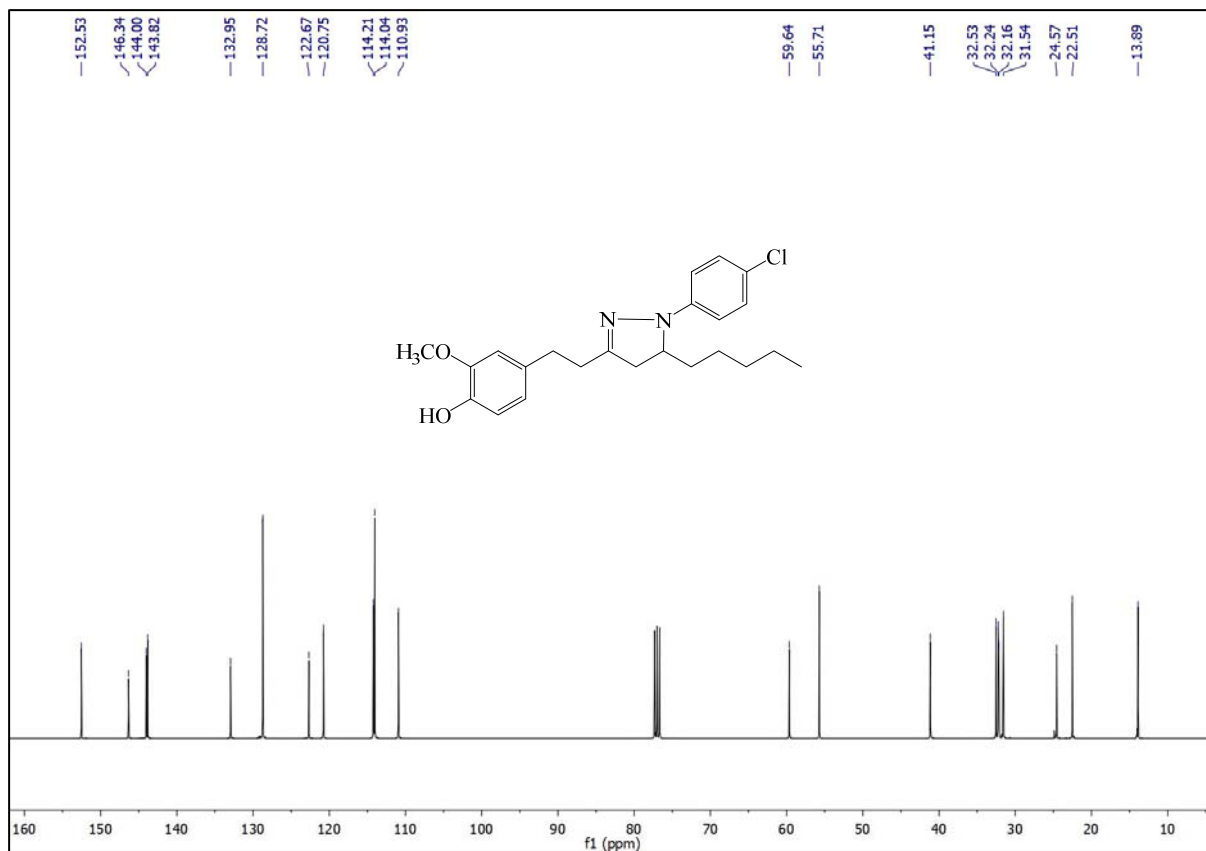

**Figure S54.** <sup>13</sup>C NMR spectrum of **5h**.

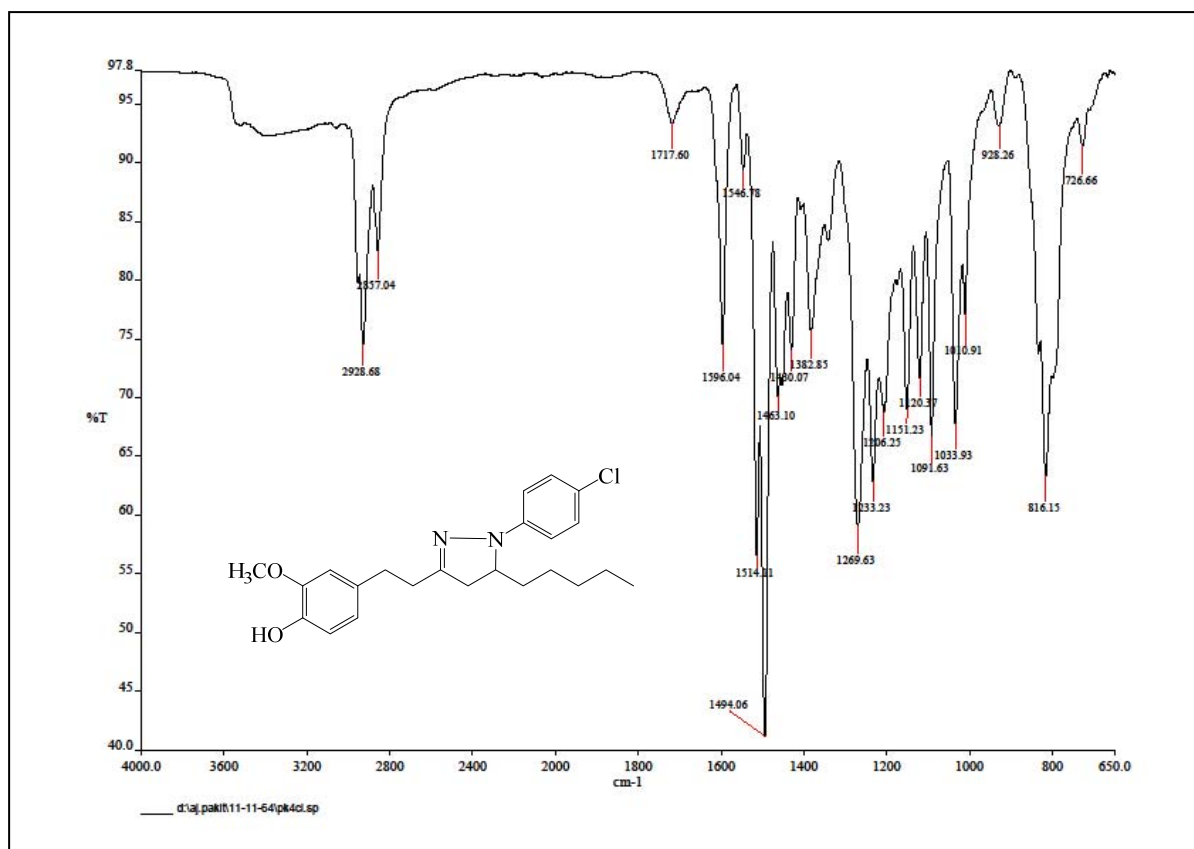

**Figure S55.** IR spectrum of **5h**.

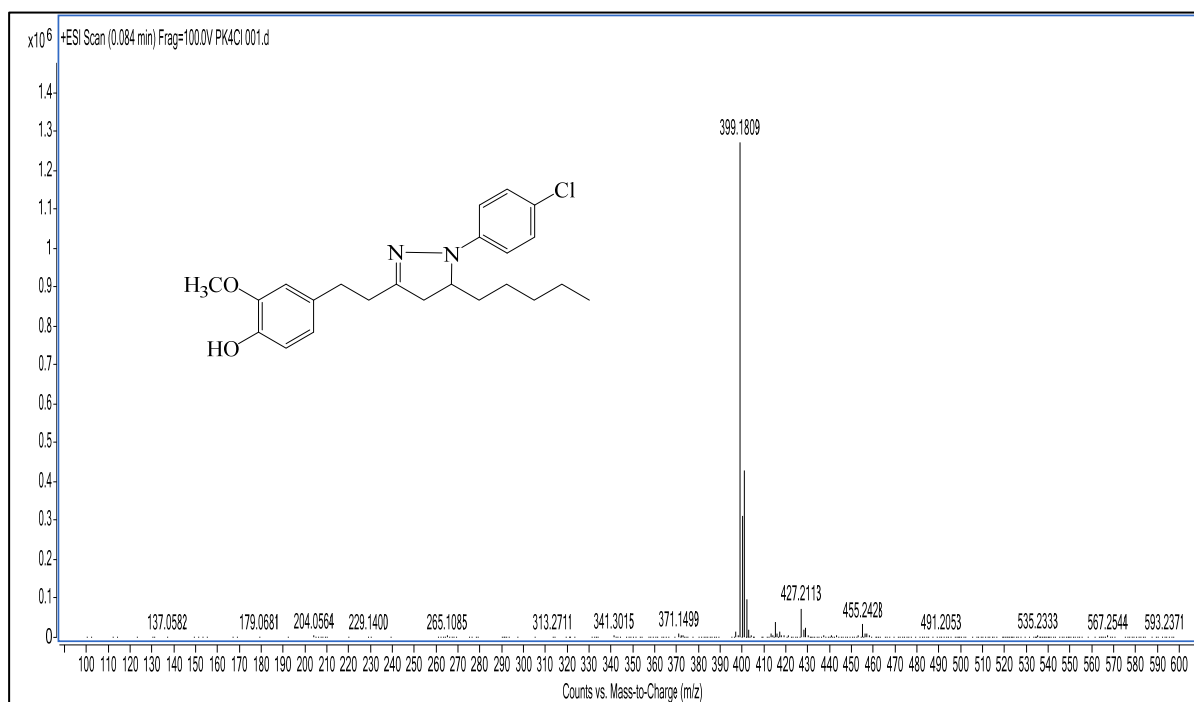

**Figure S56.** Mass spectrum of **5h**.

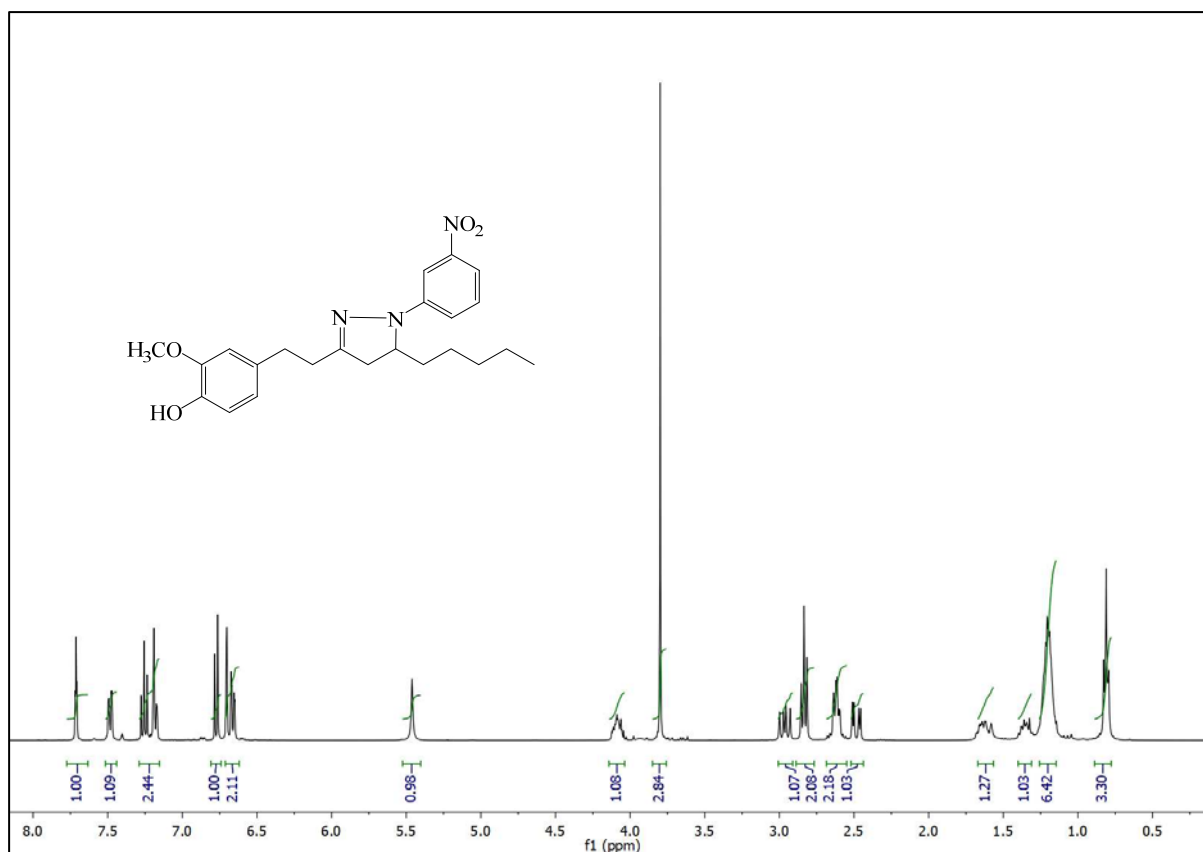

**Figure S57.** <sup>1</sup>H NMR spectrum of **5i**.

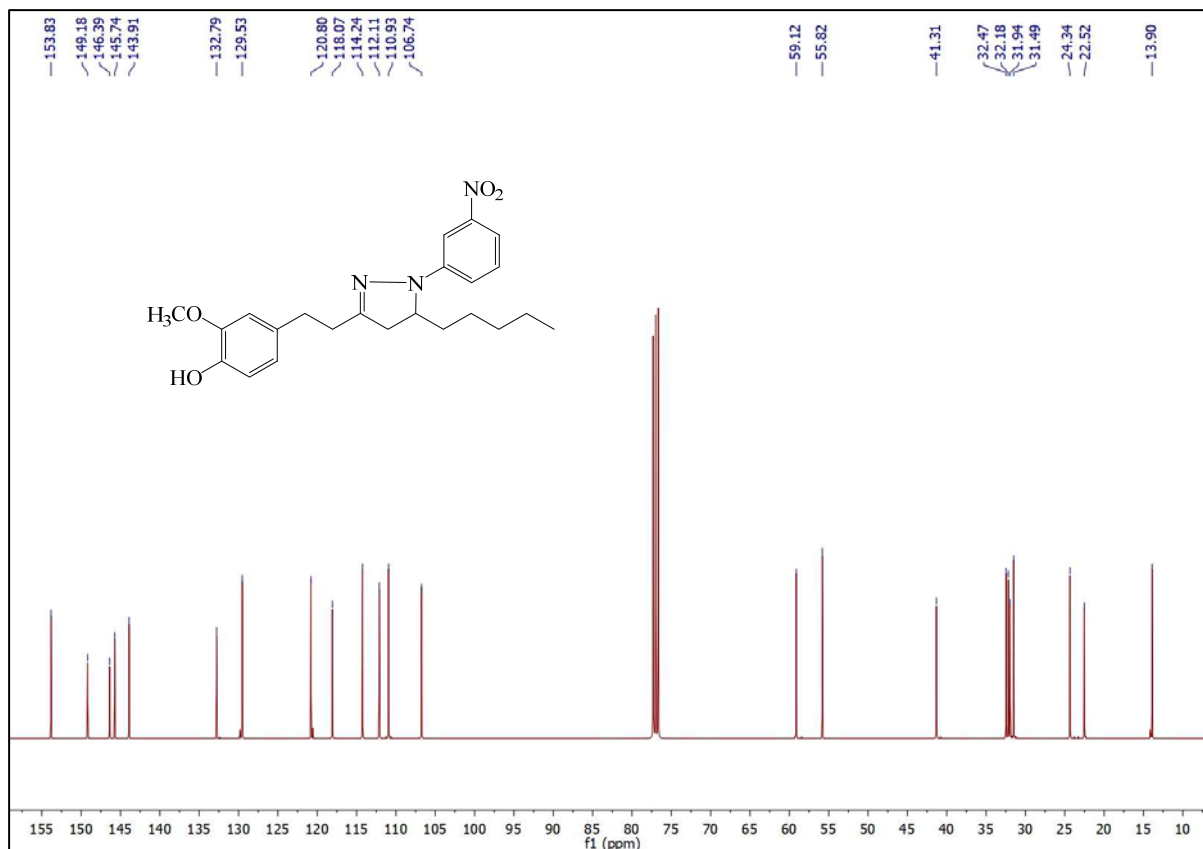

**Figure S58.** <sup>13</sup>C NMR spectrum of **5i**.

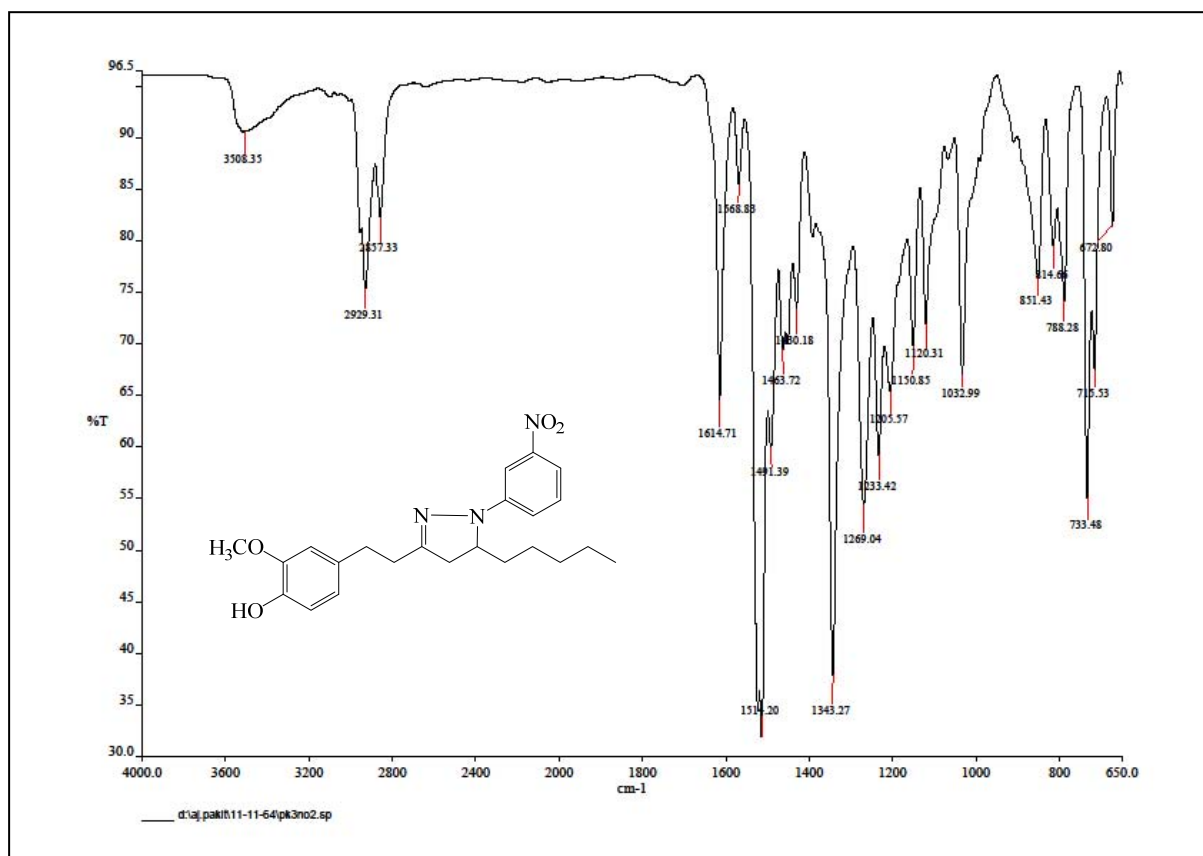

**Figure S59.** IR spectrum of **5i**.

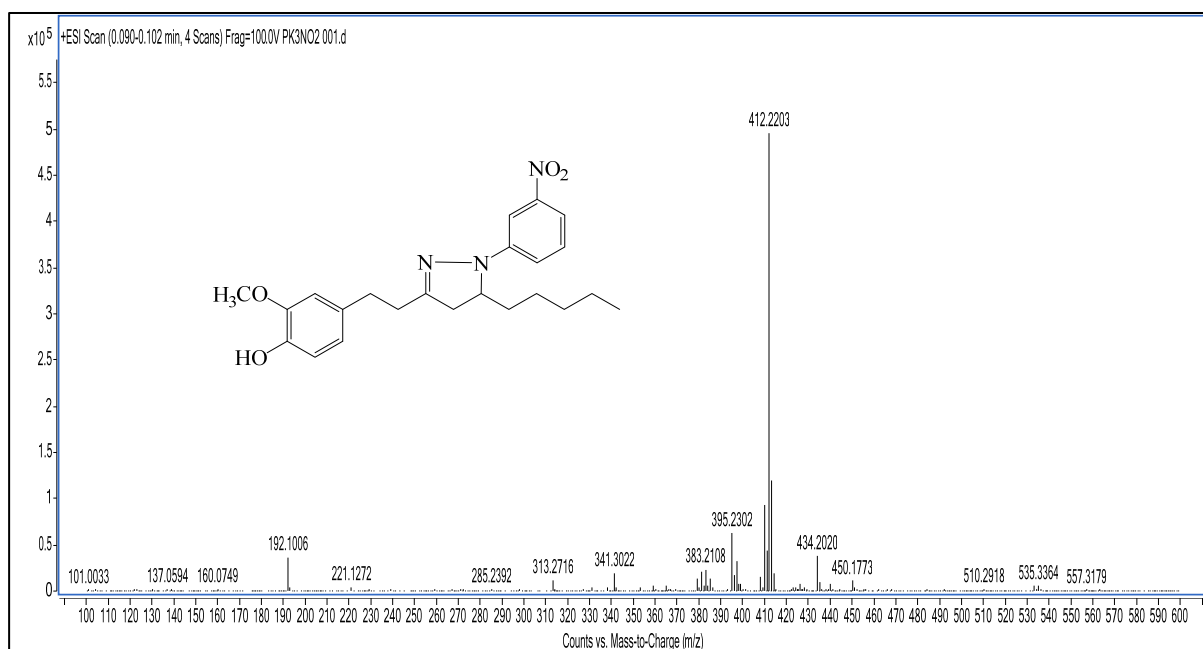

**Figure S60.** Mass spectrum of **5i**.

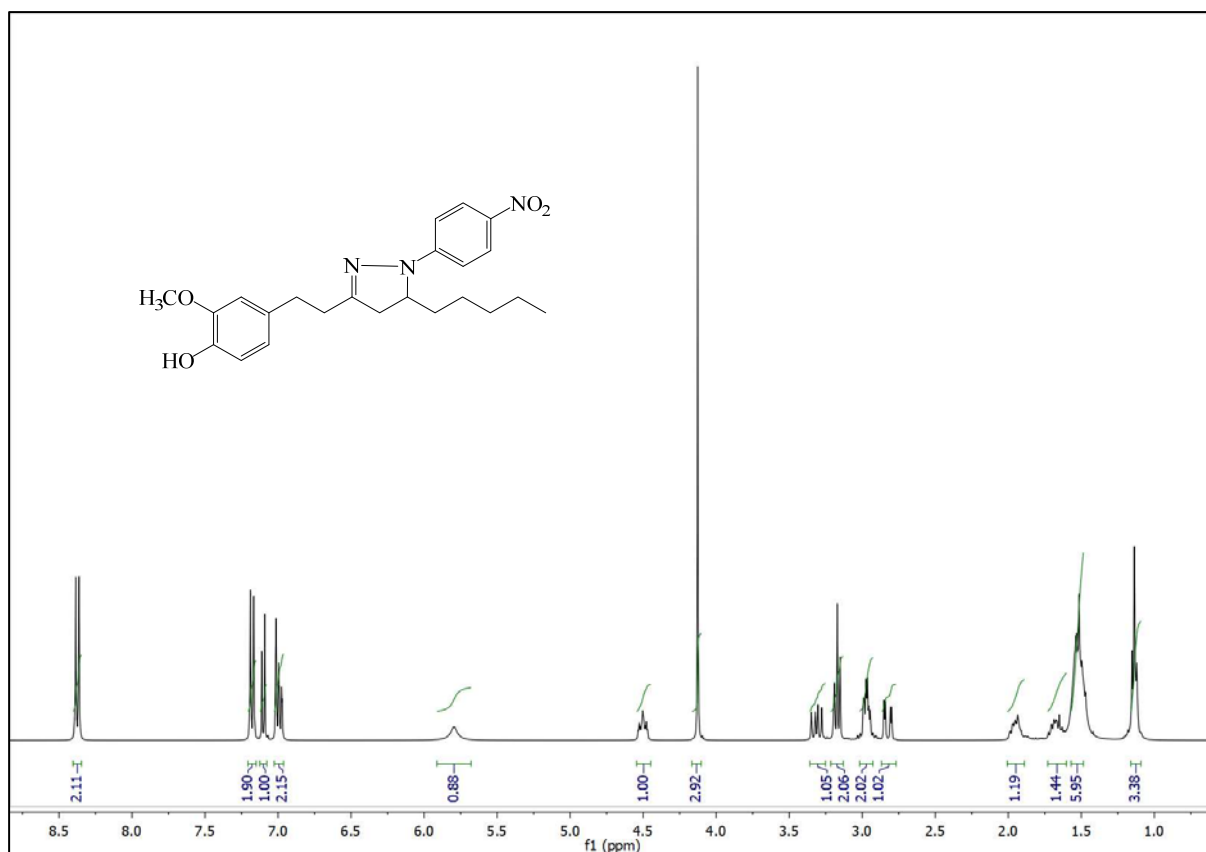

**Figure S61.** <sup>1</sup>H NMR spectrum of **5j**.

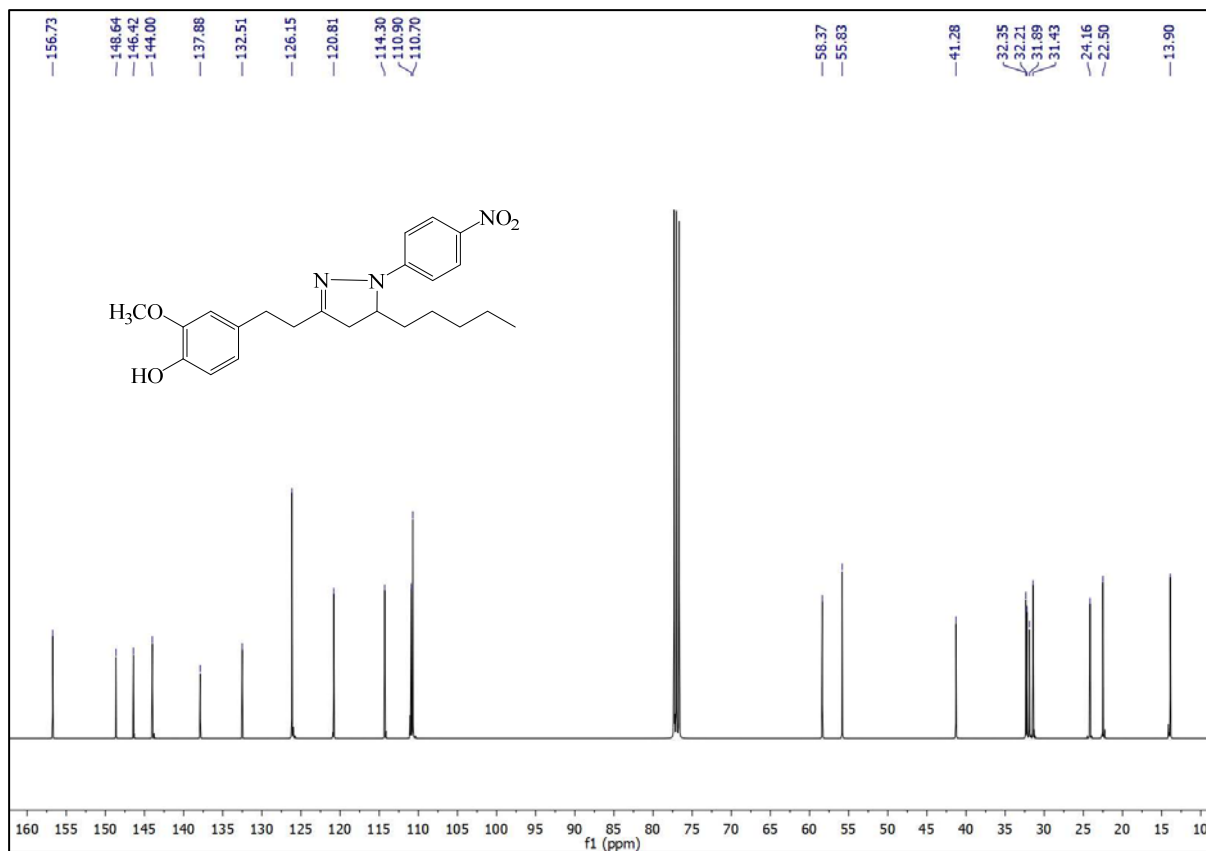

**Figure S62.** <sup>13</sup>C NMR spectrum of **5j**.

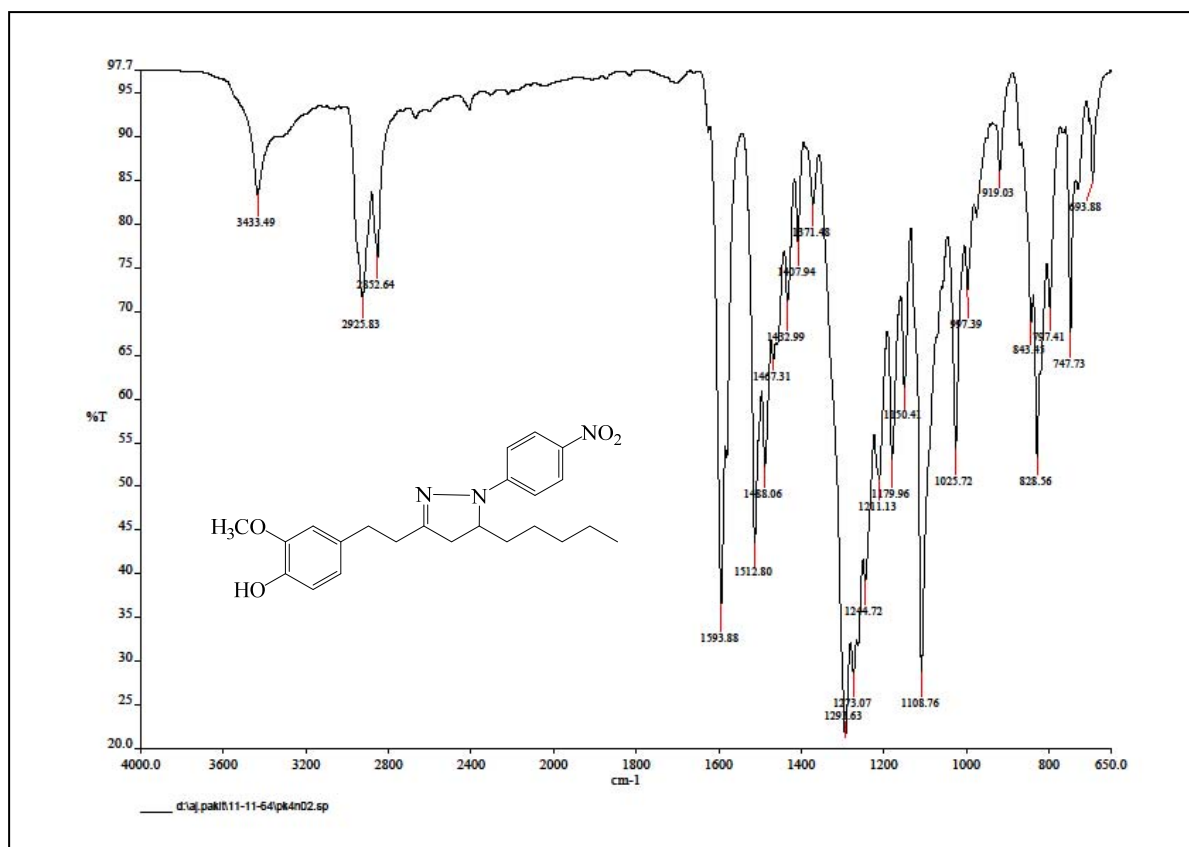

**Figure S63.** IR spectrum of **5j**.

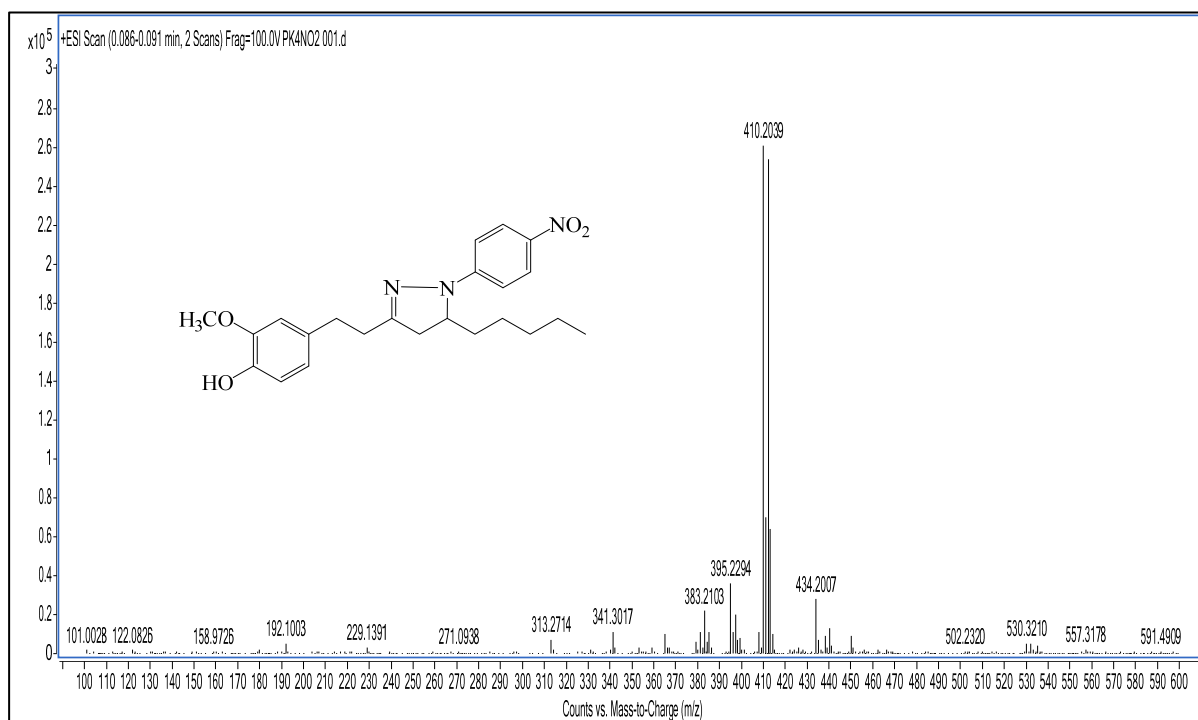

**Figure S64.** Mass spectrum of **5j**.

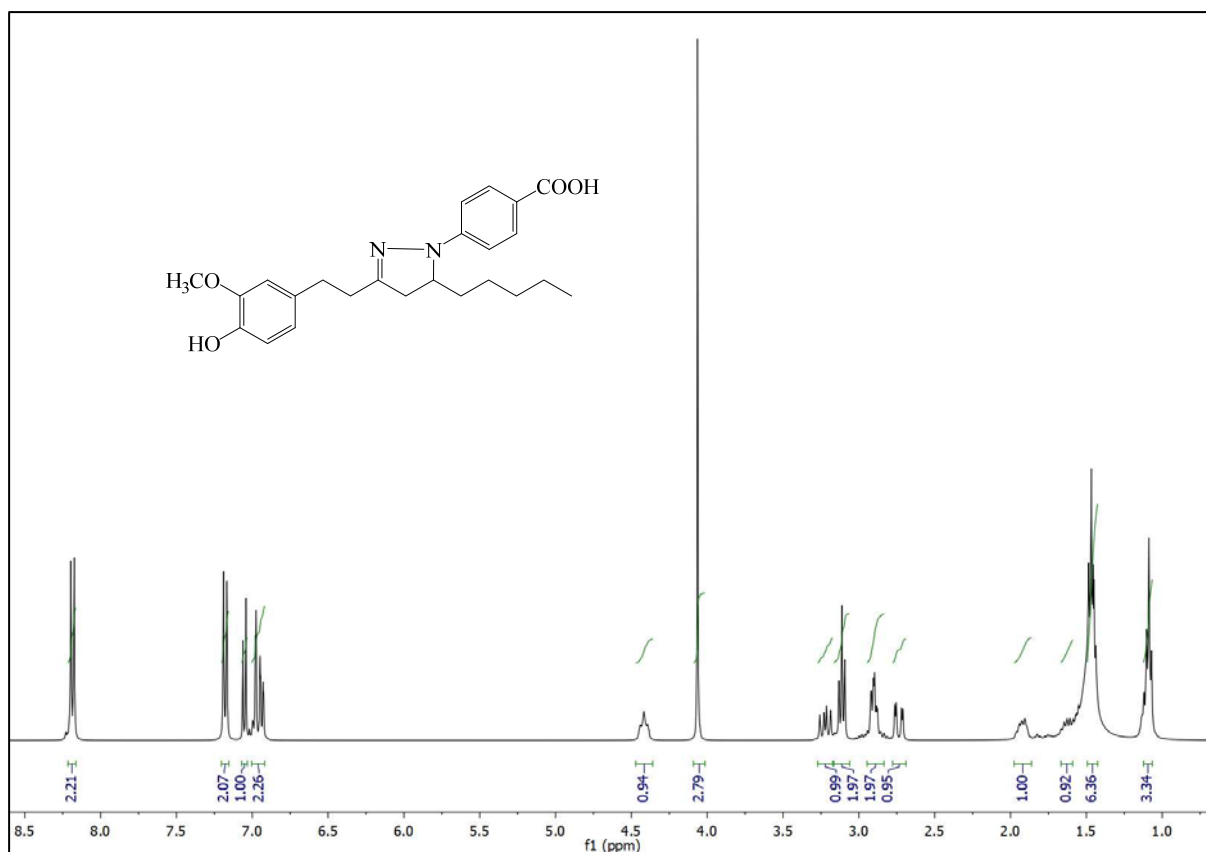

**Figure S65.** <sup>1</sup>H NMR spectrum of **5k**.

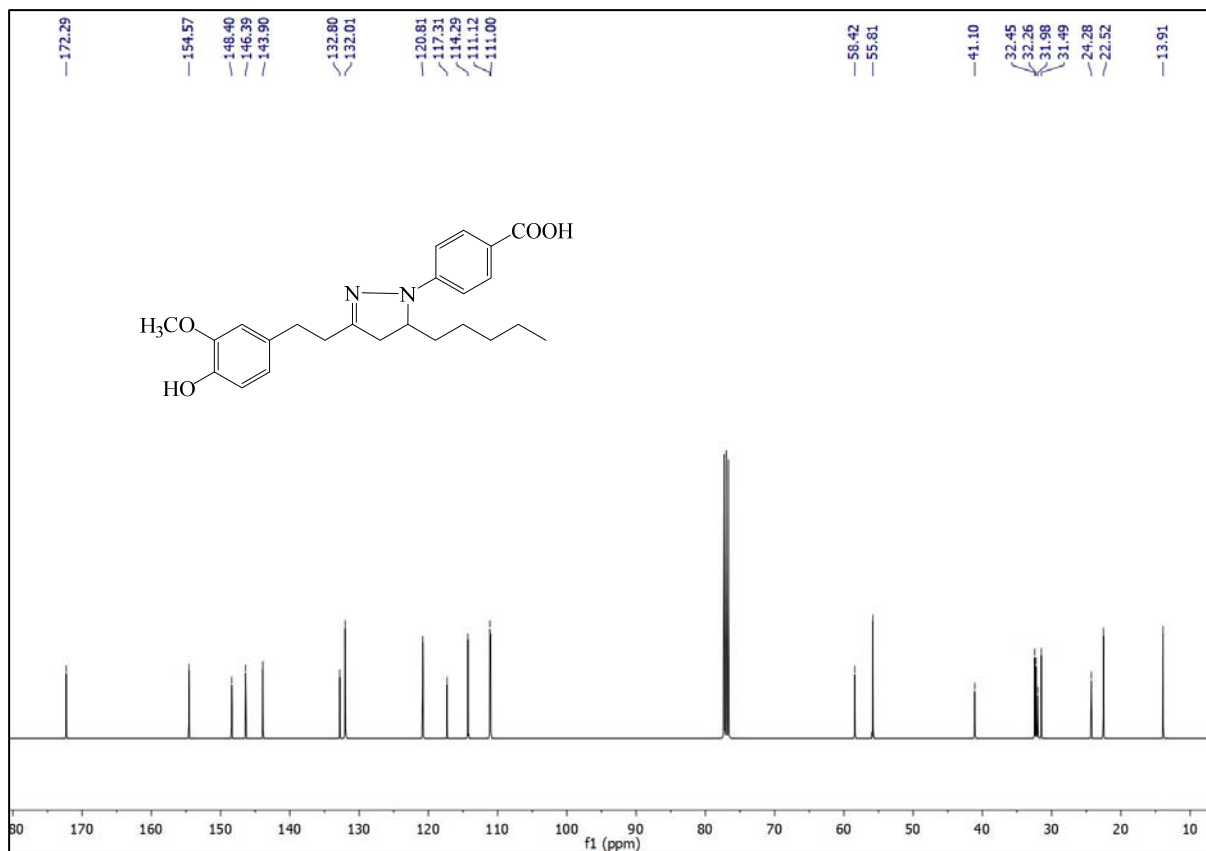

**Figure S66.** <sup>13</sup>C NMR spectrum of **5k**.

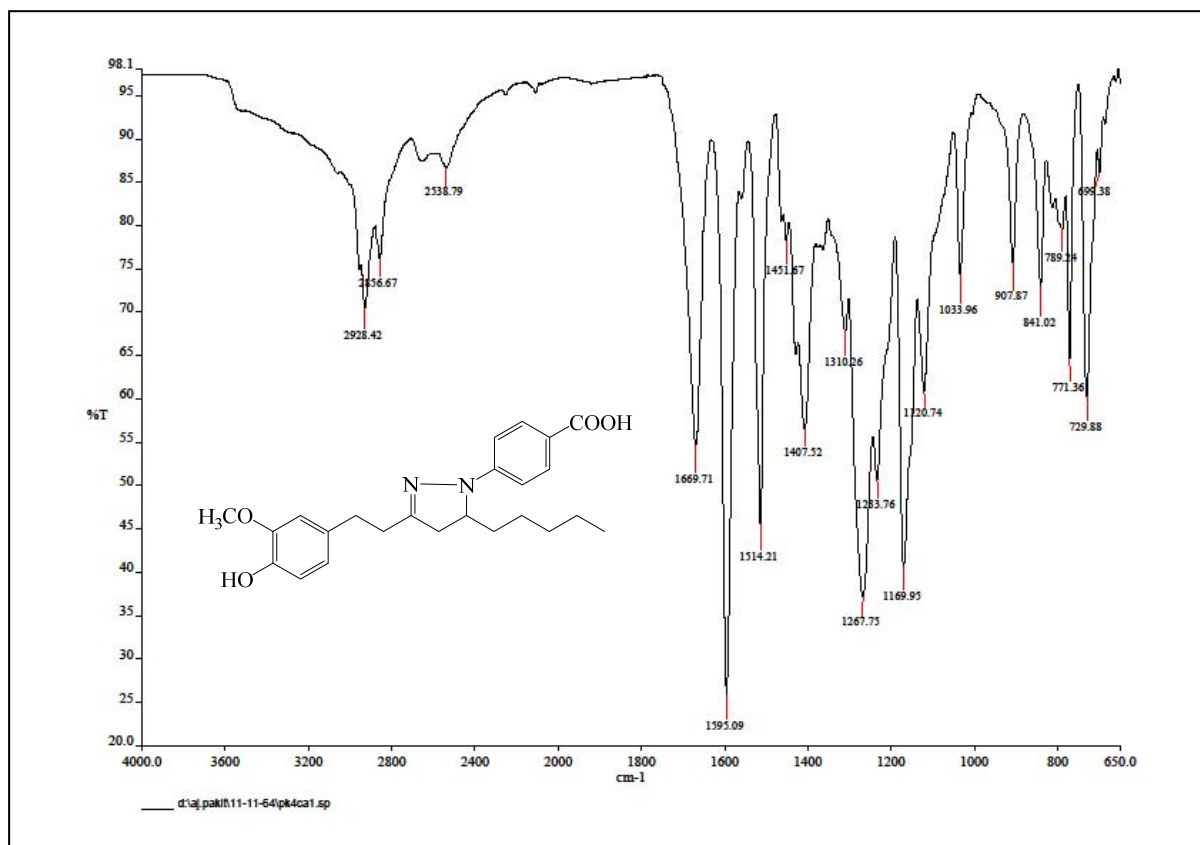

Figure S67. IR spectrum of 5k.

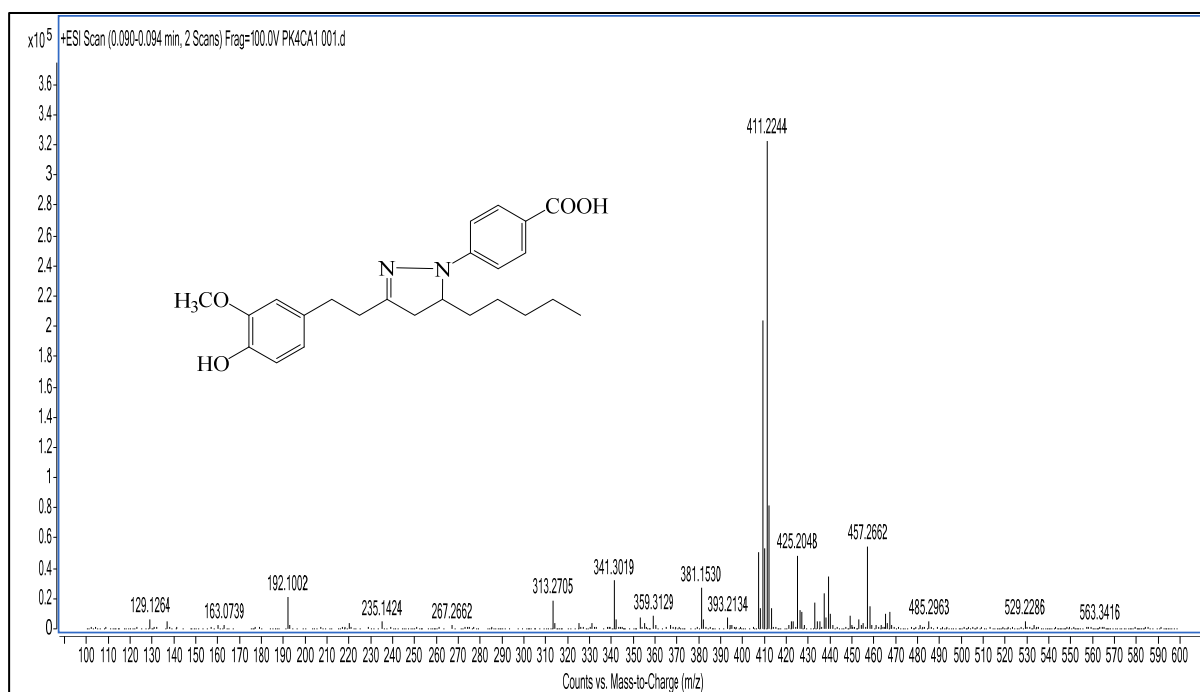

Figure S68. Mass spectrum of 5k.

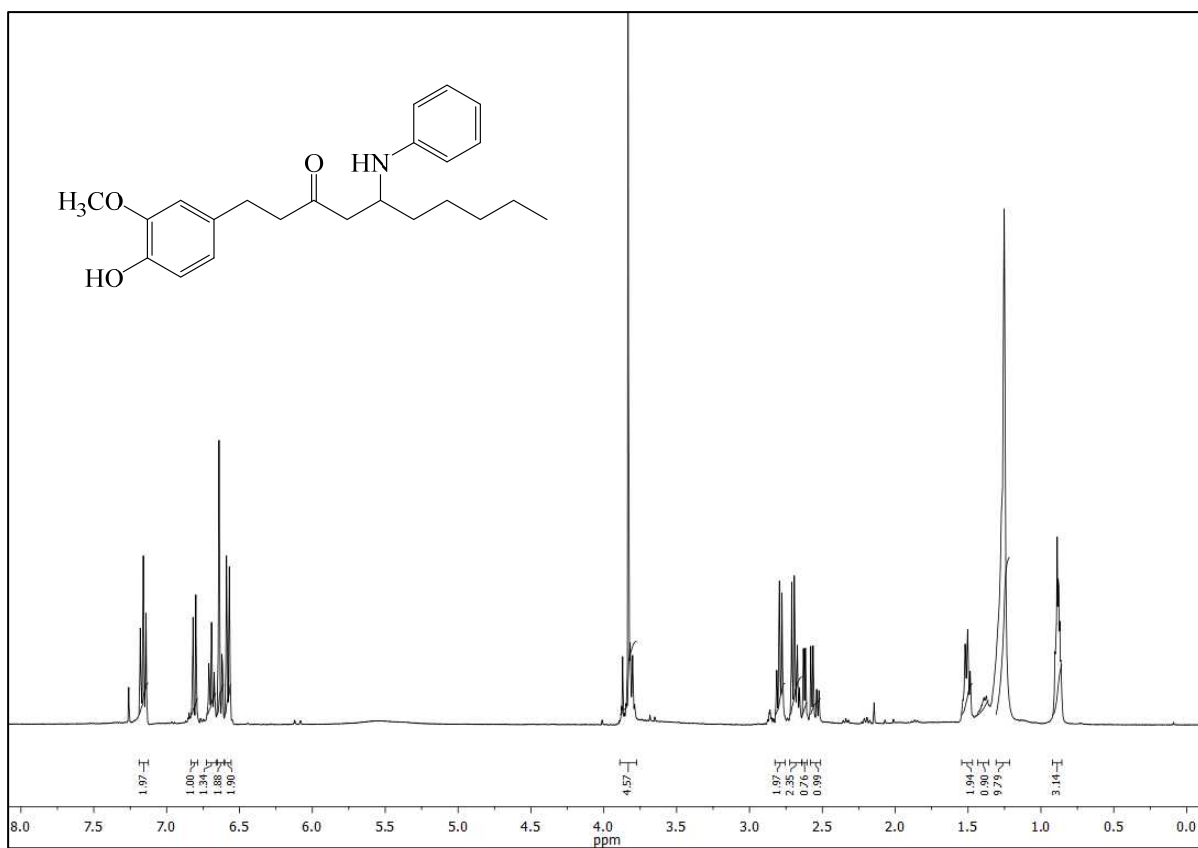

Figure S69. <sup>1</sup>H NMR spectrum of 6a.

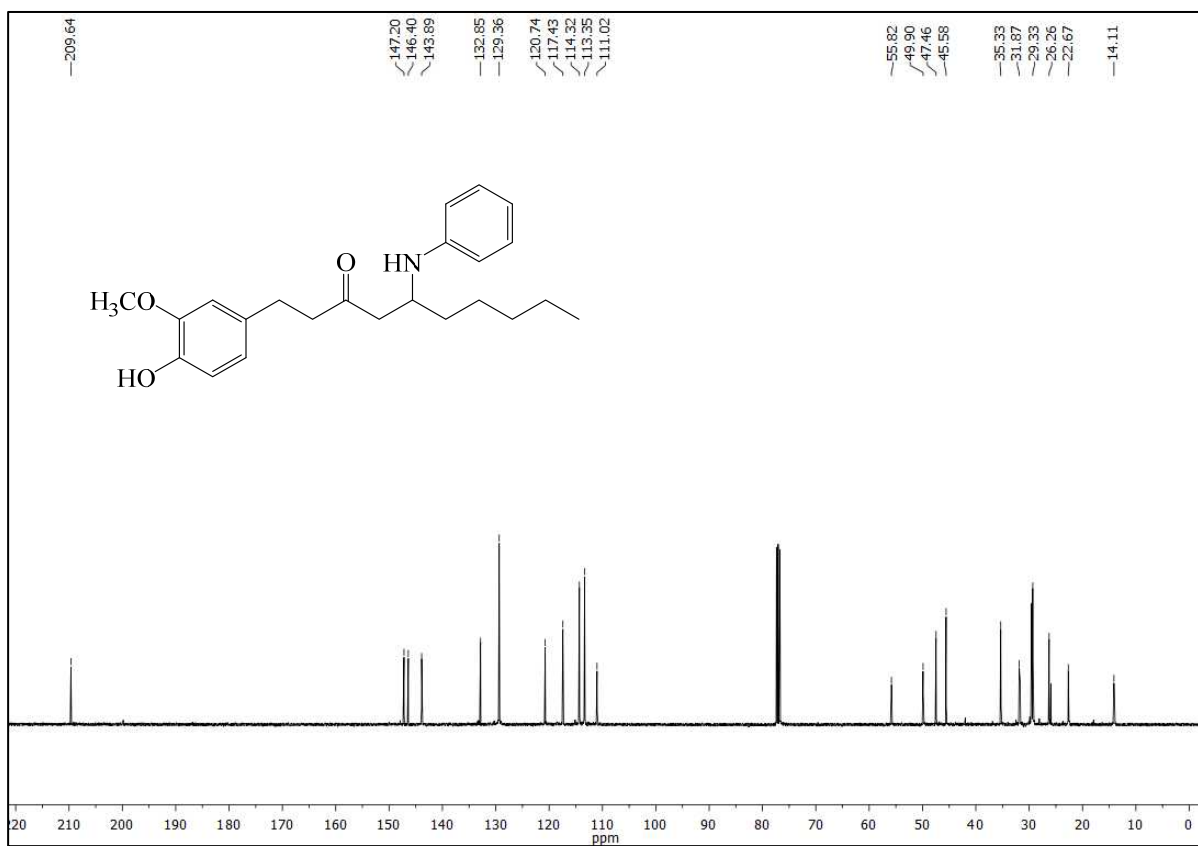

Figure S70. <sup>13</sup>C NMR spectrum of 6a.

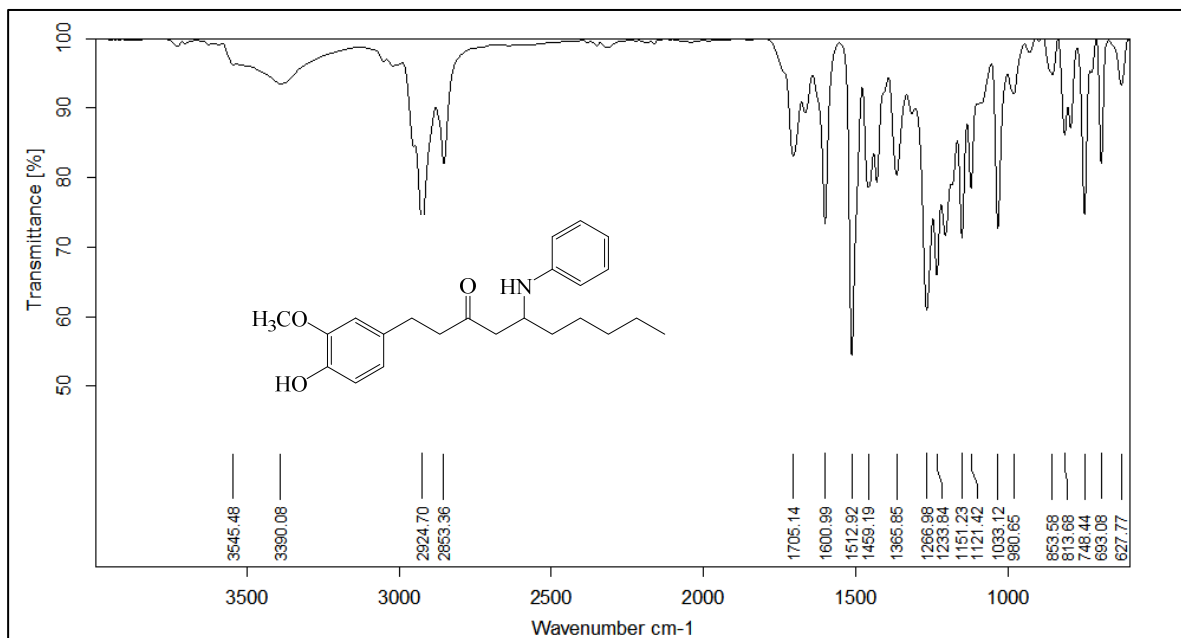

**Figure S71.** IR spectrum of 6a.

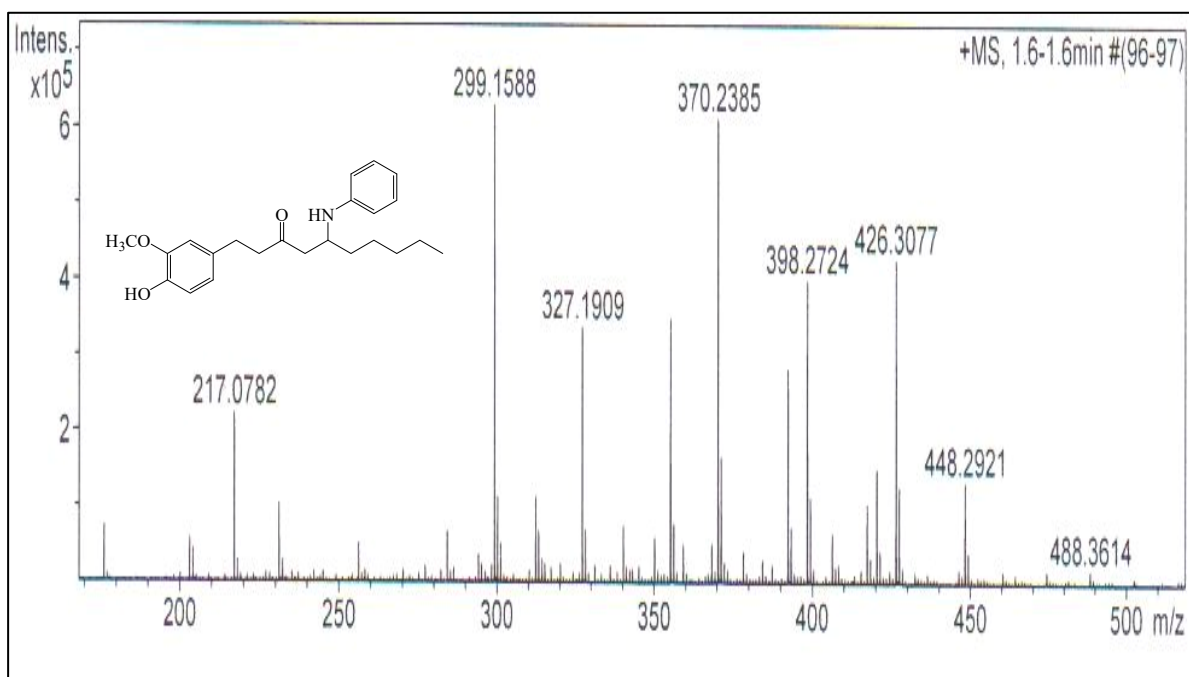

**Figure S72.** Mass spectrum of 6a.

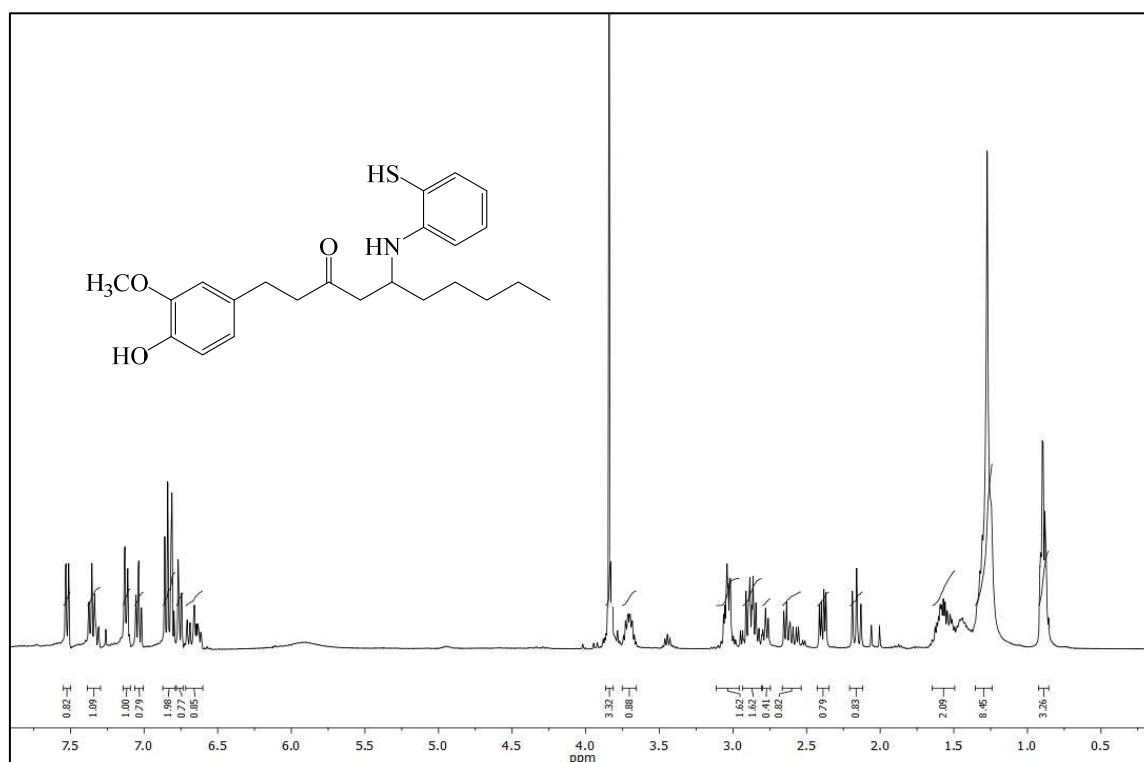

**Figure S73.** <sup>1</sup>H NMR spectrum of **6b**.

#

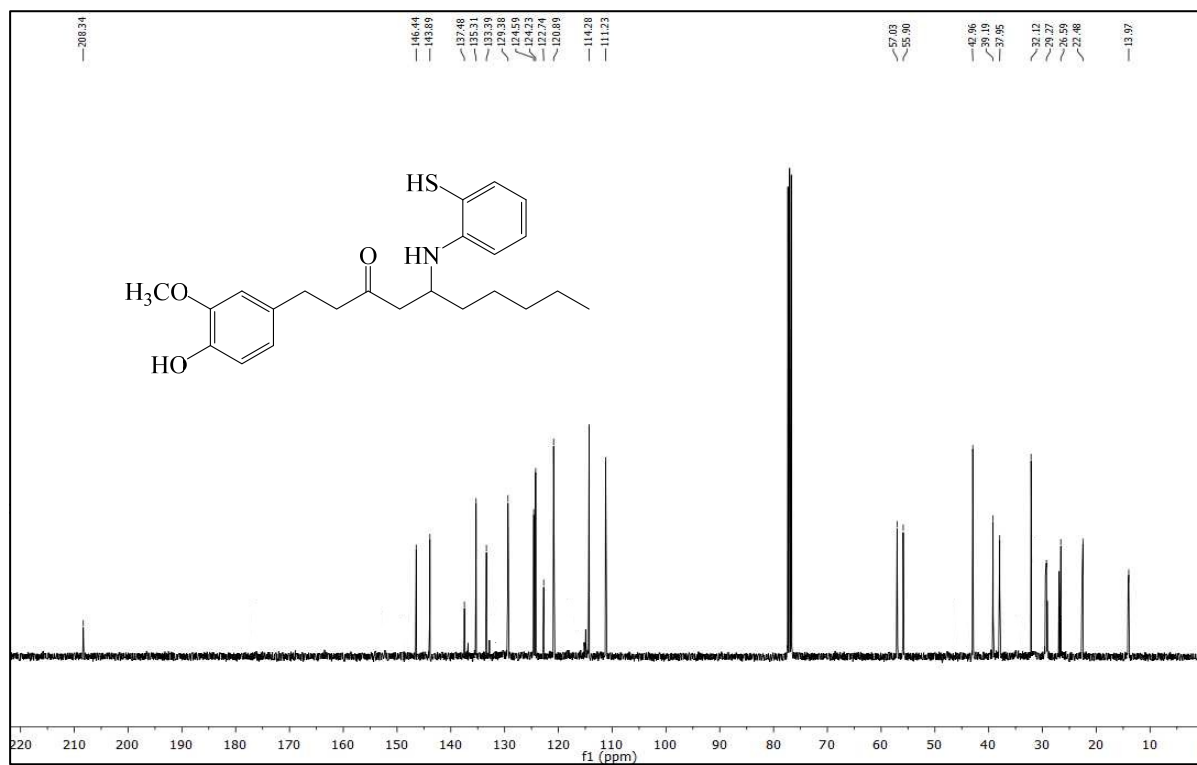

**Figure S74.** <sup>13</sup>C NMR spectrum of **6b**.

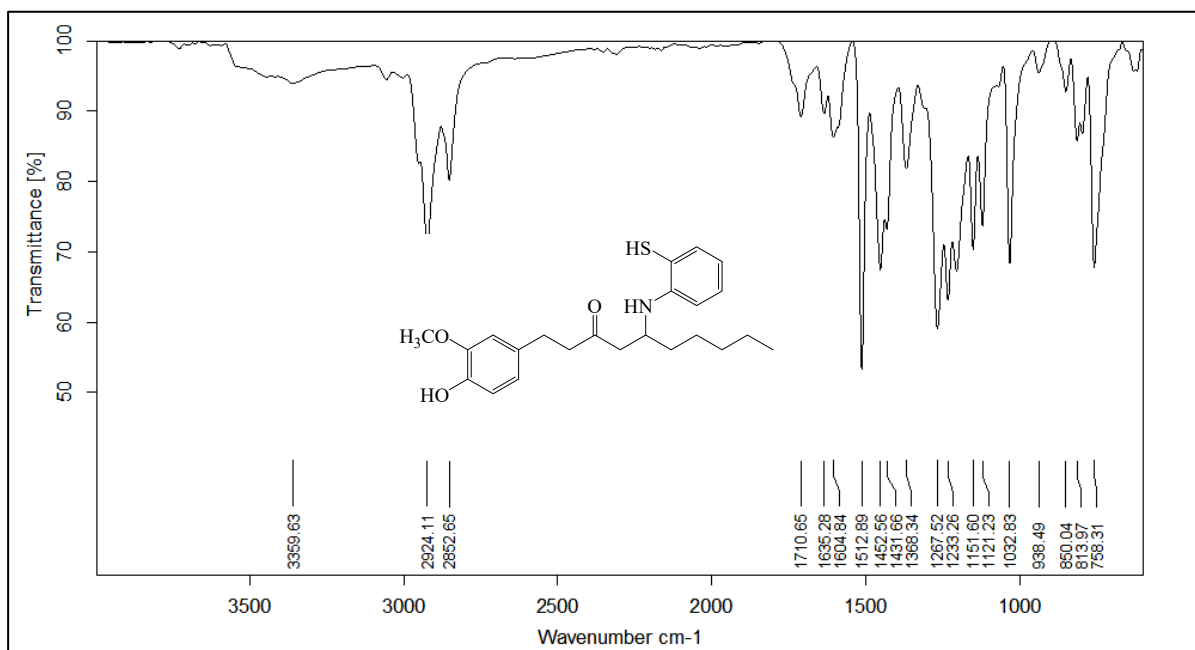

**Figure S75.** IR spectrum of **6b**.

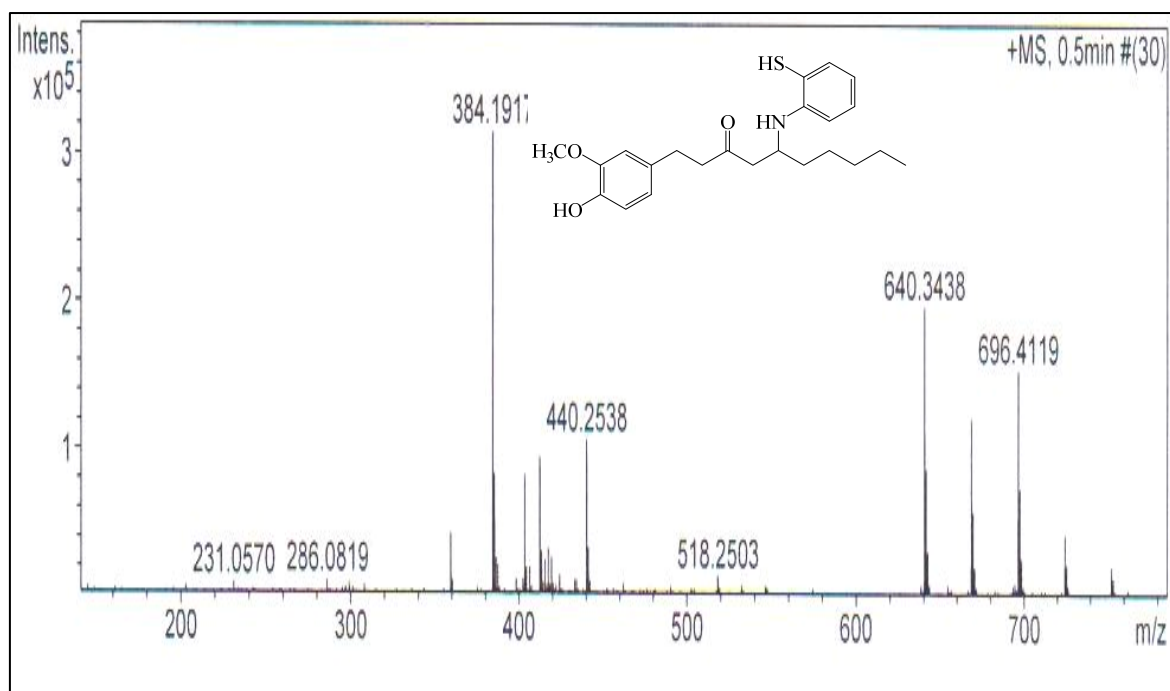

**Figure S76.** Mass spectrum of **6b**.

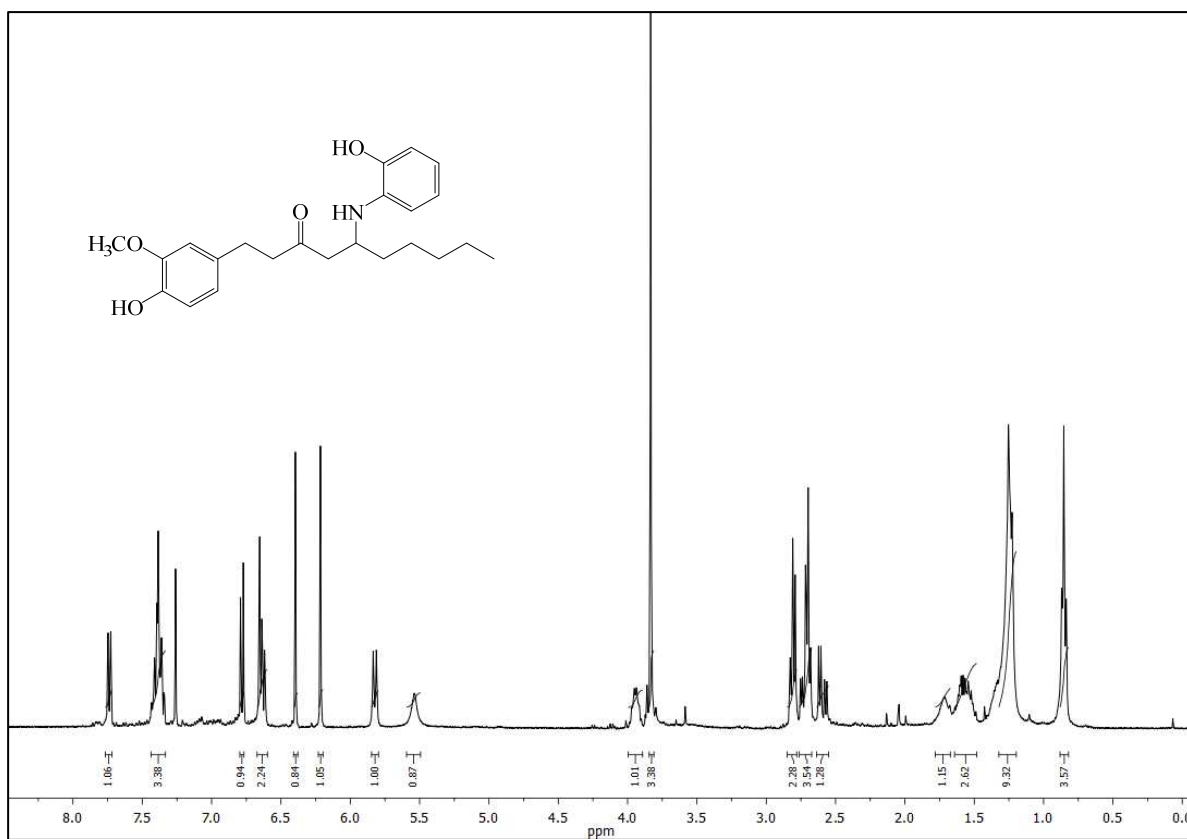

Figure S77. <sup>1</sup>H NMR spectrum of 6c.

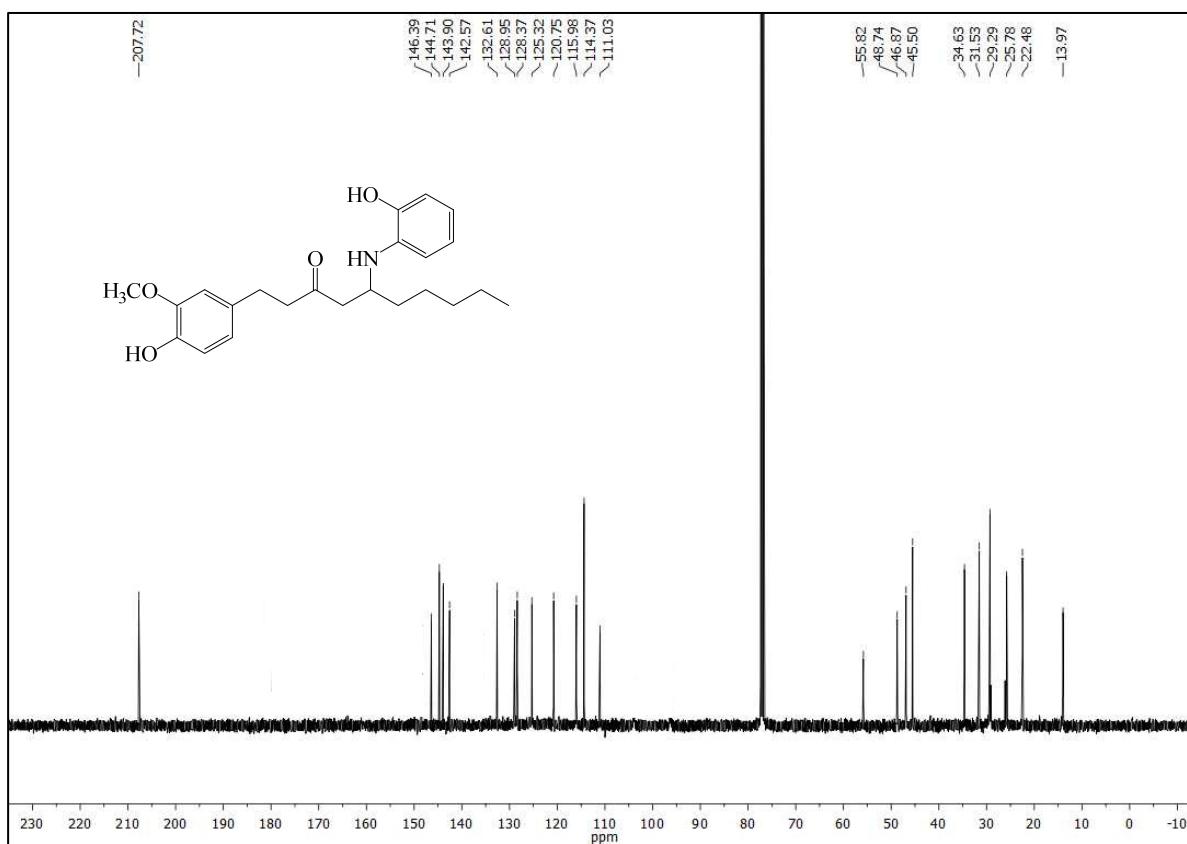

Figure S78. <sup>13</sup>C NMR spectrum of 6c.

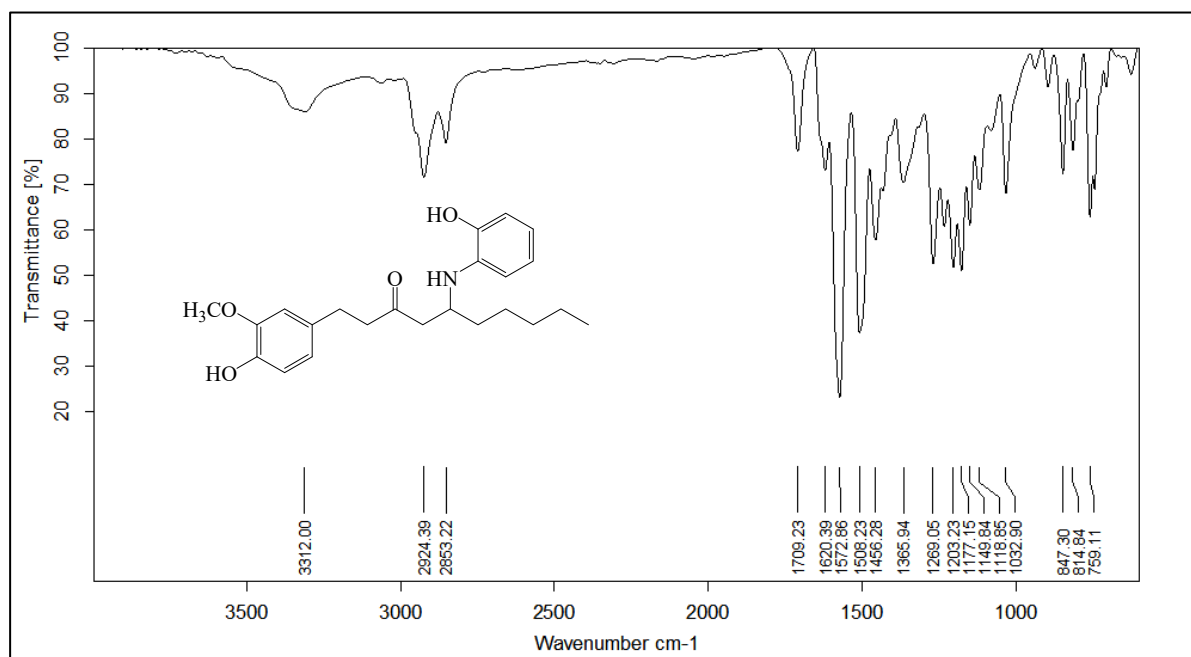

**Figure S79.** IR spectrum of **6c**.

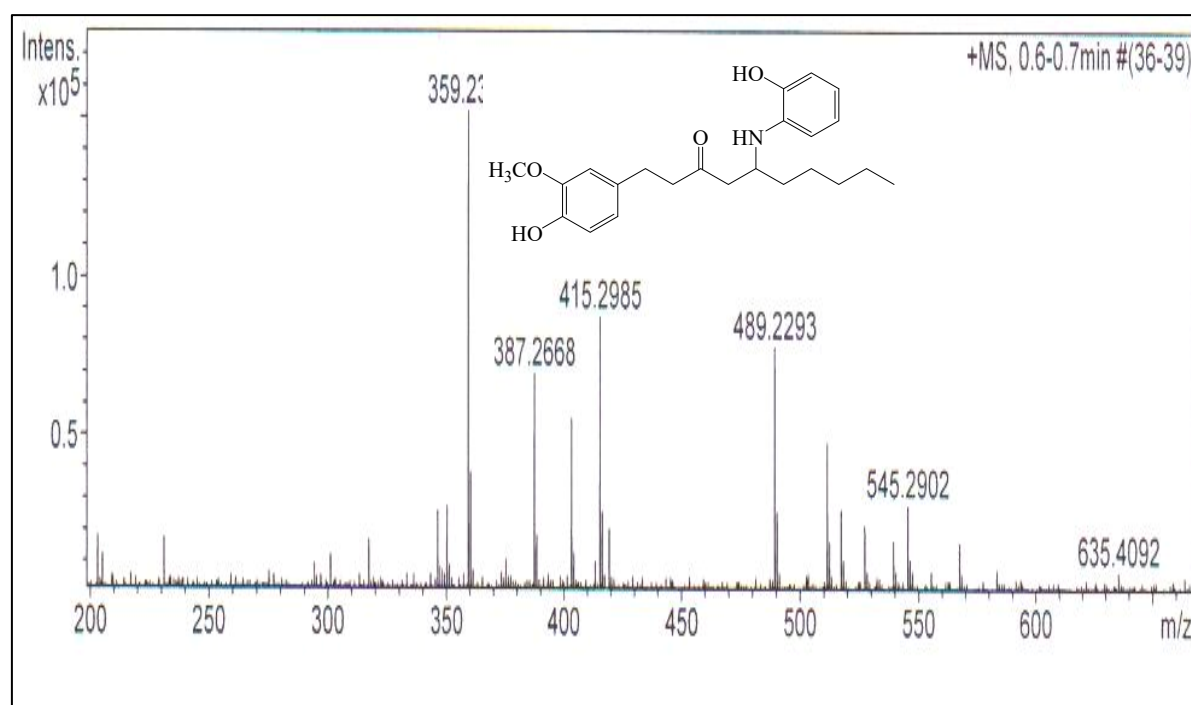

**Figure S80.** Mass spectrum of **6c**.

#

#

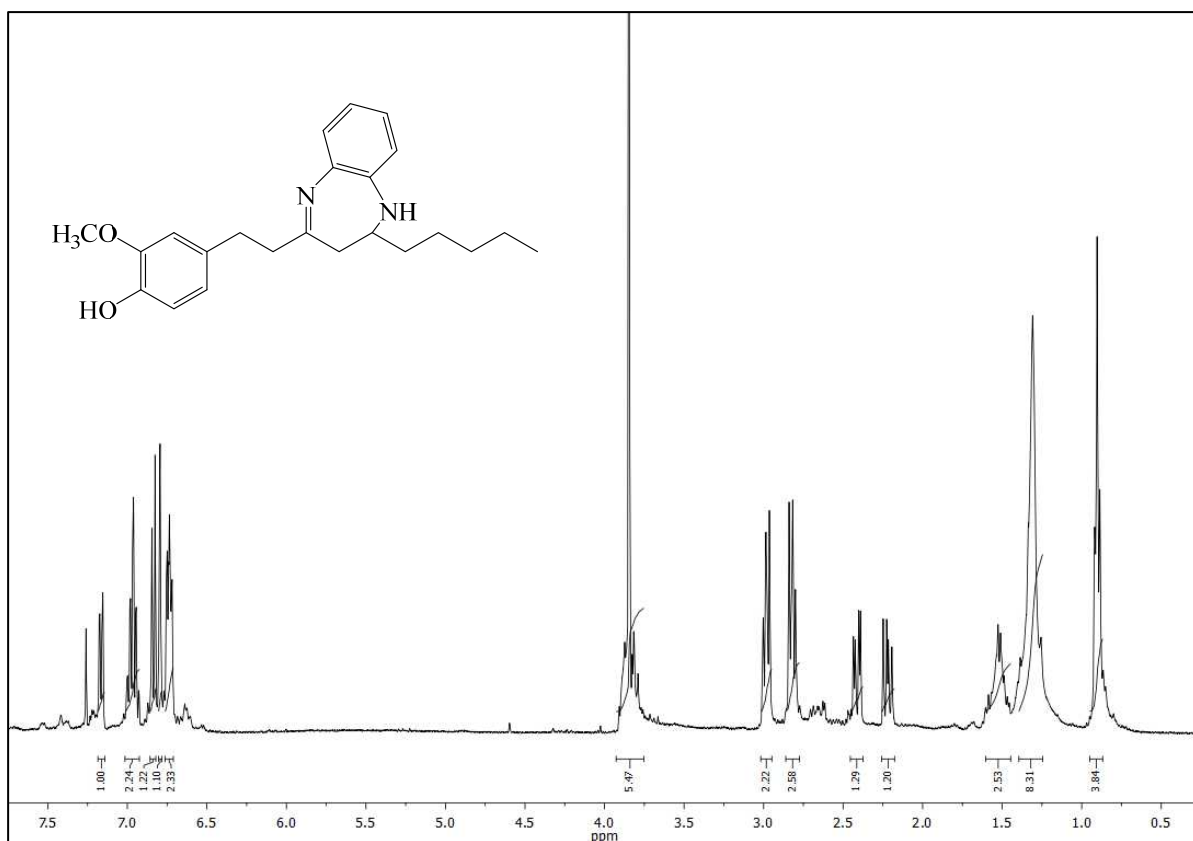

Figure S81. <sup>1</sup>H NMR spectrum of 7.

#

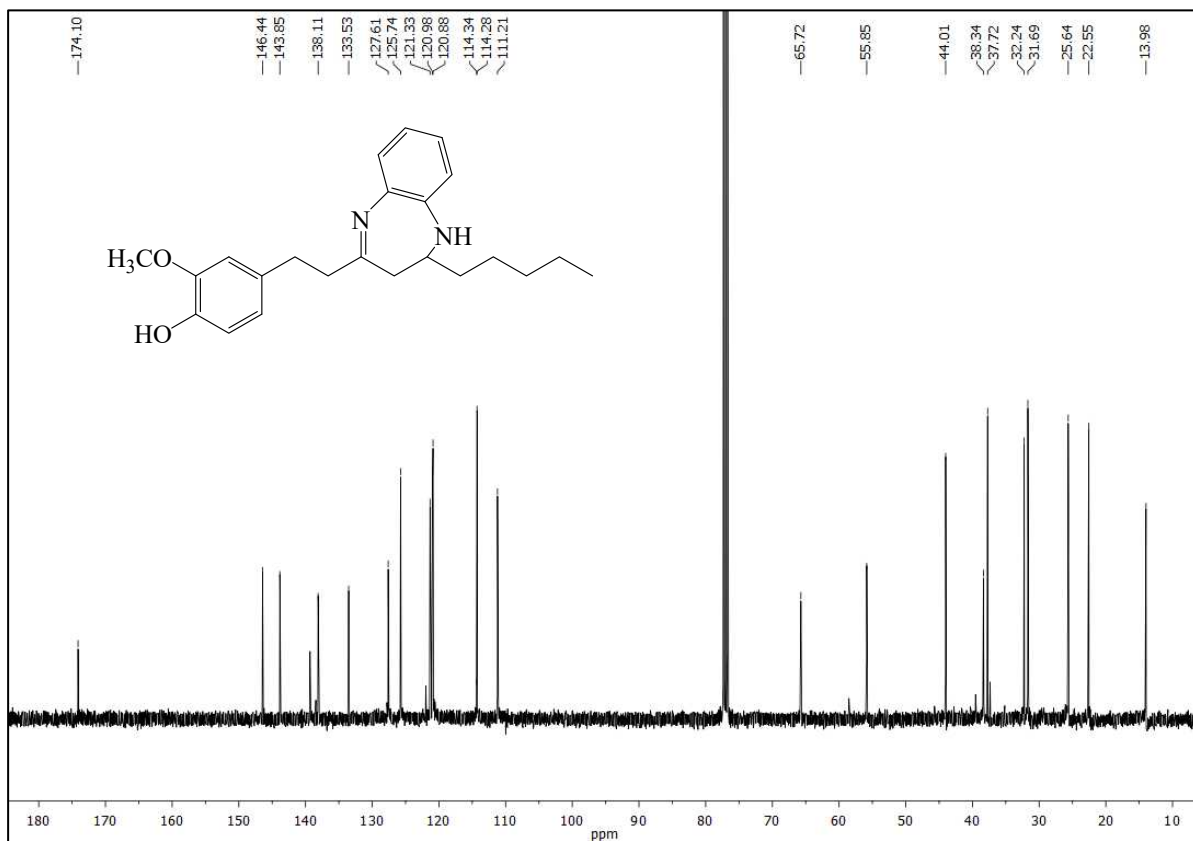

Figure S82. <sup>13</sup>C NMR spectrum of 7.

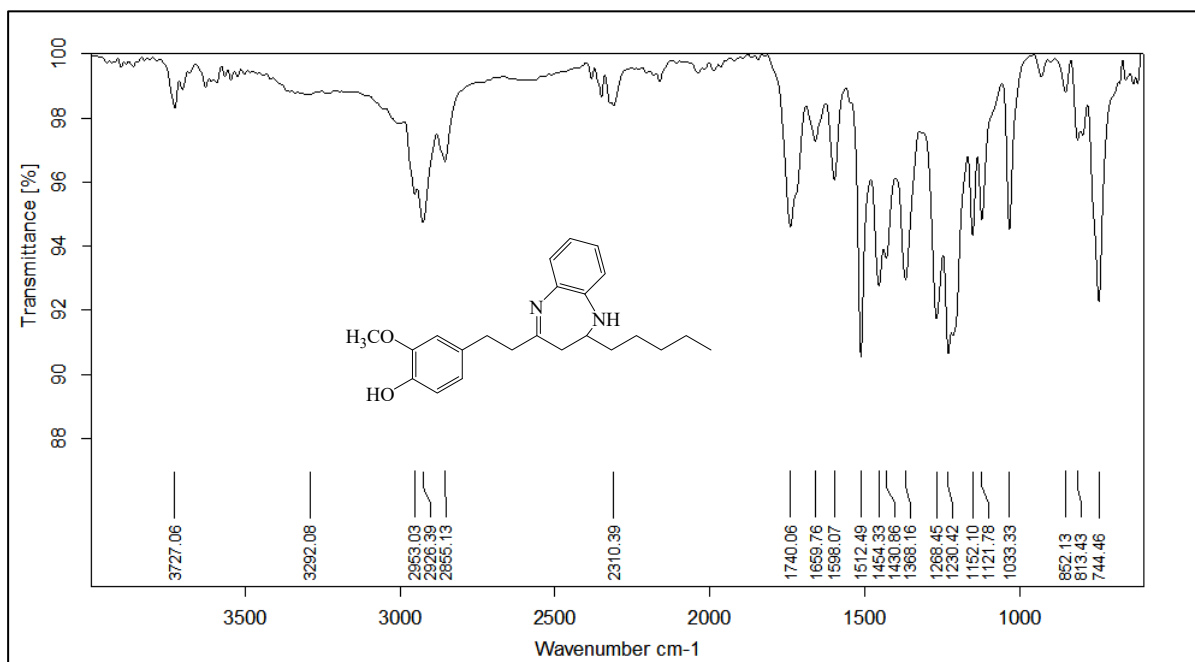

**Figure S83.** IR spectrum of 7.

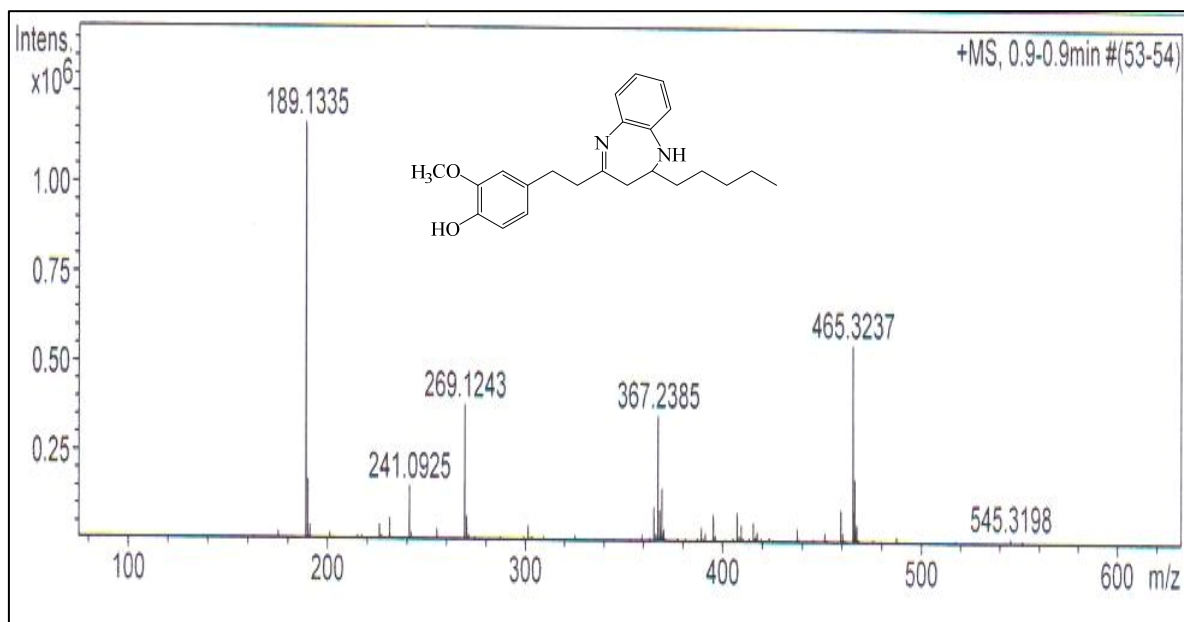

**Figure S84.** Mass spectrum of 7.
